# Supplementary material for: Effect of substitution position of aryl groups on the thermal back reactivity of aza-diarylethene photoswitches and prediction by density functional theory
Source: publisher site journal article supplement (doi:10.3762/bjoc.21.16), 2025-01-31
Supplement: Additional file 1 [file 1860-5397-21-16-S1.pdf]

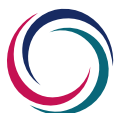

## Supporting Information

for

### **Effect of substitution position of aryl groups on the thermal back reactivity of aza-diarylethene photoswitches and prediction by density functional theory**

Misato Suganuma, Daichi Kitagawa, Shota Hamatani and Seiya Kobatake

*Beilstein J. Org. Chem.* **2025**, *21*, 242–252. [doi:10.3762/bjoc.21.16](https://doi.org/10.3762/bjoc.21.16)

### **Experimental details and analyses of thermal back reactions**

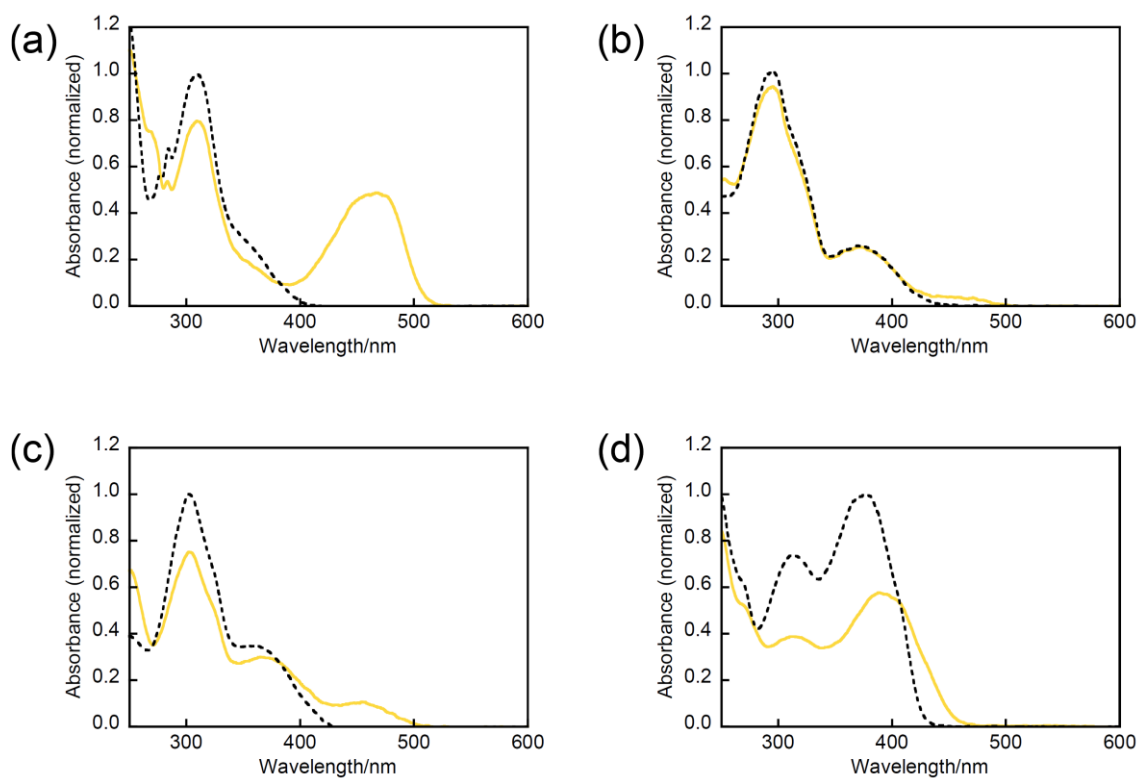

**Figure S1.** Absorption spectral changes of (a) **N4**, (b) **I1**, (c) **I2**, and (d) **I4** in *n*-hexane at 253 K for **N4**, 188 K for **I1**, 248 K for **I2**, and 233 K for **I4**: open-ring isomer (black line) and under irradiation with 365 nm light (yellow line).

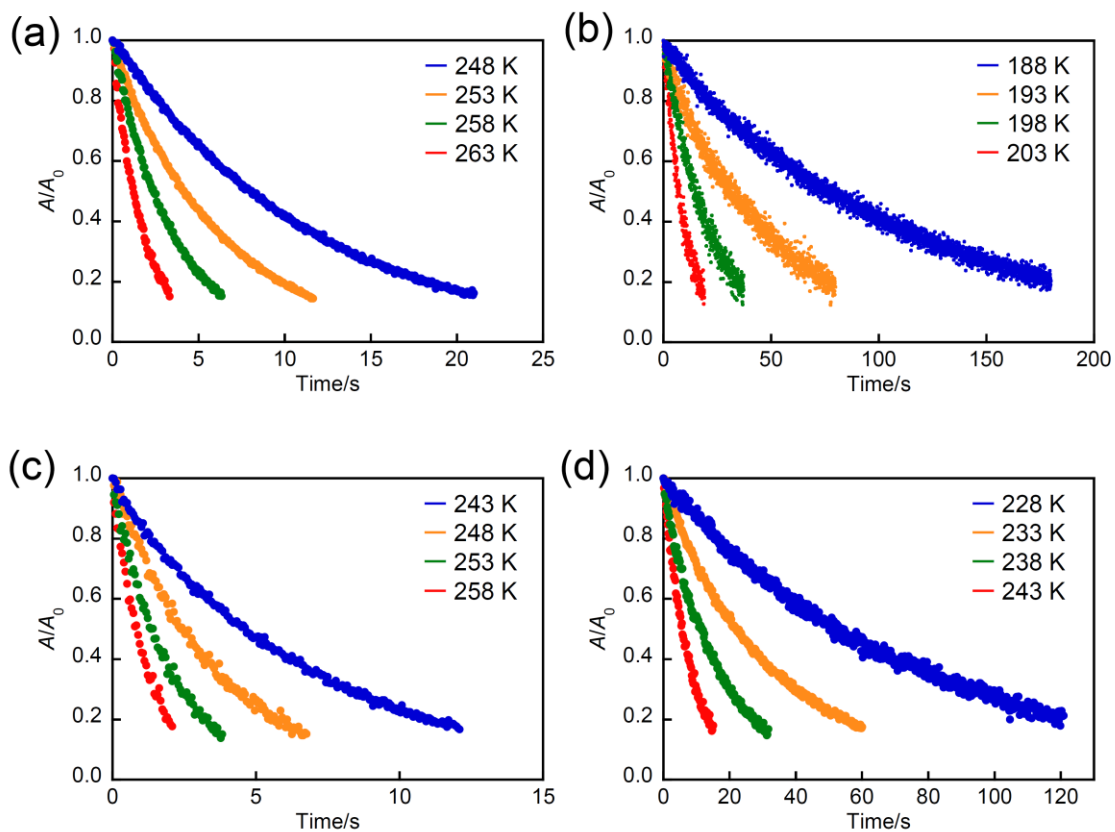

**Figure S2.** Absorbance decay curves at  $\lambda_{\max}$  for the closed-ring isomer of (a) **N4**, (b) **II**, (c) **I2**, and (d) **I4** in *n*-hexane at various temperatures.

### Kinetic analysis of thermal back reaction

The reaction kinetics of the thermal back reaction were analyzed in a manner similar to a procedure from [S1]. If the thermal back reaction from the closed-ring isomer to the open-ring isomer obeys a first-order kinetics, the kinetic equation is expressed as following equation by using Lambert–Beer law.

$$\ln \frac{A_t}{A_0} = -kt$$

where  $k$  is the reaction rate constant,  $t$  is reaction time, and  $A_0$  and  $A_t$  are absorbance of the closed-ring isomer at initial state ( $t = 0$  s) and at arbitrary reaction time  $t$ , respectively. The  $k$  value can be calculated from the slope of the linear plot. The calculated  $k$  values are summarized in Tables S1–S6.

Eyring equation can be described as follows.

$$\ln\left(\frac{k}{T}\right) = -\frac{\Delta H^\ddagger}{R} \frac{1}{T} + \ln\left(\frac{k_B}{h}\right) + \frac{\Delta S^\ddagger}{R}$$

where  $R$  is gas constant, and  $T$  is absolute temperature,  $\Delta H^\ddagger$  is enthalpy of activation,  $\Delta S^\ddagger$  is entropy of activation,  $h$  is Planck constant, and  $k_B$  is Boltzmann constant. The linear relationship can be obtained by plotting  $\ln(k/T)$  relative to  $1/T$  as shown in Figures 2c, 2f, and S4. The  $\Delta H^\ddagger$  and  $\Delta S^\ddagger$  values can be determined from the slope and intercept of the linear plot. The Gibbs energy of activation ( $\Delta G^\ddagger$ ) was also determined using the relationship of  $\Delta G^\ddagger = \Delta H^\ddagger - T\Delta S^\ddagger$ . The results are summarized in Table 1.

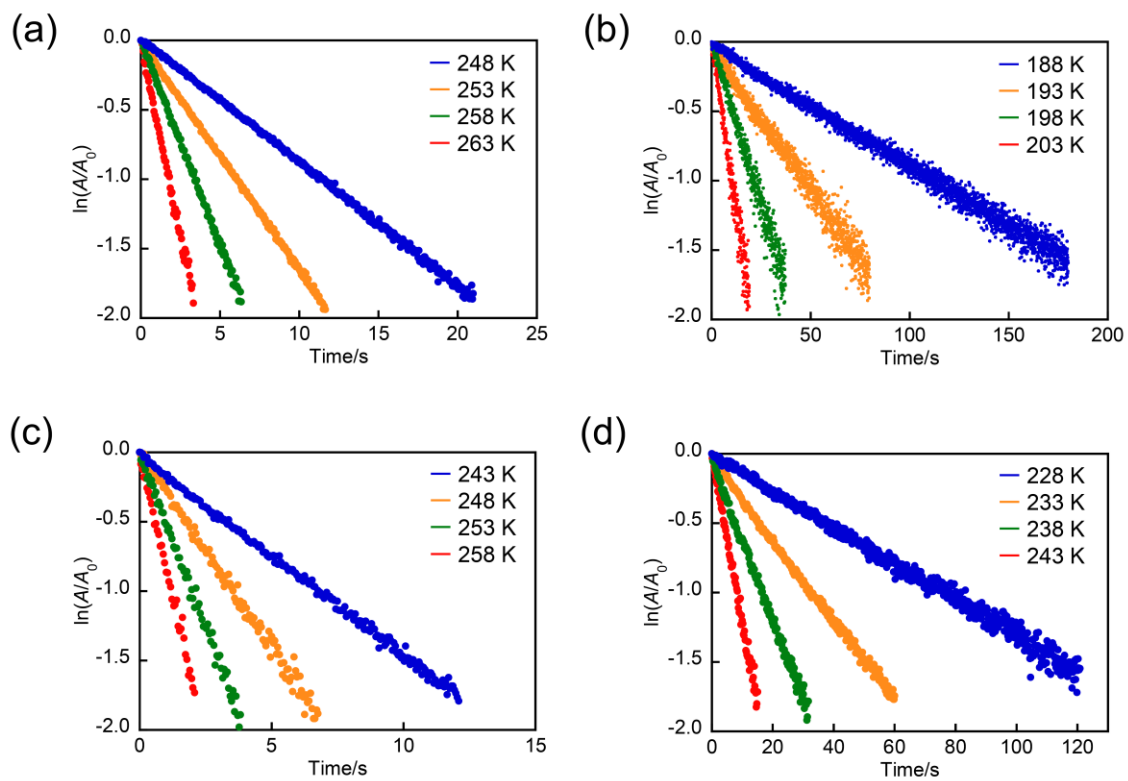

**Figure S3.** First-order kinetics profiles of (a) **N4**, (b) **I1**, (c) **I2**, and (d) **I4** in *n*-hexane at various temperatures.

**Table S1.** First-order rate constants for the thermal back reaction of **N3**.

| <i>T/K</i> | <i>k/s<sup>-1</sup></i> |
|------------|-------------------------|
| 268.15     | 2.7786                  |
| 263.15     | 1.6819                  |
| 258.15     | 0.99070                 |
| 253.15     | 0.58548                 |
| 248.15     | 0.33166                 |

**Table S2.** First-order rate constants for the thermal back reaction of **N4**.

| <i>T/K</i> | <i>k/s<sup>-1</sup></i> |
|------------|-------------------------|
| 263.15     | 0.56137                 |
| 258.15     | 0.29591                 |
| 253.15     | 0.16604                 |
| 248.15     | 0.088796                |

**Table S3.** First-order rate constants for the thermal back reaction of **I1**.

| <i>T/K</i> | <i>k/s<sup>-1</sup></i> |
|------------|-------------------------|
| 203.15     | 0.096947                |
| 198.15     | 0.047296                |
| 193.15     | 0.021232                |
| 188.15     | 0.0088692               |

**Table S4.** First-order rate constants for the thermal back reaction of **I2**.

| <i>T/K</i> | <i>k/s<sup>-1</sup></i> |
|------------|-------------------------|
| 258.15     | 0.82360                 |
| 253.15     | 0.50140                 |
| 248.15     | 0.28179                 |
| 243.15     | 0.14671                 |

**Table S5.** First-order rate constants for the thermal back reaction of **I3**.

| <i>T/K</i> | <i>k/s<sup>-1</sup></i> |
|------------|-------------------------|
| 218.15     | 0.23092                 |
| 213.15     | 0.11483                 |
| 208.15     | 0.046481                |
| 203.15     | 0.020947                |

**Table S6.** First-order rate constants for the thermal back reaction of **I4**.

| <i>T/K</i> | <i>k/s<sup>-1</sup></i> |
|------------|-------------------------|
| 243.15     | 0.12016                 |
| 238.15     | 0.059738                |
| 233.15     | 0.029971                |
| 228.15     | 0.013128                |

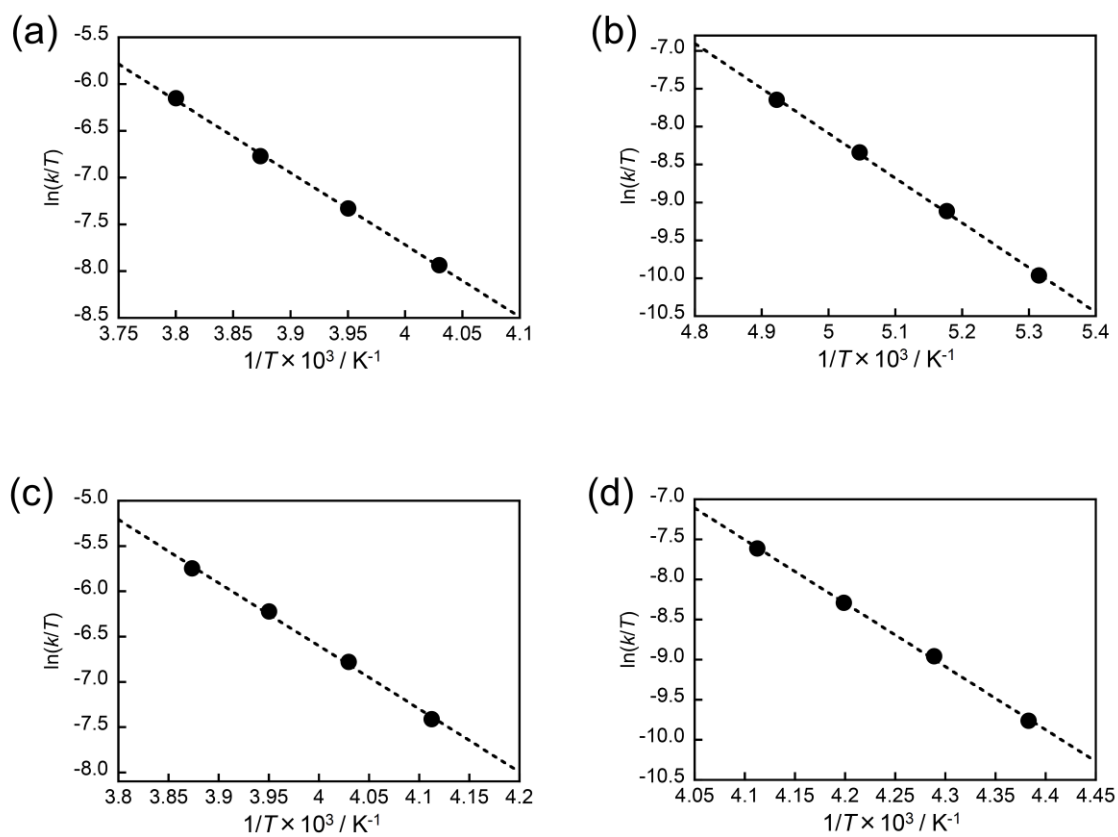

**Figure S4.** Temperature dependence of the rate constant ( $k$ ) for the thermal back reaction of (a) **N4**, (b) **II**, (c) **I2**, and (d) **I4**.



**Table S7.**  $\Delta G^\ddagger_{(\text{calcd})}$  values for the thermal back reaction of **N1** calculated by various functionals.

| Functional      | Energy(closed)/hartree | Energy(TS)/hartree | $\Delta G^\ddagger_{(\text{calcd})}/\text{kJ mol}^{-1}$ |
|-----------------|------------------------|--------------------|---------------------------------------------------------|
| B3LYP           | -2219.850078           | -2219.830002       | 52.70954201                                             |
| BMK             | -2218.878913           | -2218.850459       | 74.70598269                                             |
| CAMB3LYP        | -2219.25252            | -2219.226836       | 67.43334714                                             |
| M05             | -2219.11833            | -2219.098226       | 52.78305602                                             |
| M06             | -2219.034041           | -2219.010424       | 62.00643822                                             |
| M05-2x          | -2219.705172           | -2219.679122       | 68.39428021                                             |
| M06-2x          | -2219.268477           | -2219.242634       | 67.85080167                                             |
| MPW1PW91        | -2219.555087           | -2219.531743       | 61.28967667                                             |
| $\omega$ B97X-D | -2219.401133           | -2219.374696       | 69.41034879                                             |

**Table S8.**  $\Delta G^\ddagger_{(\text{calcd})}$  values for the thermal back reaction of **N2** calculated by various functionals.

| Functional      | Energy(closed)/hartree | Energy(TS)/hartree | $\Delta G^\ddagger_{(\text{calcd})}/\text{kJ mol}^{-1}$ |
|-----------------|------------------------|--------------------|---------------------------------------------------------|
| B3LYP           | -2235.909998           | -2235.888727       | 55.84701476                                             |
| BMK             | -2234.943358           | -2234.913817       | 77.55990141                                             |
| CAMB3LYP        | -2235.314216           | -2235.28719        | 70.95676841                                             |
| M05             | -2235.184903           | -2235.163601       | 55.92840526                                             |
| M06             | -2235.096344           | -2235.071147       | 66.15472854                                             |
| M05-2x          | -2235.762666           | -2235.734993       | 72.65546703                                             |
| M06-2x          | -2235.326503           | -2235.299103       | 71.93870548                                             |
| MPW1PW91        | -2235.610396           | -2235.585645       | 64.98375545                                             |
| $\omega$ B97X-D | -2235.455080           | -2235.427073       | 73.53238410                                             |

**Table S9.**  $\Delta G^\ddagger_{(\text{calcd})}$  values for the thermal back reaction of **N3** calculated by various functionals.

| Functional      | Energy(closed)/hartree | Energy(TS)/hartree | $\Delta G^\ddagger_{(\text{calcd})}/\text{kJ mol}^{-1}$ |
|-----------------|------------------------|--------------------|---------------------------------------------------------|
| B3LYP           | -2142.473906           | -2142.452865       | 55.24314971                                             |
| BMK             | -2141.560936           | -2141.531075       | 78.40006147                                             |
| CAMB3LYP        | -2141.926479           | -2141.899096       | 71.89407198                                             |
| M05             | -2141.807472           | -2141.786641       | 54.69179467                                             |
| M06             | -2141.720812           | -2141.697114       | 62.21910374                                             |
| M05-2x          | -2142.340784           | -2142.313707       | 71.09066892                                             |
| M06-2x          | -2141.930246           | -2141.903082       | 71.31908743                                             |
| MPW1PW91        | -2142.198475           | -2142.174382       | 63.25617632                                             |
| $\omega$ B97X-D | -2142.054623           | -2142.026967       | 72.61083353                                             |

**Table S10.**  $\Delta G^\ddagger_{(\text{calcd})}$  values for the thermal back reaction of **N4** calculated by various functionals.

| Functional      | Energy(closed)/hartree | Energy(TS)/hartree | $\Delta G^\ddagger_{(\text{calcd})}/\text{kJ mol}^{-1}$ |
|-----------------|------------------------|--------------------|---------------------------------------------------------|
| B3LYP           | -1819.501278           | -1819.480961       | 53.34228756                                             |
| BMK             | -1818.684947           | -1818.657711       | 71.50812345                                             |
| CAMB3LYP        | -1818.940022           | -1818.913564       | 69.46548429                                             |
| M05             | -1818.809089           | -1818.789033       | 52.65703201                                             |
| M06             | -1818.748308           | -1818.725300       | 60.40750860                                             |
| M05-2x          | -1819.379875           | -1819.352976       | 70.62332988                                             |
| M06-2x          | -1818.963865           | -1818.937695       | 68.70934023                                             |
| MPW1PW91        | -1819.200959           | -1819.177167       | 62.46590076                                             |
| $\omega$ B97X-D | -1819.076335           | -1819.049735       | 69.83830532                                             |

**Table S11.**  $\Delta G^\ddagger_{(\text{calcd})}$  values for the thermal back reaction of **I1** calculated by various functionals.

| Functional      | Energy(closed)/hartree | Energy(TS)/hartree | $\Delta G^\ddagger_{(\text{calcd})}/\text{kJ mol}^{-1}$ |
|-----------------|------------------------|--------------------|---------------------------------------------------------|
| B3LYP           | -2219.837618           | -2219.822445       | 39.83671                                                |
| BMK             | -2218.867411           | -2218.843667       | 62.33988                                                |
| CAMB3LYP        | -2219.242852           | -2219.220579       | 58.47777                                                |
| M05             | -2219.108242           | -2219.092197       | 42.12615                                                |
| M06             | -2219.022557           | -2219.004122       | 48.40110                                                |
| M05-2x          | -2219.695076           | -2219.672165       | 60.15284                                                |
| M06-2x          | -2219.258380           | -2219.235792       | 59.30480                                                |
| MPW1PW91        | -2219.543017           | -2219.524413       | 48.84481                                                |
| $\omega$ B97X-D | -2219.392333           | -2219.368678       | 62.10621                                                |

**Table S12.**  $\Delta G^\ddagger_{(\text{calcd})}$  values for the thermal back reaction of **I2** calculated by various functionals.

| Functional      | Energy(closed)/hartree | Energy(TS)/hartree | $\Delta G^\ddagger_{(\text{calcd})}/\text{kJ mol}^{-1}$ |
|-----------------|------------------------|--------------------|---------------------------------------------------------|
| B3LYP           | -2235.909189           | -2235.890671       | 48.61901                                                |
| BMK             | -2234.942664           | -2234.914845       | 73.03879                                                |
| CAMB3LYP        | -2235.316345           | -2235.290497       | 67.86393                                                |
| M05             | -2235.186029           | -2235.166787       | 50.51987                                                |
| M06             | -2235.096425           | -2235.074298       | 58.09444                                                |
| M05-2x          | -2235.763844           | -2235.738292       | 67.08678                                                |
| M06-2x          | -2235.327432           | -2235.301752       | 67.42285                                                |
| MPW1PW91        | -2235.609811           | -2235.587721       | 57.99730                                                |
| $\omega$ B97X-D | -2235.457182           | -2235.430100       | 71.10380                                                |

**Table S13.**  $\Delta G^\ddagger_{(\text{calcd})}$  values for the thermal back reaction of **I3** calculated by various functionals.

| Functional      | Energy(closed)/hartree | Energy(TS)/hartree | $\Delta G^\ddagger_{(\text{calcd})}/\text{kJ mol}^{-1}$ |
|-----------------|------------------------|--------------------|---------------------------------------------------------|
| B3LYP           | -2142.462843           | -2142.447063       | 41.43039                                                |
| BMK             | -2141.550084           | -2141.526487       | 61.95393                                                |
| CAMB3LYP        | -2141.916587           | -2141.893481       | 60.66481                                                |
| M05             | -2141.798519           | -2141.781101       | 45.73096                                                |
| M06             | -2141.711411           | -2141.691621       | 51.95865                                                |
| M05-2x          | -2142.331467           | -2142.307798       | 62.14296                                                |
| M06-2x          | -2141.921024           | -2141.897261       | 62.38976                                                |
| MPW1PW91        | -2142.188328           | -2142.168441       | 52.21332                                                |
| $\omega$ B97X-D | -2142.046331           | -2142.021823       | 64.34576                                                |

**Table S14.**  $\Delta G^\ddagger_{(\text{calcd})}$  values for the thermal back reaction of **I4** calculated by various functionals.

| Functional      | Energy(closed)/hartree | Energy(TS)/hartree | $\Delta G^\ddagger_{(\text{calcd})}/\text{kJ mol}^{-1}$ |
|-----------------|------------------------|--------------------|---------------------------------------------------------|
| B3LYP           | -1819.480062           | -1819.461538       | 48.63477                                                |
| BMK             | -1818.665876           | -1818.638035       | 73.09655                                                |
| CAMB3LYP        | -1818.920004           | -1818.893345       | 69.99321                                                |
| M05             | -1818.788685           | -1818.768481       | 53.04561                                                |
| M06             | -1818.72886            | -1818.706397       | 58.97661                                                |
| M05-2x          | -1819.359613           | -1819.332649       | 70.79399                                                |
| M06-2x          | -1818.944392           | -1818.917309       | 71.10642                                                |
| MPW1PW91        | -1819.180423           | -1819.157921       | 59.07901                                                |
| $\omega$ B97X-D | -1819.058532           | -1819.030614       | 73.29871                                                |

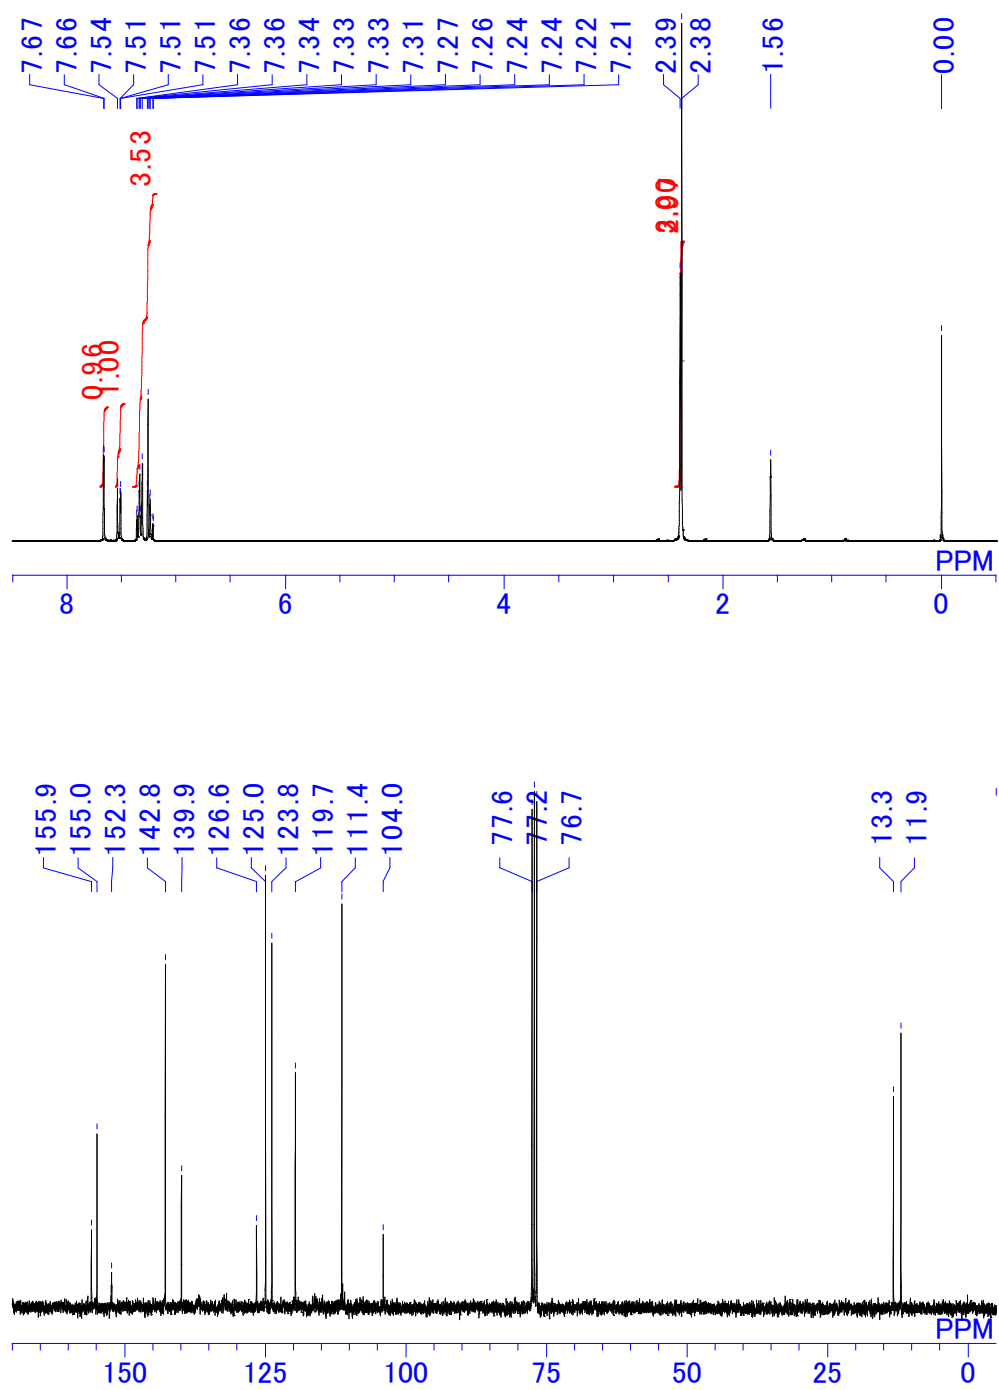

Figure S5. <sup>1</sup>H NMR and <sup>13</sup>C NMR spectra for the open-ring isomer of N4 in CDCl<sub>3</sub>.

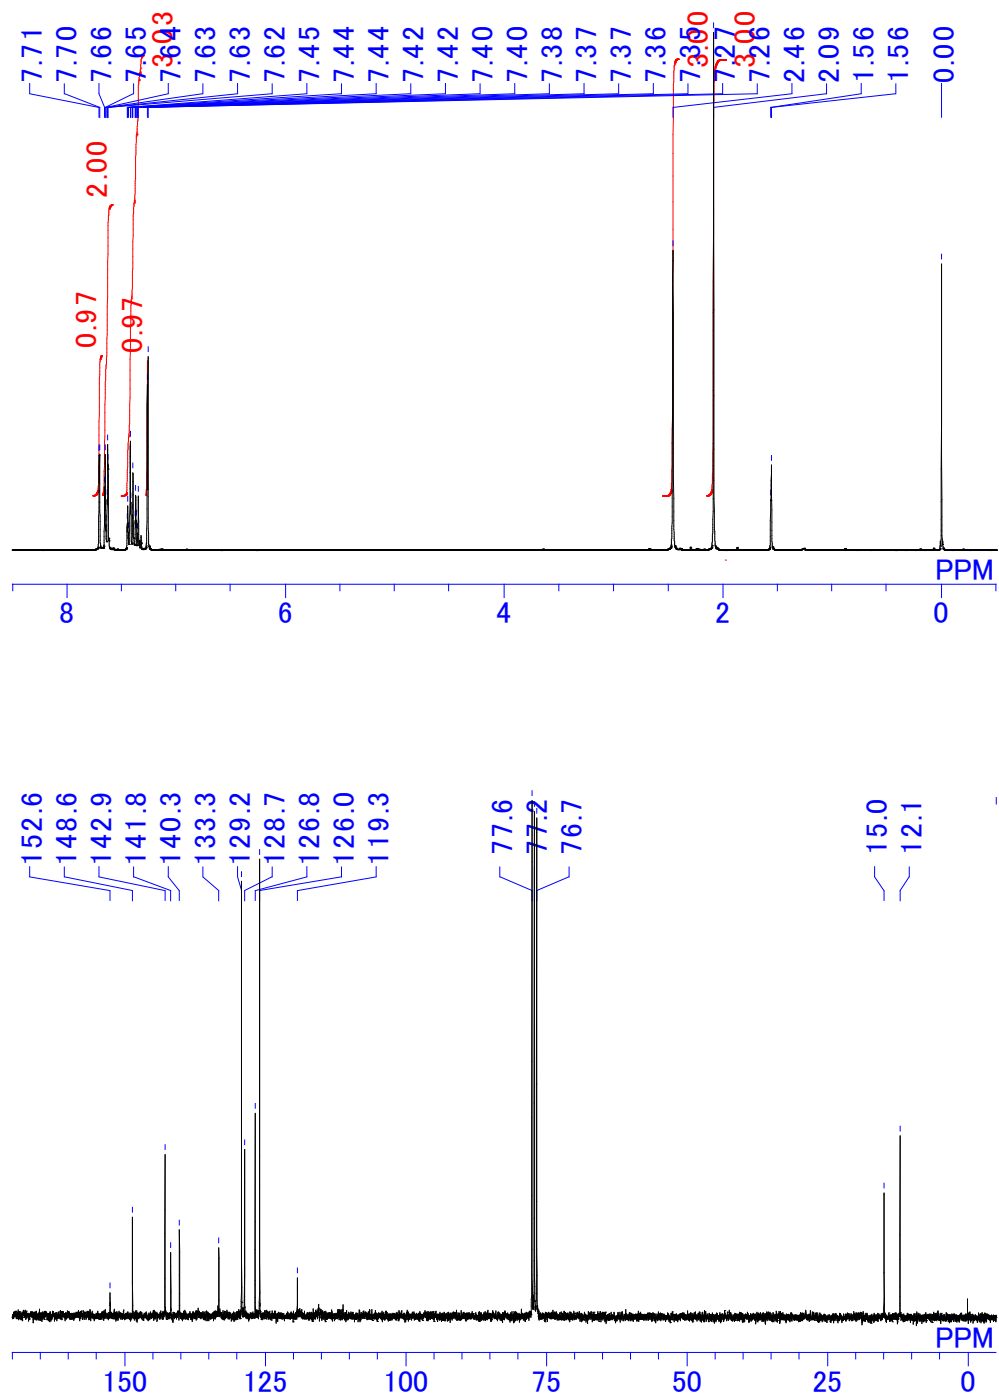

Figure S6. <sup>1</sup>H NMR and <sup>13</sup>C NMR spectra for the open-ring isomer of **II** in CDCl<sub>3</sub>.

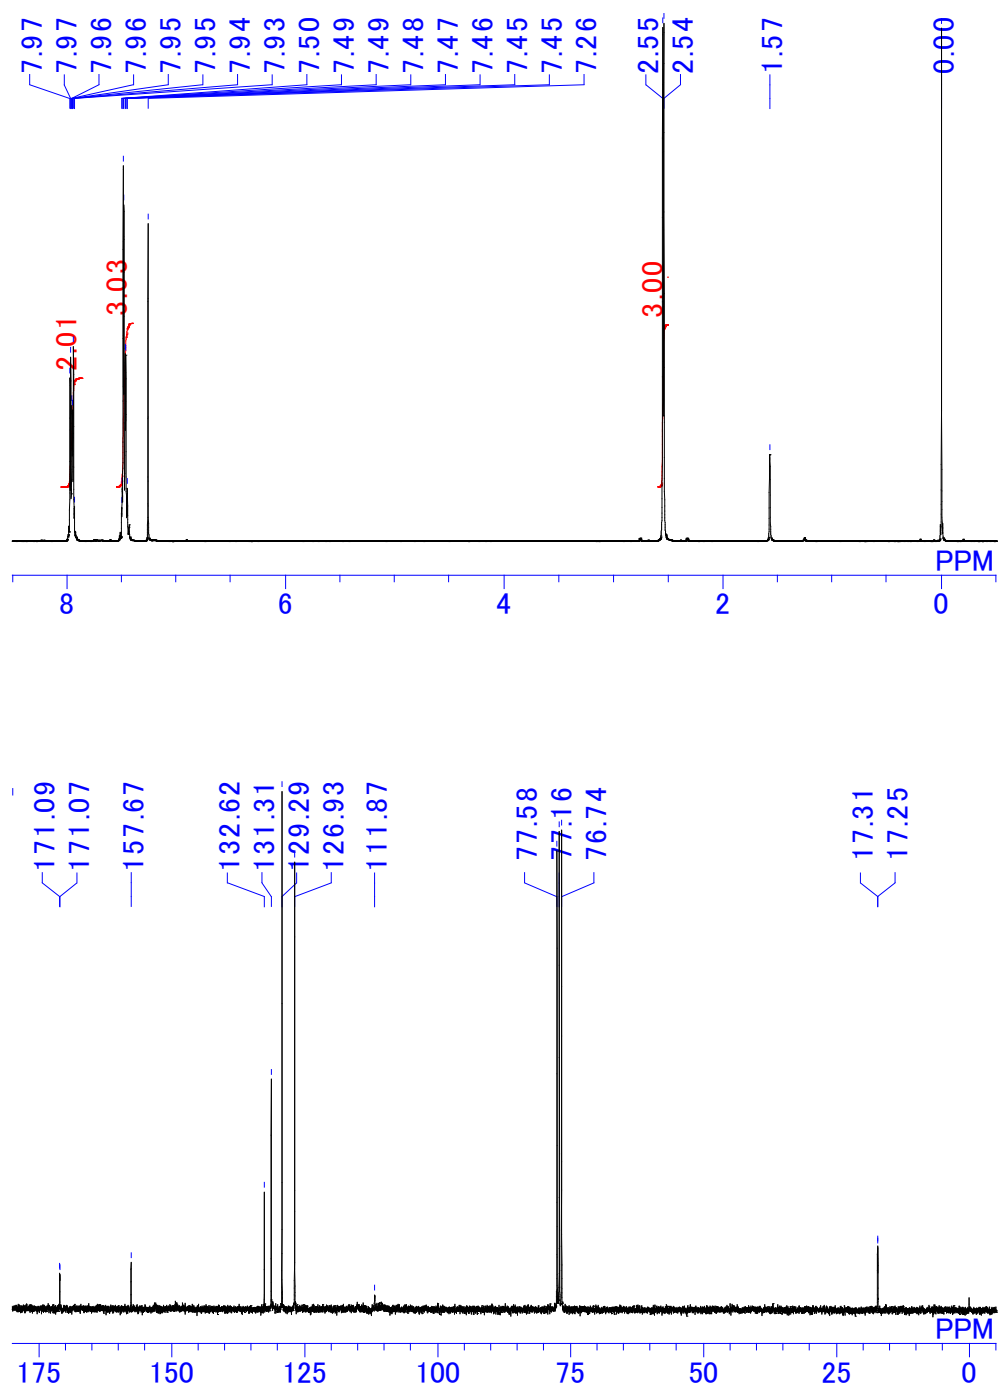

Figure S7. <sup>1</sup>H NMR and <sup>13</sup>C NMR spectra of **12(a)** in CDCl<sub>3</sub>.

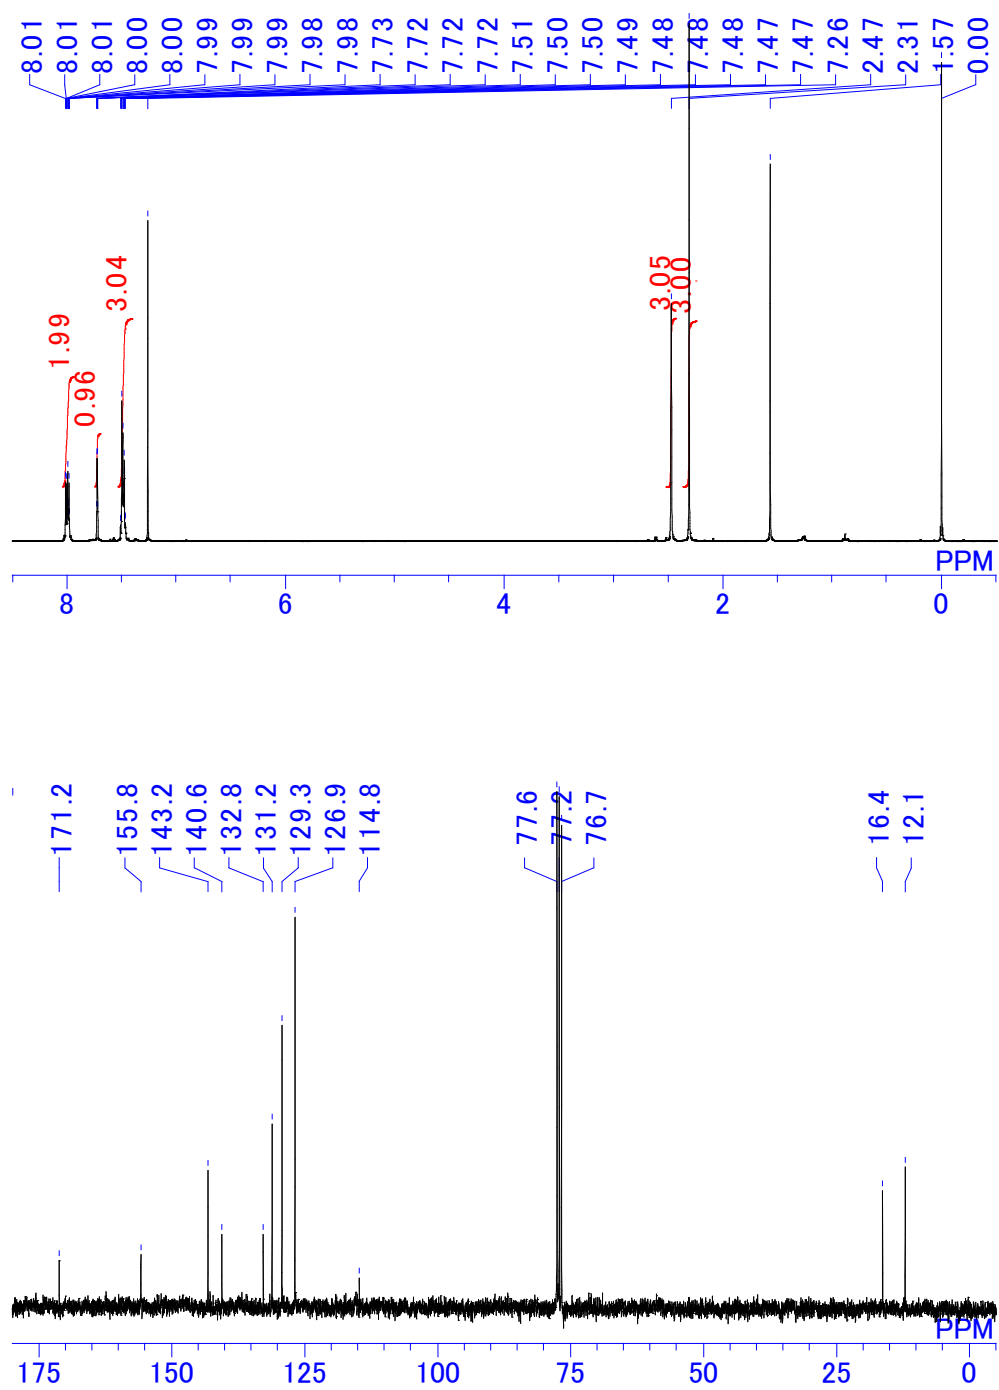

Figure S8.  $^1\text{H}$  NMR and  $^{13}\text{C}$  NMR spectra for the open-ring isomer of **12** in  $\text{CDCl}_3$ .

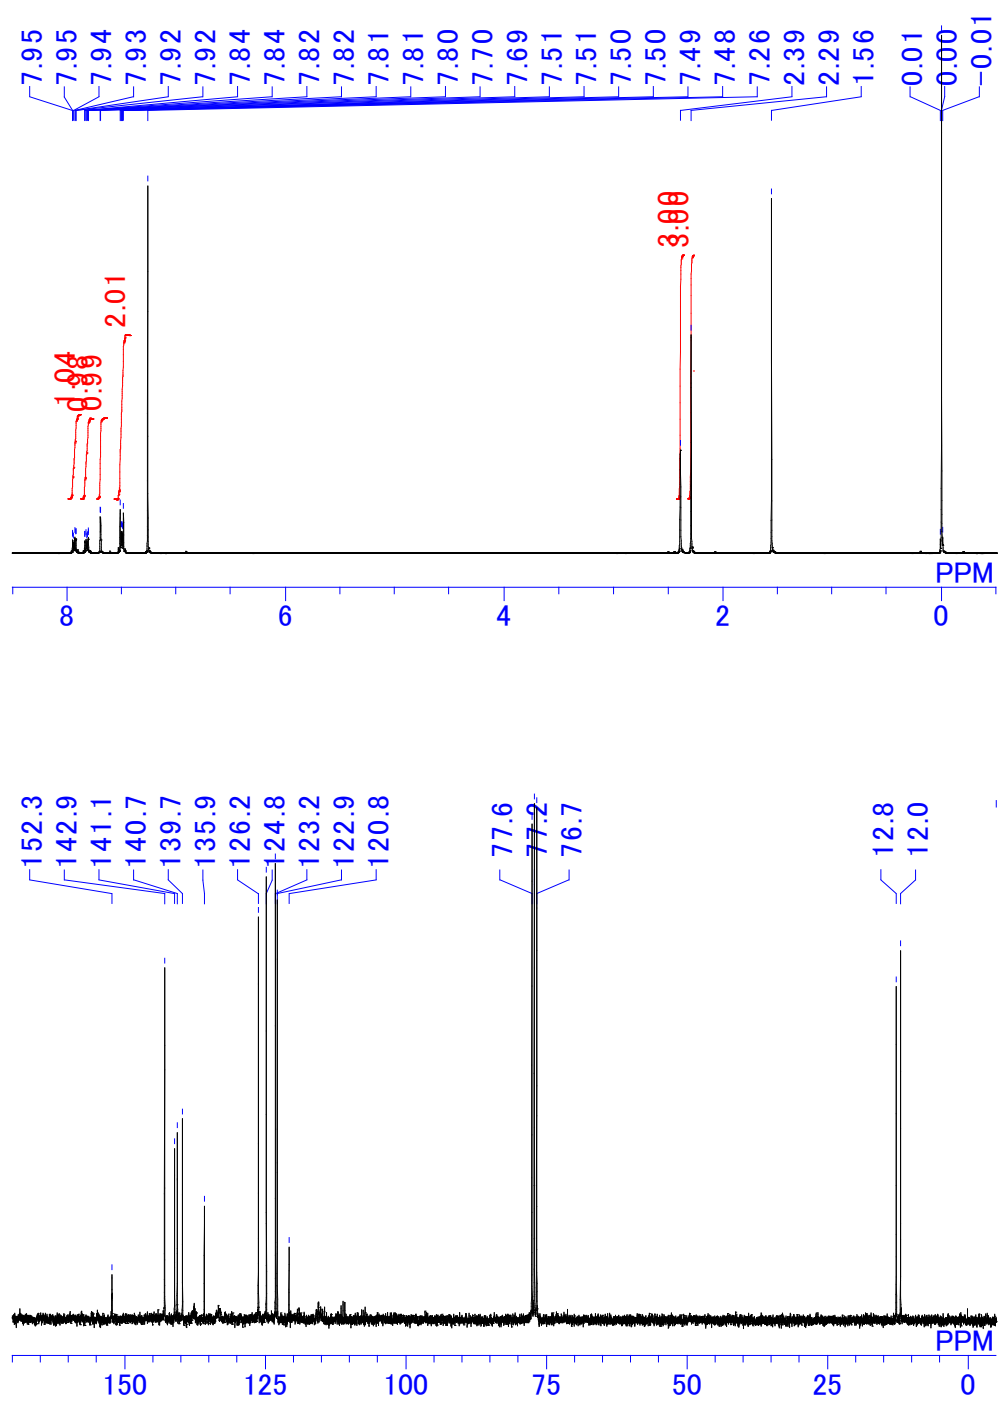

Figure S9. <sup>1</sup>H NMR and <sup>13</sup>C NMR spectra for the open-ring isomer of **13** in CDCl<sub>3</sub>.



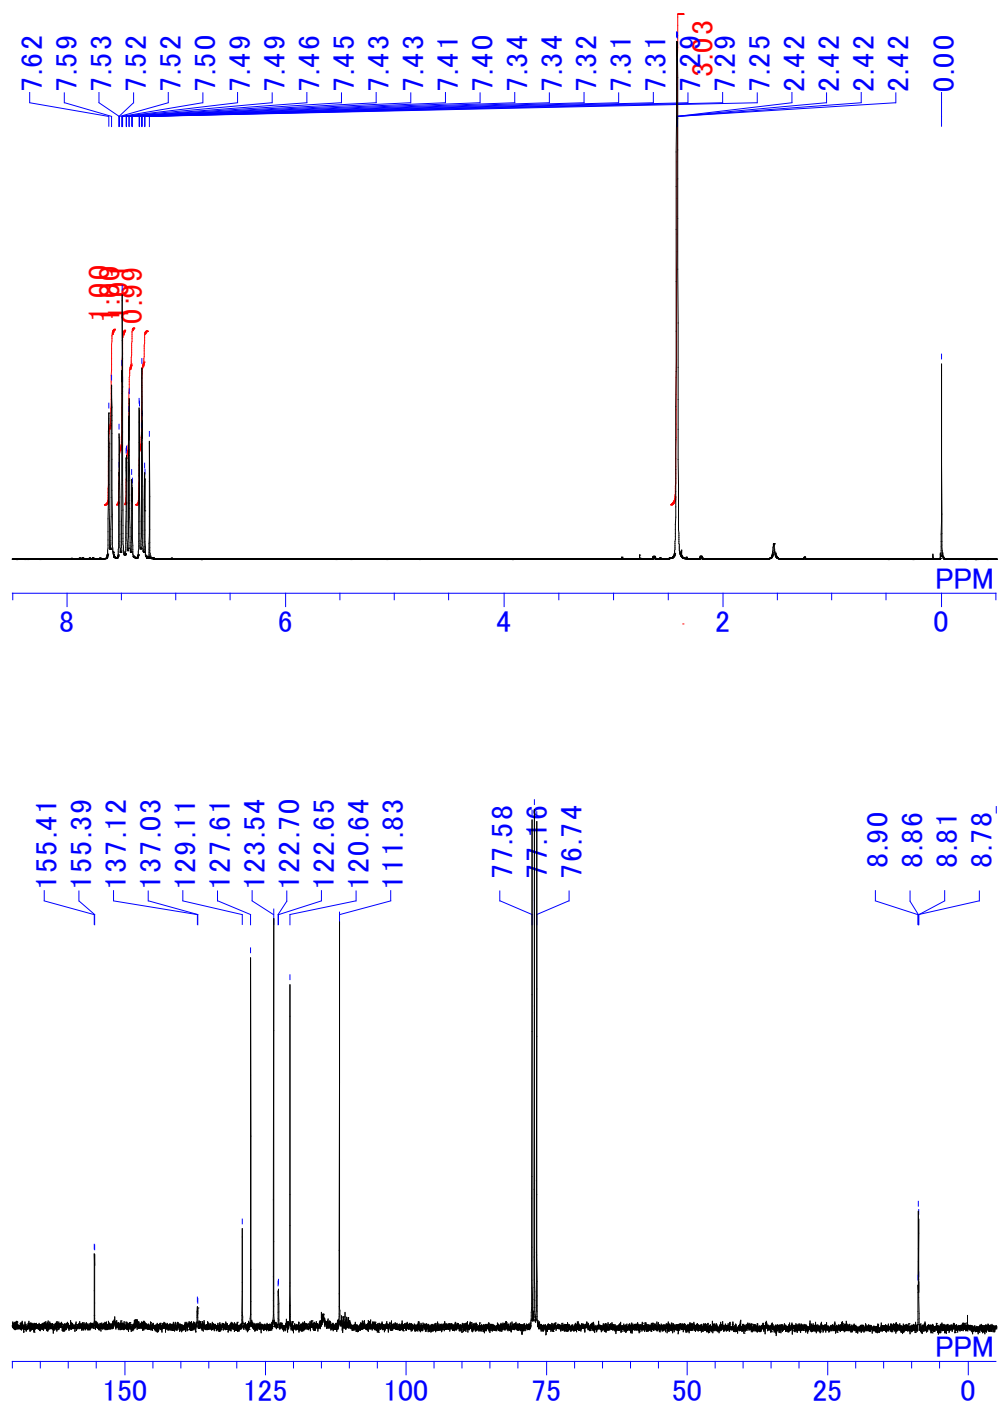

Figure S10. <sup>1</sup>H NMR and <sup>13</sup>C NMR spectra of **I4(a)** in CDCl<sub>3</sub>.

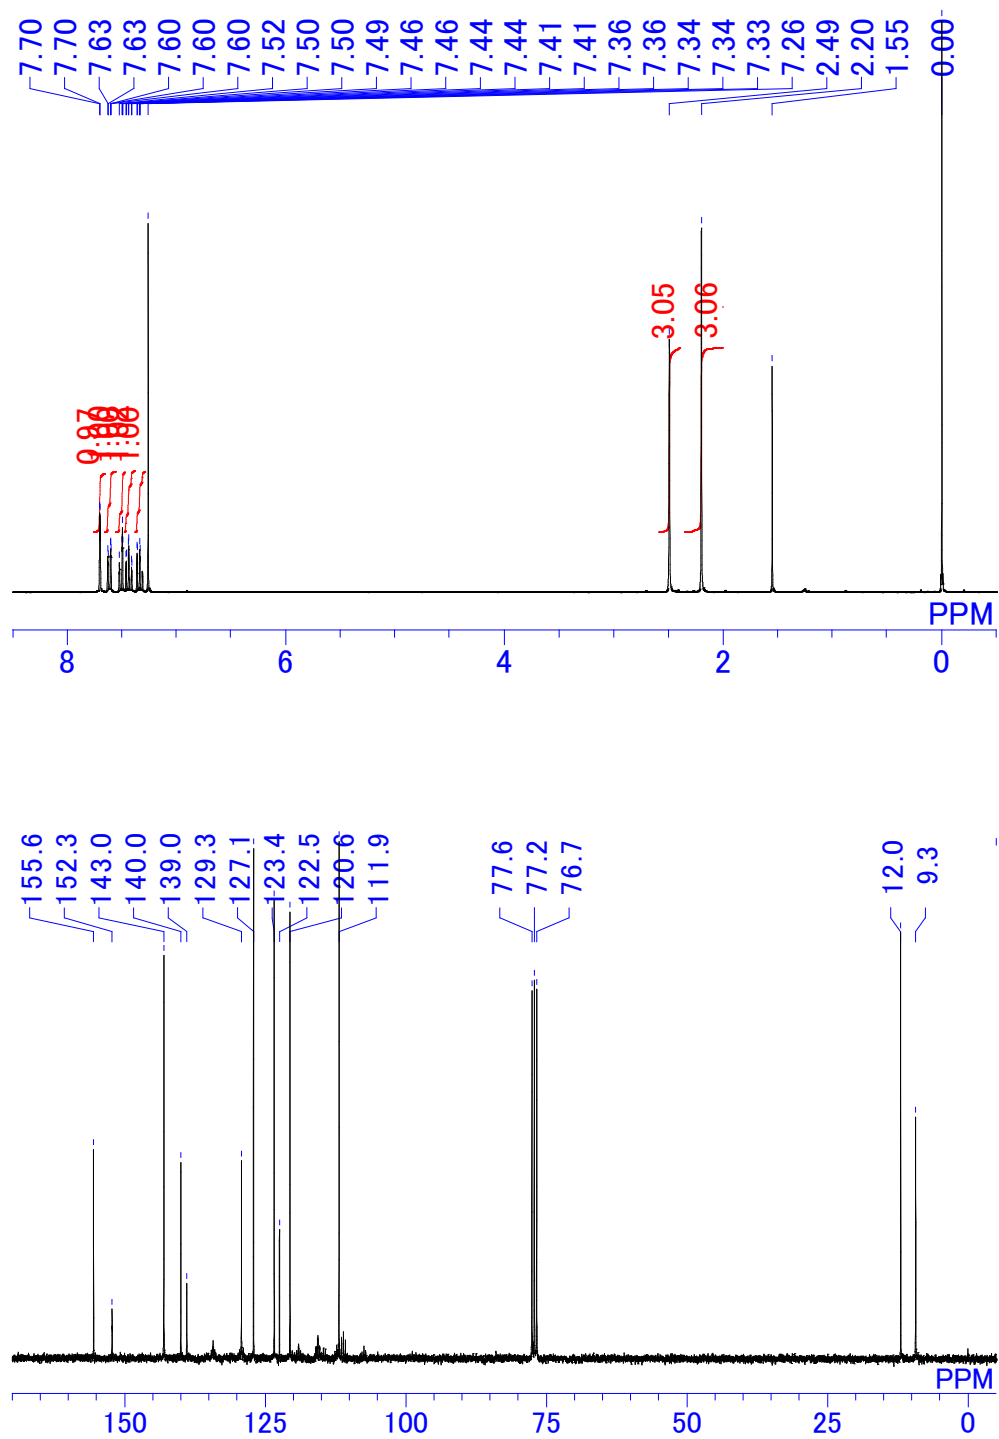

Figure S11. <sup>1</sup>H NMR and <sup>13</sup>C NMR spectra for the open-ring isomer of **14** in CDCl<sub>3</sub>.

## References

- (S1) Kitagawa, D.; Takahashi, N.; Nakahama, T.; Kobatake, S. *Photochem. Photobiol. Sci.* **2020**, *19*, 644–653. doi:10.1039/d0pp00024h
