# Supplementary material for: Effect of substitution position of aryl groups on the thermal back reactivity of aza-diarylethene photoswitches and prediction by density functional theory
Source: Beilstein J Org Chem. 2025 Jan 31;21:242–52. doi: 10.3762/bjoc.21.16 (PMC11789678; doi:10.3762/bjoc.21.16)
Supplement: File 3 — Cartesian coordinates in DFT calculations. [file Beilstein_J_Org_Chem-21-242-s003.xlsx]

## Sheet: B3LYP
1	Table of Contents
2	Structure				Row
3	Closed-ring isomer of N1				21
4	Transition state of N1				65
5	Closed-ring isomer of N2				109
6	Transition state of N2				152
7	Closed-ring isomer of N3				195
8	Transition state of N3				235
9	Closed-ring isomer of N4				275
10	Transition state of N4				315
11	Closed-ring isomer of I1				355
12	Transition state of I1				399
13	Closed-ring isomer of I2				443
14	Transition state of I2				486
15	Closed-ring isomer of I3				529
16	Transition state of I3				569
17	Closed-ring isomer of I4				609
18	Transition state of I4				649
19
20	Structure	Atom	x	y	z
21	Closed-ring isomer of N1
22		C	0.810034	-0.956365	0.35922
23		C	2.00957	-0.178587	0.223444
24		C	-0.411077	-0.371054	0.509531
25		C	1.8932	1.17671	0.020591
26		C	-2.71379	0.034674	0.188038
27		C	1.90529	3.63908	-0.511712
28		N	0.672174	1.80514	0.16795
29		C	-0.42592	1.11268	0.879042
30		C	-0.280192	1.31833	2.39661
31		H	-0.336109	2.38089	2.65579
32		H	-1.08164	0.786848	2.91663
33		H	0.682783	0.918293	2.73338
34		C	0.707189	3.16998	-0.11477
35		S	3.09808	2.32142	-0.545026
36		C	2.28106	5.03232	-0.903797
37		H	3.08341	5.4284	-0.269363
38		H	2.62739	5.08168	-1.94335
39		H	1.41494	5.69406	-0.806028
40		C	-4.13061	-0.192971	-0.103269
41		C	-5.0979	0.800834	0.137982
42		C	-4.56355	-1.42361	-0.638674
43		C	-6.44454	0.571739	-0.138186
44		H	-4.79547	1.7524	0.565774
45		C	-5.90914	-1.65126	-0.905484
46		H	-3.83607	-2.19647	-0.866057
47		C	-6.85828	-0.654973	-0.65773
48		H	-7.17221	1.35406	0.059956
49		H	-6.21797	-2.60694	-1.32034
50		H	-7.90812	-0.833592	-0.872608
51		C	3.19716	-1.04936	0.043732
52		C	1.14628	-2.41166	0.194848
53		C	2.58114	-2.40558	-0.41042
54		F	3.90478	-1.25694	1.202
55		F	4.09296	-0.576273	-0.87298
56		F	3.31074	-3.47114	-0.026413
57		F	2.48359	-2.40641	-1.76454
58		F	0.275155	-3.09262	-0.601096
59		F	1.17874	-3.06191	1.39736
60		H	-0.20226	3.74667	-0.01313
61		S	-2.10303	1.71697	0.318649
62		C	-1.72779	-0.895708	0.325186
63		H	-1.90735	-1.96	0.231585
64
65	Transition state of N1
66		C	0.925861	-0.932978	0.473117
67		C	1.99269	-0.045914	0.26933
68		C	-0.374535	-0.516598	0.793216
69		C	1.75563	1.34434	0.126537
70		C	-2.68625	-0.208523	0.409423
71		C	1.40255	3.67462	-0.696852
72		N	0.664609	1.93354	0.630345
73		C	-0.542062	0.744523	1.50598
74		C	0.06266	0.933792	2.88448
75		H	-0.010732	1.97552	3.21099
76		H	-0.476601	0.303765	3.59994
77		H	1.11499	0.639342	2.88496
78		C	0.438163	3.19764	0.133299
79		S	2.63043	2.43731	-0.9409
80		C	1.5215	5.03701	-1.30651
81		H	2.39911	5.57682	-0.930729
82		H	1.60829	4.98437	-2.39816
83		H	0.633172	5.62942	-1.06691
84		C	-4.03653	-0.365361	-0.130353
85		C	-4.50319	-1.63838	-0.517272
86		C	-4.90813	0.729938	-0.279162
87		C	-5.77902	-1.80091	-1.04722
88		H	-3.86391	-2.50591	-0.383637
89		C	-6.18769	0.561961	-0.804375
90		H	-4.57513	1.72501	0.003605
91		C	-6.63068	-0.702442	-1.19453
92		H	-6.11465	-2.79317	-1.33697
93		H	-6.83906	1.42531	-0.911692
94		H	-7.62906	-0.833059	-1.60237
95		C	3.24159	-0.770868	-0.097799
96		C	1.36488	-2.33865	0.146241
97		C	2.74135	-2.16905	-0.554839
98		F	4.10019	-0.925596	0.95906
99		F	3.95746	-0.157742	-1.08826
100		F	3.60258	-3.16056	-0.253884
101		F	2.55257	-2.14525	-1.89847
102		F	0.490864	-3.00949	-0.657622
103		F	1.5217	-3.08742	1.27633
104		H	-0.437889	3.74091	0.467594
105		S	-2.25745	1.22591	1.39084
106		H	-1.63006	-1.91958	-0.353828
107		C	-1.60325	-1.02094	0.249188
108
109	Closed-ring isomer of N2
110		C	0.684728	-0.943582	0.342352
111		C	1.94402	-0.264647	0.225194
112		C	-0.47452	-0.252731	0.507773
113		C	1.94636	1.09683	0.031435
114		C	-2.62742	0.210985	0.178925
115		C	2.17604	3.55021	-0.494592
116		N	0.782709	1.82836	0.168697
117		C	-0.373113	1.23818	0.874648
118		C	-0.231993	1.44881	2.39147
119		H	-0.226216	2.51479	2.64246
120		H	-1.06752	0.970719	2.90994
121		H	0.702233	0.995117	2.74078
122		C	0.937504	3.18607	-0.112279
123		S	3.25207	2.13579	-0.513254
124		C	2.67498	4.90595	-0.88097
125		H	3.50236	5.23002	-0.238007
126		H	3.03456	4.92538	-1.91693
127		H	1.86877	5.64041	-0.790603
128		C	-4.04226	-0.038511	-0.09581
129		C	-4.98668	1.00075	-0.141928
130		C	-4.46921	-1.36113	-0.32698
131		C	-6.32455	0.726703	-0.418559
132		H	-4.67962	2.02495	0.051196
133		C	-5.80617	-1.62809	-0.597258
134		H	-3.7342	-2.15799	-0.294507
135		C	-6.73893	-0.586581	-0.64589
136		H	-7.04431	1.53981	-0.450692
137		H	-6.1239	-2.65175	-0.775111
138		H	-7.78293	-0.799105	-0.859162
139		C	3.06047	-1.2293	0.06607
140		C	0.89475	-2.42293	0.150676
141		C	2.34661	-2.52657	-0.412666
142		F	3.71945	-1.49771	1.24005
143		F	4.01323	-0.822881	-0.824737
144		F	2.97621	-3.64954	-0.015992
145		F	2.29039	-2.51126	-1.76902
146		F	0.007398	-3.00898	-0.687889
147		F	0.839458	-3.09081	1.34135
148		H	0.078753	3.83716	-0.01851
149		N	-1.74738	-0.723849	0.326068
150		S	-1.99795	1.91214	0.271519
151
152	Transition state of N2
153		C	0.798803	-0.905441	0.502548
154		C	1.93746	-0.119457	0.288261
155		C	-0.453978	-0.361731	0.815481
156		C	1.82617	1.28201	0.095472
157		C	-2.61825	-0.010609	0.40213
158		C	1.69466	3.5997	-0.823134
159		N	0.789182	1.98733	0.5619
160		C	-0.522026	0.93746	1.4796
161		C	0.089286	1.14286	2.85227
162		H	0.115693	2.20179	3.12466
163		H	-0.512098	0.604546	3.59285
164		H	1.10811	0.748586	2.87843
165		C	0.682903	3.246	0.012589
166		S	2.80753	2.24862	-0.999943
167		C	1.94231	4.91986	-1.48486
168		H	2.86184	5.39278	-1.1195
169		H	2.03396	4.81485	-2.57227
170		H	1.10927	5.59936	-1.28054
171		C	-3.95857	-0.229006	-0.141265
172		C	-4.22819	-1.42816	-0.829389
173		C	-4.98718	0.716848	0.002142
174		C	-5.49325	-1.66667	-1.35434
175		H	-3.4303	-2.15456	-0.940303
176		C	-6.25174	0.473605	-0.53041
177		H	-4.80356	1.64758	0.5329
178		C	-6.51077	-0.718031	-1.20922
179		H	-5.68762	-2.59635	-1.8823
180		H	-7.03613	1.21598	-0.411316
181		H	-7.4978	-0.907615	-1.62195
182		C	3.12494	-0.962137	-0.033154
183		C	1.10728	-2.35583	0.209962
184		C	2.51247	-2.32476	-0.459329
185		F	3.94604	-1.15468	1.04642
186		F	3.90853	-0.442162	-1.02558
187		F	3.2783	-3.37573	-0.106207
188		F	2.35995	-2.32668	-1.80746
189		F	0.203727	-2.96176	-0.595184
190		F	1.17847	-3.08016	1.36611
191		H	-0.141189	3.88102	0.315735
192		S	-2.19719	1.51212	1.29419
193		N	-1.63415	-0.839956	0.295332
194
195	Closed-ring isomer of N3
196		C	-0.123694	-0.844112	0.199788
197		C	1.27697	-0.510257	0.241875
198		C	-1.09607	0.102874	0.277014
199		C	1.6457	0.802417	0.083641
200		C	-3.10058	1.30415	-0.217409
201		C	2.54222	3.11596	-0.343636
202		N	0.692201	1.79692	0.085559
203		C	-0.654029	1.52707	0.633843
204		C	-0.655658	1.75469	2.15566
205		H	-0.387759	2.78788	2.39994
206		H	-1.64966	1.54524	2.55984
207		H	0.064773	1.07736	2.62866
208		C	1.21252	3.07192	-0.136602
209		S	-1.92788	2.64159	-0.175747
210		S	3.22898	1.47879	-0.255811
211		C	-2.53478	0.038767	0.058631
212		C	3.40629	4.30291	-0.627453
213		H	4.19524	4.41749	0.125852
214		H	3.89364	4.22497	-1.60692
215		H	2.80091	5.21454	-0.624378
216		C	2.13325	-1.71731	0.243318
217		C	-0.249992	-2.33118	-0.029828
218		C	1.20264	-2.81813	-0.335909
219		F	2.53414	-2.09936	1.5016
220		F	3.27492	-1.5857	-0.495988
221		F	1.44696	-4.04029	0.176385
222		F	1.37347	-2.8658	-1.68072
223		F	-1.07537	-2.65899	-1.06016
224		F	-0.720098	-2.98058	1.07882
225		H	0.539025	3.91841	-0.136185
226		C	-4.45443	1.45528	-0.502833
227		C	-3.38123	-1.08129	0.082015
228		H	-2.98353	-2.0577	0.32896
229		H	-4.86885	2.43608	-0.716914
230		C	-4.73843	-0.93339	-0.195586
231		C	-5.27305	0.323729	-0.495238
232		H	-5.38605	-1.80495	-0.170341
233		H	-6.33289	0.428067	-0.709752
234
235	Transition state of N3
236		C	0.147621	-0.864551	0.313263
237		C	1.3289	-0.106803	0.264039
238		C	-1.11868	-0.304407	0.530783
239		C	1.2745	1.30271	0.113202
240		C	-3.35792	0.382833	0.065874
241		C	1.30802	3.6572	-0.706646
242		N	0.22121	2.01994	0.508148
243		C	-1.16448	0.938868	1.28455
244		C	-0.605513	1.01206	2.69324
245		H	-0.559317	2.04592	3.04786
246		H	-1.26177	0.442202	3.35995
247		H	0.396448	0.579951	2.73808
248		C	0.20835	3.30392	0.011517
249		S	-2.77824	1.69119	1.11736
250		S	2.3874	2.27269	-0.839032
251		C	-2.39054	-0.63291	-0.107196
252		C	1.66065	4.99399	-1.28147
253		H	2.55669	5.41666	-0.811199
254		H	1.85024	4.93276	-2.35953
255		H	0.834722	5.69423	-1.12356
256		C	2.52999	-0.947936	0.009969
257		C	0.482799	-2.2863	-0.06987
258		C	2.00873	-2.39736	0.193367
259		F	3.57231	-0.688681	0.854066
260		F	3.03187	-0.795427	-1.26101
261		F	2.20707	-2.79002	1.47667
262		F	2.61283	-3.27668	-0.629159
263		F	0.25947	-2.52679	-1.40136
264		F	-0.21189	-3.22161	0.62645
265		H	-0.621482	3.95396	0.262387
266		C	-2.74731	-1.74755	-0.886263
267		C	-4.61899	0.326045	-0.518502
268		H	-2.04064	-2.54978	-1.05324
269		H	-5.33362	1.13169	-0.375747
270		C	-4.01839	-1.82474	-1.45112
271		C	-4.95157	-0.796744	-1.27764
272		H	-4.28213	-2.69742	-2.04207
273		H	-5.93608	-0.868808	-1.7307
274
275	Closed-ring isomer of N4
276		C	-0.034268	-0.890441	0.297875
277		C	1.25736	-0.247541	0.299264
278		C	-1.17608	-0.162219	0.389297
279		C	1.31028	1.11459	0.106283
280		C	-3.11785	0.966583	-0.039065
281		C	1.60411	3.56248	-0.429949
282		N	0.160889	1.87133	0.174831
283		C	-1.04191	1.30106	0.802983
284		C	-1.01075	1.51101	2.32042
285		H	-0.985945	2.58002	2.55672
286		H	-1.90587	1.06815	2.76678
287		H	-0.128158	1.02686	2.74922
288		C	0.339506	3.22192	-0.114719
289		S	2.66037	2.13134	-0.369515
290		C	-2.57293	-0.33047	0.042087
291		C	2.35281	-1.24087	0.198825
292		C	0.158624	-2.3659	0.076844
293		C	1.64298	-2.50039	-0.377156
294		F	2.90889	-1.5698	1.41109
295		F	3.38614	-0.841184	-0.600836
296		F	2.20387	-3.65607	0.02899
297		F	1.69148	-2.44268	-1.73263
298		F	-0.683192	-2.90234	-0.850221
299		F	-0.017444	-3.07348	1.23242
300		C	-4.42755	1.21192	-0.415473
301		C	-3.38317	-1.42727	-0.272942
302		H	-2.98275	-2.43367	-0.235721
303		H	-4.81046	2.22555	-0.471034
304		C	-4.71108	-1.19982	-0.640411
305		C	-5.2258	0.100152	-0.712861
306		H	-5.35135	-2.04449	-0.877041
307		H	-0.523712	3.87195	-0.080196
308		C	2.14708	4.90517	-0.802667
309		H	2.93964	5.22562	-0.115466
310		H	2.56792	4.90636	-1.81552
311		H	1.34822	5.65233	-0.769028
312		H	-6.26146	0.253807	-1.0025
313		O	-2.20927	1.95712	0.276386
314
315	Transition state of N4
316		C	0.120505	-0.87438	0.364555
317		C	1.24363	-0.032877	0.318625
318		C	-1.17046	-0.417206	0.609481
319		C	1.07252	1.37119	0.193744
320		C	-3.27835	0.372994	0.256778
321		C	0.929746	3.7429	-0.571857
322		N	-0.040459	1.99543	0.58927
323		C	-1.37061	0.824792	1.33472
324		C	-0.950461	1.02256	2.76694
325		H	-1.04425	2.07211	3.05821
326		H	-1.60588	0.417949	3.40494
327		H	0.081263	0.697822	2.91317
328		C	-0.145547	3.28744	0.124769
329		S	2.11548	2.44976	-0.721915
330		C	-2.442	-0.718299	-0.026336
331		C	2.48564	-0.783789	-0.012174
332		C	0.51569	-2.25152	-0.098383
333		C	2.05928	-2.27732	0.074786
334		F	3.53061	-0.52516	0.829485
335		F	2.95172	-0.512871	-1.27724
336		F	2.35509	-2.76039	1.30718
337		F	2.67028	-3.04245	-0.85097
338		F	0.211608	-2.44625	-1.42061
339		F	-0.083355	-3.25293	0.595691
340		C	-2.93102	-1.73662	-0.853133
341		C	-4.56222	0.514656	-0.232599
342		H	-2.31012	-2.58728	-1.11072
343		H	-5.16585	1.38278	0.01095
344		C	-4.23524	-1.62964	-1.34254
345		C	-5.04137	-0.524109	-1.04167
346		H	-4.62961	-2.41988	-1.97511
347		H	-1.02506	3.86543	0.382963
348		C	1.18129	5.11483	-1.11609
349		H	1.37905	5.0924	-2.19424
350		H	0.303668	5.74644	-0.947514
351		H	2.04055	5.59462	-0.632094
352		O	-2.64339	1.28354	1.10044
353		H	-6.05097	-0.467988	-1.43782
354
355	Closed-ring isomer of I1
356		C	1.02012	-0.933744	0.338538
357		C	2.04207	0.087971	0.276555
358		C	-0.277981	-0.610901	0.507382
359		C	1.64118	1.38861	0.092706
360		C	-2.74395	-0.129206	0.223173
361		C	1.11982	3.78746	-0.477465
362		N	0.31204	1.73624	0.222742
363		C	-0.63389	0.817031	0.931508
364		C	-0.460821	1.0114	2.45802
365		H	-0.739436	2.03083	2.74982
366		H	-1.10379	0.305438	2.99211
367		H	0.577601	0.830563	2.75269
368		C	0.048279	3.06647	-0.095501
369		S	2.57747	2.77031	-0.460391
370		C	1.18465	5.22569	-0.881727
371		H	1.86301	5.79722	-0.236238
372		H	1.5361	5.34282	-1.9142
373		H	0.190819	5.67898	-0.811725
374		C	-4.18179	-0.262297	-0.072375
375		C	-5.11285	0.607001	0.522779
376		C	-4.65201	-1.24836	-0.956039
377		C	-6.46989	0.505233	0.226713
378		H	-4.76961	1.34816	1.2386
379		C	-6.01117	-1.35047	-1.24745
380		H	-3.94653	-1.92409	-1.43102
381		C	-6.92442	-0.473503	-0.66018
382		H	-7.17552	1.18291	0.699544
383		H	-6.35563	-2.11582	-1.93731
384		H	-7.98402	-0.556324	-0.885531
385		C	3.38082	-0.514711	0.077634
386		C	1.65154	-2.27307	0.07817
387		C	3.05838	-1.92796	-0.491412
388		F	4.09693	-0.669154	1.24084
389		F	4.1827	0.192705	-0.773361
390		F	3.98656	-2.8516	-0.17426
391		F	2.97183	-1.841	-1.84397
392		F	0.941286	-3.05246	-0.780655
393		F	1.80862	-2.98617	1.23359
394		C	-2.07482	0.999683	0.522389
395		S	-1.71836	-1.59753	0.22953
396		H	-2.56799	1.96414	0.580247
397		H	-0.965993	3.4322	-0.022529
398
399	Transition state of I1
400		C	1.06214	-0.919129	0.436848
401		C	2.01561	0.121934	0.379957
402		C	-0.279252	-0.695028	0.677681
403		C	1.58558	1.46017	0.245643
404		C	-2.73547	-0.247878	0.333115
405		C	0.969631	3.74764	-0.558915
406		N	0.363166	1.85911	0.629152
407		C	-0.723962	0.518264	1.3626
408		C	-0.272428	0.734083	2.80029
409		H	-0.506008	1.75031	3.13394
410		H	-0.80554	0.0241	3.44371
411		H	0.800349	0.563133	2.91509
412		C	0.002364	3.09402	0.133441
413		S	2.39872	2.72338	-0.677221
414		C	0.946773	5.13755	-1.1149
415		H	1.68142	5.78649	-0.622618
416		H	1.16601	5.14689	-2.18922
417		H	-0.043851	5.57959	-0.969576
418		C	-4.15366	-0.329889	-0.053388
419		C	-5.14294	0.286351	0.734209
420		C	-4.55265	-1.01477	-1.21454
421		C	-6.48412	0.230601	0.363755
422		H	-4.85913	0.788573	1.65411
423		C	-5.89575	-1.07213	-1.58074
424		H	-3.80351	-1.4868	-1.84384
425		C	-6.86661	-0.448145	-0.795512
426		H	-7.23388	0.708488	0.988433
427		H	-6.18269	-1.60244	-2.48451
428		H	-7.91383	-0.4949	-1.08099
429		C	3.37099	-0.414796	0.08165
430		C	1.70846	-2.22263	0.043208
431		C	3.09077	-1.81462	-0.534753
432		F	4.15099	-0.571611	1.19961
433		F	4.09116	0.363812	-0.781525
434		F	4.05483	-2.7159	-0.261813
435		F	2.98482	-1.6818	-1.88162
436		F	0.976556	-2.92557	-0.866545
437		F	1.89422	-3.03579	1.12295
438		C	-2.14054	0.728911	1.07349
439		S	-1.62247	-1.53732	-0.12604
440		H	-2.68534	1.5779	1.47318
441		H	-0.979049	3.48658	0.371957
442
443	Closed-ring isomer of I2
444		C	1.08749	-0.939853	0.337819
445		C	2.02324	0.157223	0.249059
446		C	-0.224492	-0.719518	0.552053
447		C	1.5156	1.42766	0.106715
448		C	-2.64916	-0.269638	0.260823
449		C	0.782998	3.79298	-0.373915
450		N	0.172732	1.66989	0.288886
451		C	-0.697605	0.67283	0.968456
452		C	-0.621994	0.878021	2.49517
453		H	-1.00705	1.86723	2.76315
454		H	-1.22398	0.115499	2.99844
455		H	0.414421	0.787998	2.83456
456		C	-0.215464	2.98109	0.023318
457		S	2.31663	2.89291	-0.437629
458		C	0.722988	5.24157	-0.740677
459		H	1.37486	5.84893	-0.100691
460		H	1.03009	5.41154	-1.77992
461		H	-0.300746	5.61155	-0.627602
462		C	-4.07797	-0.386185	-0.084556
463		C	-4.92332	0.717071	0.124812
464		C	-4.61336	-1.56695	-0.620957
465		C	-6.27418	0.636776	-0.197565
466		H	-4.50244	1.62415	0.544658
467		C	-5.96783	-1.6438	-0.940521
468		H	-3.97076	-2.42301	-0.805493
469		C	-6.80069	-0.543818	-0.729987
470		H	-6.92014	1.4941	-0.029892
471		H	-6.37042	-2.56221	-1.35785
472		H	-7.85657	-0.605509	-0.97879
473		C	3.39772	-0.336254	0.000961
474		C	1.8143	-2.22724	0.060934
475		C	3.16964	-1.77309	-0.555696
476		F	4.16767	-0.42826	1.13594
477		F	4.1074	0.43092	-0.879587
478		F	4.17779	-2.61918	-0.267574
479		F	3.0317	-1.69954	-1.9045
480		F	1.13862	-3.06228	-0.772102
481		F	2.06399	-2.91891	1.21215
482		S	-1.62642	-1.76256	0.331688
483		H	-1.25931	3.23368	0.143537
484		N	-2.07608	0.843322	0.533188
485
486	Transition state of I2
487		C	1.12692	-0.921225	0.420024
488		C	1.98693	0.192585	0.358393
489		C	-0.229436	-0.816456	0.674892
490		C	1.45102	1.49891	0.251499
491		C	-2.64654	-0.426798	0.351508
492		C	0.645358	3.74243	-0.49961
493		N	0.211589	1.79365	0.660424
494		C	-0.791475	0.341285	1.36525
495		C	-0.406971	0.590264	2.80999
496		H	-0.73377	1.58425	3.12612
497		H	-0.910239	-0.158866	3.43322
498		H	0.671251	0.495865	2.95543
499		C	-0.255709	3.00341	0.199092
500		S	2.14699	2.83526	-0.661695
501		C	0.503267	5.13475	-1.03155
502		H	1.19121	5.83256	-0.538746
503		H	0.703853	5.1788	-2.10862
504		H	-0.517121	5.49288	-0.86369
505		C	-4.06094	-0.466881	-0.048556
506		C	-4.92521	0.547684	0.400818
507		C	-4.57425	-1.48704	-0.866334
508		C	-6.26751	0.54017	0.035051
509		H	-4.52342	1.3277	1.03794
510		C	-5.91895	-1.49145	-1.22809
511		H	-3.92365	-2.27948	-1.226
512		C	-6.76938	-0.478394	-0.779775
513		H	-6.926	1.32873	0.388735
514		H	-6.30252	-2.28618	-1.86144
515		H	-7.81841	-0.483666	-1.06272
516		C	3.38118	-0.228253	0.048594
517		C	1.87539	-2.1686	0.025547
518		C	3.21605	-1.64932	-0.561286
519		F	4.18098	-0.312317	1.15946
520		F	4.02233	0.606409	-0.823821
521		F	4.25294	-2.46538	-0.28835
522		F	3.09332	-1.53236	-1.90793
523		F	1.19545	-2.92765	-0.879545
524		F	2.13137	-2.96327	1.10398
525		S	-1.52274	-1.70635	-0.140191
526		H	-1.26249	3.303	0.464292
527		N	-2.14912	0.522159	1.09082
528
529	Closed-ring isomer of I3
530		C	0.86863	-0.899964	0.201163
531		C	1.38188	0.44069	0.375606
532		C	0.506172	1.48398	0.197277
533		C	-0.875443	3.48434	-0.452516
534		N	-0.856225	1.25049	0.150253
535		C	-1.59621	2.36706	-0.238793
536		S	0.850884	3.16511	-0.185571
537		C	-1.35608	4.83907	-0.865621
538		H	-1.08893	5.60518	-0.127158
539		H	-0.929068	5.14654	-1.828
540		H	-2.44585	4.83429	-0.967289
541		C	2.86362	0.44494	0.335595
542		C	2.01157	-1.83072	-0.089922
543		C	3.20702	-0.883648	-0.401652
544		F	3.44908	0.414341	1.57838
545		F	3.39494	1.52343	-0.312883
546		F	4.3923	-1.40503	-0.029411
547		F	3.23543	-0.64169	-1.73757
548		F	1.7674	-2.68498	-1.1207
549		F	2.32756	-2.59453	0.998463
550		H	-2.66395	2.27268	-0.359828
551		C	-0.45941	-1.13752	0.203093
552		C	-1.38491	-0.03135	0.725818
553		C	-2.78825	-0.412992	0.27452
554		C	-2.87206	-1.69318	-0.297631
555		C	-3.97007	0.292485	0.517343
556		C	-4.09803	-2.2355	-0.687019
557		C	-5.20146	-0.236323	0.123932
558		H	-3.94302	1.24888	1.03231
559		C	-5.26061	-1.49218	-0.485091
560		H	-4.14577	-3.22389	-1.13436
561		H	-6.11251	0.326014	0.305175
562		H	-6.21861	-1.90427	-0.78948
563		S	-1.32171	-2.54847	-0.423205
564		C	-1.3243	0.058348	2.26916
565		H	-0.301546	0.250921	2.6041
566		H	-1.97434	0.86234	2.63216
567		H	-1.66237	-0.887378	2.70298
568
569	Transition state of I3
570		C	0.83546	-0.904068	0.273711
571		C	1.34895	0.399381	0.441834
572		C	-0.520628	-1.17976	0.280344
573		C	0.498952	1.5204	0.303451
574		C	-2.88944	-1.59055	-0.467749
575		C	-0.749729	3.52621	-0.513445
576		N	-0.827576	1.44517	0.493938
577		C	-1.44424	-0.291797	0.964334
578		C	-1.2674	-0.09758	2.46213
579		H	-1.84713	0.757116	2.82308
580		H	-1.61947	-1.00063	2.97472
581		H	-0.218246	0.058201	2.72108
582		C	-1.51918	2.52376	-0.016767
583		S	0.946572	3.06432	-0.420435
584		C	-1.17565	4.87017	-1.0175
585		H	-0.799399	5.68213	-0.383273
586		H	-0.813708	5.05253	-2.03628
587		H	-2.26819	4.93228	-1.03185
588		C	-4.11678	-1.97854	-1.01412
589		C	-5.27104	-1.31089	-0.613193
590		C	2.83675	0.395263	0.371222
591		C	1.95397	-1.85451	-0.067945
592		C	3.17268	-0.936504	-0.357597
593		F	3.43419	0.388228	1.60577
594		F	3.35724	1.46523	-0.301732
595		F	4.33919	-1.47867	0.043699
596		F	3.23759	-0.695238	-1.69166
597		F	1.66663	-2.65042	-1.13603
598		F	2.24876	-2.67826	0.978984
599		C	-2.81442	-0.544101	0.474679
600		S	-1.33115	-2.32789	-0.824219
601		H	-2.59922	2.53667	0.06467
602		C	-3.99212	0.097859	0.884263
603		C	-5.21392	-0.277372	0.334002
604		H	-4.16923	-2.78727	-1.73702
605		H	-6.22879	-1.60203	-1.03572
606		H	-6.12583	0.224146	0.64418
607		H	-3.95019	0.885607	1.63205
608
609	Closed-ring isomer of I4
610		C	0.753169	-0.960775	0.230803
611		C	1.28543	0.386886	0.345112
612		C	0.426393	1.43993	0.168606
613		C	-0.946066	3.48508	-0.381773
614		N	-0.945824	1.23394	0.150236
615		C	-1.67933	2.37846	-0.160144
616		S	0.786765	3.12208	-0.206843
617		C	-1.41245	4.85946	-0.741985
618		H	-1.08525	5.60313	-0.004794
619		H	-1.03001	5.1757	-1.72023
620		H	-2.50591	4.88476	-0.78427
621		C	2.76558	0.361371	0.27697
622		C	1.86468	-1.917	-0.093141
623		C	3.07006	-0.987969	-0.43977
624		F	3.37325	0.341744	1.50984
625		F	3.30437	1.41726	-0.400975
626		F	4.25292	-1.52283	-0.078546
627		F	3.08006	-0.769539	-1.78008
628		F	1.5849	-2.76009	-1.1195
629		F	2.19901	-2.68687	0.985162
630		H	-2.75538	2.30727	-0.221074
631		C	-0.573314	-1.14153	0.31049
632		C	-1.49106	-0.006414	0.762934
633		C	-2.81392	-0.524399	0.220346
634		C	-2.60603	-1.84356	-0.197837
635		C	-4.10896	-0.012172	0.221994
636		C	-3.62683	-2.66082	-0.660284
637		C	-5.15735	-0.809372	-0.251874
638		H	-4.31912	0.985929	0.596723
639		C	-4.91386	-2.11563	-0.688807
640		H	-3.42298	-3.67636	-0.98197
641		H	-6.16824	-0.413652	-0.268703
642		H	-5.73836	-2.72385	-1.0497
643		C	-1.5261	0.152807	2.30048
644		H	-0.530378	0.399633	2.68067
645		H	-2.22264	0.949565	2.58527
646		H	-1.85737	-0.781108	2.76456
647		O	-1.29283	-2.24814	-0.089303
648
649	Transition state of I4
650		C	0.707302	-0.94402	0.175581
651		C	1.25822	0.345575	0.364937
652		C	-0.641104	-1.16998	0.300942
653		C	0.424193	1.4824	0.275793
654		C	-2.64981	-1.71152	-0.427427
655		C	-0.800859	3.54197	-0.443563
656		N	-0.895017	1.44301	0.525298
657		C	-1.53864	-0.27232	1.00594
658		C	-1.39081	-0.056955	2.50065
659		H	-1.99638	0.789934	2.83772
660		H	-1.731	-0.958751	3.02327
661		H	-0.349372	0.129479	2.77216
662		C	-1.57648	2.55184	0.067685
663		S	0.883435	3.02364	-0.442306
664		C	-1.20639	4.90861	-0.900776
665		H	-0.774898	5.69504	-0.269611
666		H	-0.887262	5.10069	-1.93202
667		H	-2.29587	5.00497	-0.861797
668		C	-3.69248	-2.33512	-1.10459
669		C	-4.97839	-1.84953	-0.867245
670		C	2.73457	0.333544	0.171459
671		C	1.76314	-1.86903	-0.366003
672		C	3.09255	-1.1768	0.050713
673		F	3.4357	0.918187	1.18904
674		F	3.12734	0.988419	-0.97258
675		F	3.46945	-1.64777	1.26594
676		F	4.08812	-1.39893	-0.82995
677		F	1.71615	-1.95452	-1.72834
678		F	1.68797	-3.13157	0.124109
679		C	-2.85523	-0.639286	0.457406
680		H	-2.65064	2.59712	0.202235
681		C	-4.15563	-0.182754	0.699882
682		C	-5.21327	-0.788091	0.024303
683		H	-3.50349	-3.16082	-1.78213
684		H	-5.8186	-2.30867	-1.38062
685		H	-6.22948	-0.443812	0.19109
686		H	-4.33918	0.627712	1.40064
687		O	-1.33768	-2.06598	-0.518649

## Sheet: BMK
1	Table of Contents
2	Structure				Row
3	Closed-ring isomer of N1				21
4	Transition state of N1				65
5	Closed-ring isomer of N2				109
6	Transition state of N2				152
7	Closed-ring isomer of N3				195
8	Transition state of N3				235
9	Closed-ring isomer of N4				275
10	Transition state of N4				315
11	Closed-ring isomer of I1				355
12	Transition state of I1				399
13	Closed-ring isomer of I2				443
14	Transition state of I2				486
15	Closed-ring isomer of I3				529
16	Transition state of I3				569
17	Closed-ring isomer of I4				609
18	Transition state of I4				649
19
20	Structure	Atom	x	y	z
21	Closed-ring isomer of N1
22		C	0.811323	-0.958761	0.383993
23		C	2.02096	-0.1789	0.265001
24		C	-0.407045	-0.372928	0.517593
25		C	1.89878	1.1739	0.04052
26		C	-2.71139	0.027817	0.185205
27		C	1.8985	3.63953	-0.515548
28		N	0.680342	1.79708	0.168458
29		C	-0.417814	1.11824	0.872077
30		C	-0.285987	1.33524	2.3944
31		H	-0.339487	2.40356	2.63951
32		H	-1.09784	0.808665	2.90819
33		H	0.676255	0.930949	2.73643
34		C	0.702853	3.15719	-0.124107
35		S	3.11579	2.32162	-0.527744
36		C	2.26624	5.039	-0.921034
37		H	3.06151	5.4433	-0.28042
38		H	2.6178	5.07403	-1.96095
39		H	1.38913	5.69121	-0.833825
40		C	-4.13843	-0.196421	-0.103753
41		C	-5.10316	0.795193	0.164104
42		C	-4.56738	-1.42124	-0.659685
43		C	-6.45562	0.565765	-0.105832
44		H	-4.79529	1.74184	0.604243
45		C	-5.91875	-1.6489	-0.920584
46		H	-3.83412	-2.18565	-0.907088
47		C	-6.8702	-0.656555	-0.645321
48		H	-7.18534	1.34342	0.111509
49		H	-6.22909	-2.59886	-1.35164
50		H	-7.923	-0.834413	-0.855383
51		C	3.21062	-1.05717	0.058654
52		C	1.14806	-2.42067	0.201964
53		C	2.57592	-2.39948	-0.43171
54		F	3.9102	-1.30417	1.19207
55		F	4.09126	-0.574484	-0.842581
56		F	3.29887	-3.46823	-0.095701
57		F	2.45396	-2.35482	-1.76691
58		F	0.273933	-3.0846	-0.576731
59		F	1.20967	-3.07171	1.38289
60		H	-0.217476	3.72434	-0.034725
61		S	-2.09385	1.7259	0.289169
62		C	-1.73407	-0.905338	0.337102
63		H	-1.91813	-1.9734	0.266614
64
65	Transition state of N1
66		C	0.949877	-0.931432	0.497381
67		C	1.99849	-0.028768	0.293353
68		C	-0.362928	-0.539437	0.829314
69		C	1.73321	1.36807	0.14472
70		C	-2.67746	-0.248433	0.424641
71		C	1.31958	3.6807	-0.710552
72		N	0.653768	1.94155	0.659709
73		C	-0.544738	0.700841	1.56007
74		C	0.095926	0.922639	2.92277
75		H	0.01743	1.97276	3.22622
76		H	-0.420615	0.296769	3.66129
77		H	1.15329	0.639241	2.89445
78		C	0.388955	3.1924	0.155125
79		S	2.57625	2.45786	-0.971284
80		C	1.3902	5.04116	-1.34973
81		H	2.269	5.60173	-1.00427
82		H	1.44534	4.96408	-2.44349
83		H	0.492719	5.61515	-1.09054
84		C	-4.03038	-0.400476	-0.132842
85		C	-4.48182	-1.66926	-0.556127
86		C	-4.90489	0.697337	-0.259051
87		C	-5.75576	-1.82609	-1.10394
88		H	-3.83399	-2.53544	-0.437353
89		C	-6.18271	0.534635	-0.801696
90		H	-4.57706	1.68688	0.055594
91		C	-6.6145	-0.72555	-1.23011
92		H	-6.08317	-2.81383	-1.42338
93		H	-6.83993	1.39762	-0.892221
94		H	-7.6098	-0.851469	-1.65145
95		C	3.26201	-0.730566	-0.108986
96		C	1.40457	-2.33685	0.149065
97		C	2.77286	-2.13767	-0.572662
98		F	4.13362	-0.880291	0.913261
99		F	3.92952	-0.102475	-1.10035
100		F	3.64398	-3.10594	-0.288203
101		F	2.56732	-2.10662	-1.89696
102		F	0.535962	-2.99279	-0.645116
103		F	1.58583	-3.08766	1.25243
104		H	-0.494082	3.72013	0.505264
105		S	-2.27098	1.16749	1.46326
106		H	-1.59675	-1.9259	-0.385893
107		C	-1.58536	-1.0436	0.246032
108
109	Closed-ring isomer of N2
110		C	0.684792	-0.947999	0.354965
111		C	1.95114	-0.263168	0.255786
112		C	-0.473055	-0.257293	0.508301
113		C	1.94532	1.09732	0.045473
114		C	-2.62447	0.197967	0.176683
115		C	2.15924	3.55727	-0.492864
116		N	0.782919	1.82085	0.167433
117		C	-0.367038	1.23872	0.868959
118		C	-0.229951	1.45105	2.39098
119		H	-0.218519	2.52084	2.63528
120		H	-1.07294	0.97572	2.90478
121		H	0.70475	0.989594	2.73688
122		C	0.922919	3.1765	-0.116686
123		S	3.26092	2.142	-0.499753
124		C	2.64935	4.92266	-0.885115
125		H	3.47033	5.25237	-0.234361
126		H	3.0126	4.93368	-1.92147
127		H	1.83088	5.6474	-0.800981
128		C	-4.05053	-0.049418	-0.095005
129		C	-4.98612	0.999114	-0.151269
130		C	-4.48002	-1.37581	-0.308887
131		C	-6.33035	0.727602	-0.422433
132		H	-4.66969	2.02531	0.027304
133		C	-5.82306	-1.63959	-0.574439
134		H	-3.74544	-2.17584	-0.266554
135		C	-6.75211	-0.590039	-0.633571
136		H	-7.04705	1.54528	-0.46362
137		H	-6.14737	-2.66514	-0.739628
138		H	-7.79938	-0.799801	-0.842765
139		C	3.07495	-1.23055	0.079819
140		C	0.900785	-2.43327	0.146493
141		C	2.3539	-2.51921	-0.430976
142		F	3.7196	-1.52679	1.23337
143		F	4.01503	-0.813518	-0.793863
144		F	2.97881	-3.63901	-0.066006
145		F	2.28887	-2.4694	-1.76976
146		F	0.022464	-3.00545	-0.686001
147		F	0.862642	-3.10539	1.31512
148		H	0.051815	3.81738	-0.030846
149		N	-1.74925	-0.729058	0.328501
150		S	-1.99507	1.91772	0.257972
151
152	Transition state of N2
153		C	0.824602	-0.905617	0.524627
154		C	1.94073	-0.096035	0.305711
155		C	-0.444778	-0.387546	0.853936
156		C	1.79521	1.31413	0.10866
157		C	-2.6069	-0.059161	0.422744
158		C	1.58659	3.61751	-0.83892
159		N	0.768279	1.99819	0.594172
160		C	-0.529002	0.891436	1.54011
161		C	0.123867	1.12174	2.89474
162		H	0.144476	2.18752	3.14695
163		H	-0.451437	0.582684	3.658
164		H	1.14977	0.738629	2.88713
165		C	0.614403	3.24653	0.039798
166		S	2.73382	2.28244	-1.04145
167		C	1.77613	4.94011	-1.53122
168		H	2.69971	5.4355	-1.20359
169		H	1.82636	4.81445	-2.62067
170		H	0.931436	5.59966	-1.29992
171		C	-3.94809	-0.277485	-0.144901
172		C	-4.19275	-1.45871	-0.874975
173		C	-4.98607	0.656024	0.0229
174		C	-5.45418	-1.6939	-1.42157
175		H	-3.38203	-2.17203	-1.00013
176		C	-6.2469	0.415924	-0.531329
177		H	-4.81369	1.57178	0.586785
178		C	-6.48588	-0.758606	-1.25376
179		H	-5.63372	-2.60903	-1.98271
180		H	-7.04194	1.14645	-0.395223
181		H	-7.46838	-0.945394	-1.68289
182		C	3.15046	-0.911904	-0.049824
183		C	1.16048	-2.35735	0.219657
184		C	2.55472	-2.28734	-0.480672
185		F	3.9847	-1.09691	0.997022
186		F	3.88617	-0.370711	-1.04394
187		F	3.34181	-3.31231	-0.152737
188		F	2.37606	-2.27813	-1.80904
189		F	0.265722	-2.96773	-0.565317
190		F	1.27206	-3.07579	1.35534
191		H	-0.218567	3.86413	0.364462
192		S	-2.21963	1.44818	1.3798
193		N	-1.61166	-0.862281	0.300394
194
195	Closed-ring isomer of N3
196		C	-0.130375	-0.84429	0.21031
197		C	1.27822	-0.518281	0.268401
198		C	-1.09201	0.110155	0.273993
199		C	1.65051	0.793237	0.096008
200		C	-3.09847	1.31771	-0.219641
201		C	2.55403	3.11099	-0.339689
202		N	0.705211	1.78771	0.083297
203		C	-0.636914	1.53495	0.623781
204		C	-0.64595	1.76965	2.14952
205		H	-0.366005	2.8039	2.38573
206		H	-1.64796	1.57135	2.54584
207		H	0.068357	1.08226	2.62307
208		C	1.22245	3.06045	-0.140862
209		S	-1.90348	2.65863	-0.201029
210		S	3.25027	1.46088	-0.237944
211		C	-2.53782	0.050114	0.058718
212		C	3.42236	4.30311	-0.627575
213		H	4.20599	4.41759	0.133372
214		H	3.91107	4.21401	-1.60706
215		H	2.81073	5.21314	-0.631362
216		C	2.13146	-1.73873	0.255332
217		C	-0.26912	-2.33595	-0.033538
218		C	1.18714	-2.82335	-0.351184
219		F	2.51393	-2.14535	1.49099
220		F	3.26001	-1.60675	-0.472785
221		F	1.42037	-4.04357	0.133287
222		F	1.35396	-2.84085	-1.68089
223		F	-1.08717	-2.64151	-1.05522
224		F	-0.730346	-2.98733	1.05606
225		H	0.54346	3.90646	-0.149451
226		C	-4.45744	1.47527	-0.493041
227		C	-3.38323	-1.07214	0.094304
228		H	-2.97862	-2.04888	0.341442
229		H	-4.86965	2.45867	-0.708327
230		C	-4.74677	-0.920293	-0.172744
231		C	-5.28085	0.341712	-0.472002
232		H	-5.39836	-1.79075	-0.139483
233		H	-6.34419	0.448524	-0.676816
234
235	Transition state of N3
236		C	0.164564	-0.863787	0.335199
237		C	1.32688	-0.084913	0.290454
238		C	-1.11878	-0.329174	0.562037
239		C	1.24534	1.33468	0.13218
240		C	-3.36958	0.320399	0.07106
241		C	1.23191	3.67929	-0.726
242		N	0.197111	2.03629	0.53037
243		C	-1.19264	0.896357	1.3264
244		C	-0.599392	1.00653	2.72359
245		H	-0.560536	2.0514	3.0508
246		H	-1.23562	0.438444	3.41421
247		H	0.411507	0.587754	2.7453
248		C	0.153126	3.31216	0.021369
249		S	-2.82437	1.62885	1.16553
250		S	2.34201	2.30285	-0.862727
251		C	-2.37707	-0.671448	-0.108093
252		C	1.5479	5.01949	-1.33273
253		H	2.44797	5.46084	-0.884579
254		H	1.71258	4.93737	-2.41503
255		H	0.70862	5.70451	-1.16406
256		C	2.55317	-0.903336	0.019499
257		C	0.522012	-2.28198	-0.07462
258		C	2.05444	-2.36935	0.189643
259		F	3.57596	-0.642002	0.859246
260		F	3.03896	-0.730379	-1.23428
261		F	2.25874	-2.76725	1.45304
262		F	2.66462	-3.21654	-0.639189
263		F	0.310798	-2.49467	-1.39433
264		F	-0.151133	-3.22781	0.597018
265		H	-0.687792	3.95001	0.279422
266		C	-2.69359	-1.78376	-0.911757
267		C	-4.62495	0.24696	-0.533345
268		H	-1.96214	-2.56725	-1.07852
269		H	-5.3601	1.03521	-0.384841
270		C	-3.95806	-1.87953	-1.49793
271		C	-4.91974	-0.872515	-1.3196
272		H	-4.19429	-2.7486	-2.10864
273		H	-5.8972	-0.959404	-1.7892
274
275	Closed-ring isomer of N4
276		C	-0.017406	-0.900386	0.329855
277		C	1.26804	-0.2285	0.344969
278		C	-1.16997	-0.193481	0.402066
279		C	1.28696	1.13289	0.126963
280		C	-3.11949	0.916315	-0.035939
281		C	1.52096	3.59062	-0.433116
282		N	0.126837	1.86176	0.179465
283		C	-1.0639	1.28081	0.803833
284		C	-1.03364	1.4943	2.32675
285		H	-1.01964	2.56752	2.55545
286		H	-1.92719	1.04051	2.77112
287		H	-0.141659	1.01762	2.75042
288		C	0.266147	3.21189	-0.118604
289		S	2.62761	2.17787	-0.35663
290		C	-2.56958	-0.381649	0.046302
291		C	2.38677	-1.20593	0.204788
292		C	0.204578	-2.37629	0.089451
293		C	1.6845	-2.4622	-0.405542
294		F	2.95067	-1.56351	1.38366
295		F	3.38865	-0.77299	-0.588883
296		F	2.27137	-3.6069	-0.05463
297		F	1.69784	-2.35451	-1.74242
298		F	-0.639731	-2.91214	-0.811239
299		F	0.085684	-3.09068	1.22765
300		C	-4.4346	1.15151	-0.415625
301		C	-3.36633	-1.48849	-0.272717
302		H	-2.9517	-2.49183	-0.234679
303		H	-4.82537	2.16413	-0.472014
304		C	-4.69959	-1.271	-0.644684
305		C	-5.22406	0.029314	-0.716182
306		H	-5.33382	-2.12118	-0.885317
307		H	-0.620369	3.83538	-0.091586
308		C	2.03107	4.95075	-0.818585
309		H	2.81282	5.2932	-0.127356
310		H	2.45285	4.94704	-1.83257
311		H	1.20748	5.6741	-0.792246
312		H	-6.2618	0.175763	-1.00889
313		O	-2.22678	1.90289	0.275796
314
315	Transition state of N4
316		C	0.148091	-0.877329	0.391924
317		C	1.24296	-0.003278	0.350178
318		C	-1.16077	-0.463573	0.640465
319		C	1.02227	1.40334	0.211946
320		C	-3.28076	0.281503	0.274129
321		C	0.811392	3.76518	-0.582413
322		N	-0.099492	1.99497	0.597862
323		C	-1.40892	0.768264	1.36467
324		C	-0.96402	1.01091	2.78808
325		H	-1.08244	2.06678	3.05302
326		H	-1.59173	0.399143	3.44989
327		H	0.082152	0.716737	2.91215
328		C	-0.245082	3.27865	0.126309
329		S	2.04617	2.49973	-0.727831
330		C	-2.41766	-0.78843	-0.025168
331		C	2.51372	-0.713385	-0.005972
332		C	0.57616	-2.24667	-0.092905
333		C	2.12856	-2.22641	0.054934
334		F	3.54084	-0.450662	0.82916
335		F	2.95568	-0.410064	-1.25176
336		F	2.45743	-2.72225	1.25553
337		F	2.73686	-2.93934	-0.893753
338		F	0.257647	-2.43212	-1.39435
339		F	0.027981	-3.25779	0.597965
340		C	-2.86978	-1.80351	-0.879654
341		C	-4.5679	0.401546	-0.224906
342		H	-2.22005	-2.63228	-1.14806
343		H	-5.19531	1.25115	0.032029
344		C	-4.17574	-1.71743	-1.38069
345		C	-5.01358	-0.634903	-1.06217
346		H	-4.54579	-2.50365	-2.03545
347		H	-1.14414	3.83147	0.3828
348		C	1.01551	5.14526	-1.14603
349		H	1.20328	5.11067	-2.22716
350		H	0.115897	5.74783	-0.973129
351		H	1.86544	5.65197	-0.669864
352		O	-2.67776	1.17829	1.13126
353		H	-6.02211	-0.594916	-1.46759
354
355	Closed-ring isomer of I1
356		C	1.0234	-0.939897	0.359944
357		C	2.04937	0.089568	0.310428
358		C	-0.274228	-0.616393	0.515273
359		C	1.64058	1.38544	0.105237
360		C	-2.74505	-0.126298	0.224842
361		C	1.10804	3.7866	-0.476542
362		N	0.314688	1.72763	0.219951
363		C	-0.626597	0.821666	0.926063
364		C	-0.459542	1.02043	2.45677
365		H	-0.738882	2.0446	2.73964
366		H	-1.10698	0.31318	2.98845
367		H	0.582342	0.838712	2.7484
368		C	0.042172	3.05359	-0.098804
369		S	2.58764	2.77322	-0.449836
370		C	1.16383	5.23123	-0.887055
371		H	1.83686	5.80457	-0.235236
372		H	1.51951	5.34058	-1.92041
373		H	0.162585	5.67379	-0.821206
374		C	-4.1894	-0.260383	-0.073105
375		C	-5.11704	0.635197	0.493513
376		C	-4.6578	-1.27544	-0.928072
377		C	-6.47746	0.529419	0.195113
378		H	-4.7697	1.39813	1.18746
379		C	-6.0205	-1.38082	-1.22185
380		H	-3.95004	-1.9706	-1.37632
381		C	-6.93374	-0.478534	-0.66429
382		H	-7.18307	1.22583	0.644099
383		H	-6.36688	-2.16799	-1.88858
384		H	-7.99468	-0.564096	-0.890961
385		C	3.39494	-0.512392	0.082652
386		C	1.66188	-2.28238	0.082746
387		C	3.05901	-1.91789	-0.514191
388		F	4.11404	-0.694102	1.21709
389		F	4.17288	0.201275	-0.758292
390		F	3.98571	-2.83558	-0.235785
391		F	2.9425	-1.80286	-1.84581
392		F	0.950083	-3.05056	-0.758546
393		F	1.84976	-2.98775	1.2174
394		C	-2.07338	1.00388	0.511993
395		S	-1.72474	-1.6161	0.251851
396		H	-2.56775	1.97146	0.557059
397		H	-0.978187	3.41128	-0.032717
398
399	Transition state of I1
400		C	1.07939	-0.920955	0.463623
401		C	2.01751	0.128457	0.407928
402		C	-0.271864	-0.718031	0.713183
403		C	1.5673	1.4724	0.27074
404		C	-2.73184	-0.27128	0.349789
405		C	0.921445	3.74633	-0.557883
406		N	0.360561	1.86481	0.668016
407		C	-0.729048	0.470851	1.41599
408		C	-0.244148	0.717658	2.84165
409		H	-0.477566	1.74203	3.1556
410		H	-0.761024	0.014058	3.50821
411		H	0.834667	0.554793	2.92964
412		C	-0.022213	3.08855	0.167777
413		S	2.36872	2.72909	-0.694967
414		C	0.868512	5.13407	-1.13715
415		H	1.61	5.79403	-0.667278
416		H	1.06234	5.12215	-2.21778
417		H	-0.126837	5.56346	-0.971873
418		C	-4.15335	-0.347769	-0.052331
419		C	-5.1514	0.233122	0.755027
420		C	-4.53522	-0.993109	-1.24415
421		C	-6.4935	0.181141	0.371668
422		H	-4.87418	0.702399	1.69665
423		C	-5.87928	-1.04626	-1.62316
424		H	-3.77434	-1.43741	-1.88358
425		C	-6.86259	-0.45778	-0.818984
426		H	-7.25281	0.6298	1.0094
427		H	-6.15662	-1.54506	-2.54969
428		H	-7.9091	-0.501551	-1.11422
429		C	3.38378	-0.391049	0.073928
430		C	1.73388	-2.2241	0.047821
431		C	3.10345	-1.79165	-0.556231
432		F	4.17577	-0.551995	1.15909
433		F	4.0633	0.394352	-0.788911
434		F	4.07268	-2.67381	-0.309721
435		F	2.97	-1.64627	-1.88272
436		F	0.998837	-2.91248	-0.845412
437		F	1.94877	-3.0322	1.1036
438		C	-2.15075	0.679414	1.13677
439		S	-1.60323	-1.54253	-0.157426
440		H	-2.70478	1.51151	1.5652
441		H	-1.00597	3.47281	0.422556
442
443	Closed-ring isomer of I2
444		C	1.09403	-0.946404	0.360832
445		C	2.03153	0.160401	0.283977
446		C	-0.218418	-0.727893	0.560393
447		C	1.51325	1.42504	0.119807
448		C	-2.64649	-0.267538	0.261986
449		C	0.764692	3.79086	-0.371823
450		N	0.172666	1.65998	0.284599
451		C	-0.69388	0.674071	0.962247
452		C	-0.623706	0.884496	2.49277
453		H	-1.00797	1.87905	2.75127
454		H	-1.23038	0.121281	2.9944
455		H	0.416361	0.792804	2.8286
456		C	-0.226288	2.96538	0.018652
457		S	2.32229	2.899	-0.424064
458		C	0.69318	5.24515	-0.74439
459		H	1.33802	5.85485	-0.097141
460		H	1.00598	5.40831	-1.78452
461		H	-0.338018	5.60203	-0.636682
462		C	-4.0831	-0.384977	-0.087
463		C	-4.92711	0.722671	0.118356
464		C	-4.61246	-1.57292	-0.618554
465		C	-6.2816	0.638588	-0.205776
466		H	-4.50406	1.63285	0.535177
467		C	-5.97072	-1.65241	-0.940766
468		H	-3.96523	-2.42986	-0.796081
469		C	-6.80656	-0.548979	-0.735126
470		H	-6.93018	1.49696	-0.042424
471		H	-6.37265	-2.57464	-1.3549
472		H	-7.86388	-0.613122	-0.985195
473		C	3.41169	-0.330316	0.005202
474		C	1.82882	-2.23541	0.067743
475		C	3.16847	-1.76014	-0.580473
476		F	4.1867	-0.451674	1.11068
477		F	4.09629	0.44341	-0.863171
478		F	4.17579	-2.59924	-0.337917
479		F	2.99279	-1.65806	-1.90657
480		F	1.15031	-3.06238	-0.743796
481		F	2.11297	-2.91457	1.19782
482		S	-1.62964	-1.78408	0.354001
483		H	-1.2766	3.20625	0.131401
484		N	-2.06972	0.838456	0.52331
485
486	Transition state of I2
487		C	1.14494	-0.92214	0.444493
488		C	1.98793	0.200452	0.392701
489		C	-0.221	-0.841247	0.699479
490		C	1.4298	1.50938	0.277409
491		C	-2.63996	-0.446165	0.360873
492		C	0.59056	3.73117	-0.512009
493		N	0.202033	1.79551	0.689696
494		C	-0.795524	0.293035	1.4052
495		C	-0.383576	0.571788	2.84098
496		H	-0.710564	1.57339	3.13837
497		H	-0.87395	-0.170975	3.48498
498		H	0.700559	0.484593	2.96161
499		C	-0.287957	2.98871	0.216232
500		S	2.11489	2.83823	-0.678711
501		C	0.416006	5.1158	-1.07471
502		H	1.10327	5.83101	-0.603371
503		H	0.599691	5.13212	-2.15705
504		H	-0.610516	5.45697	-0.89543
505		C	-4.06125	-0.48256	-0.046682
506		C	-4.94506	0.478978	0.480354
507		C	-4.54712	-1.45063	-0.94405
508		C	-6.29087	0.469629	0.110862
509		H	-4.55729	1.21637	1.17802
510		C	-5.89537	-1.45628	-1.30951
511		H	-3.87482	-2.19764	-1.36304
512		C	-6.76995	-0.496979	-0.783951
513		H	-6.96841	1.21453	0.523586
514		H	-6.26142	-2.20863	-2.00499
515		H	-7.82023	-0.503644	-1.06928
516		C	3.39488	-0.199416	0.058156
517		C	1.90648	-2.16532	0.027851
518		C	3.23508	-1.61786	-0.574534
519		F	4.1966	-0.29275	1.14329
520		F	4.00237	0.643926	-0.802922
521		F	4.27462	-2.41511	-0.327644
522		F	3.09065	-1.48227	-1.90068
523		F	1.22937	-2.90767	-0.868265
524		F	2.18622	-2.95691	1.08038
525		S	-1.50293	-1.70985	-0.184494
526		H	-1.2988	3.27724	0.489689
527		N	-2.15141	0.469553	1.13829
528
529	Closed-ring isomer of I3
530		C	0.873271	-0.910245	0.233476
531		C	1.38435	0.438062	0.423882
532		C	0.504341	1.47523	0.220329
533		C	-0.888264	3.46748	-0.459484
534		N	-0.850498	1.23853	0.160267
535		C	-1.59708	2.34182	-0.243978
536		S	0.853961	3.16554	-0.16948
537		C	-1.37918	4.82004	-0.894089
538		H	-1.12609	5.59175	-0.154408
539		H	-0.938976	5.11614	-1.8557
540		H	-2.46959	4.79865	-1.00851
541		C	2.87442	0.452354	0.345611
542		C	2.02565	-1.83526	-0.083216
543		C	3.20135	-0.866617	-0.428679
544		F	3.48712	0.398335	1.55296
545		F	3.37263	1.52981	-0.295559
546		F	4.39153	-1.37576	-0.108751
547		F	3.17474	-0.608493	-1.74497
548		F	1.76873	-2.68148	-1.09531
549		F	2.37859	-2.57762	0.986671
550		H	-2.66418	2.2303	-0.380206
551		C	-0.453042	-1.14702	0.220145
552		C	-1.37974	-0.029803	0.732661
553		C	-2.78487	-0.411789	0.273995
554		C	-2.87382	-1.69304	-0.299691
555		C	-3.96591	0.301741	0.518666
556		C	-4.10368	-2.23121	-0.694363
557		C	-5.2023	-0.221832	0.120763
558		H	-3.9305	1.25895	1.03667
559		C	-5.26628	-1.47955	-0.493524
560		H	-4.1534	-3.22093	-1.1432
561		H	-6.11266	0.345018	0.302254
562		H	-6.22723	-1.88691	-0.801356
563		S	-1.31735	-2.57062	-0.416333
564		C	-1.33406	0.059988	2.28073
565		H	-0.311154	0.25376	2.62229
566		H	-1.99038	0.868179	2.63031
567		H	-1.67917	-0.888726	2.70818
568
569	Transition state of I3
570		C	0.84814	-0.906055	0.298506
571		C	1.34386	0.398817	0.471898
572		C	-0.512121	-1.2039	0.302303
573		C	0.475641	1.52136	0.327855
574		C	-2.87881	-1.59284	-0.490051
575		C	-0.790043	3.5087	-0.517988
576		N	-0.836507	1.44429	0.528865
577		C	-1.44005	-0.344715	0.998259
578		C	-1.25475	-0.114826	2.49353
579		H	-1.83458	0.751705	2.83113
580		H	-1.60504	-1.00907	3.02656
581		H	-0.200533	0.049497	2.7367
582		C	-1.54271	2.50627	0.011505
583		S	0.922964	3.0606	-0.436339
584		C	-1.23752	4.84269	-1.0513
585		H	-0.854875	5.66943	-0.438032
586		H	-0.889925	4.99591	-2.08141
587		H	-2.33295	4.89067	-1.04791
588		C	-4.10764	-1.9591	-1.05832
589		C	-5.26537	-1.30664	-0.629922
590		C	2.84206	0.417586	0.379016
591		C	1.97831	-1.85047	-0.06204
592		C	3.18345	-0.910705	-0.36683
593		F	3.44928	0.409117	1.58753
594		F	3.32802	1.48216	-0.29332
595		F	4.34913	-1.43321	0.015177
596		F	3.22357	-0.663515	-1.68401
597		F	1.68447	-2.62906	-1.11971
598		F	2.29514	-2.66321	0.963971
599		C	-2.80942	-0.588642	0.50034
600		S	-1.30512	-2.31299	-0.877401
601		H	-2.62524	2.50655	0.104542
602		C	-3.98876	0.041696	0.935226
603		C	-5.2115	-0.310458	0.363858
604		H	-4.1567	-2.73684	-1.81735
605		H	-6.22381	-1.57953	-1.06755
606		H	-6.12632	0.178168	0.691773
607		H	-3.94315	0.798646	1.71743
608
609	Closed-ring isomer of I4
610		C	0.754382	-0.97411	0.253937
611		C	1.283	0.383605	0.385322
612		C	0.422933	1.43213	0.18288
613		C	-0.96396	3.47168	-0.388665
614		N	-0.941999	1.22296	0.149967
615		C	-1.68453	2.35542	-0.168074
616		S	0.787724	3.12438	-0.198299
617		C	-1.4421	4.84626	-0.763295
618		H	-1.12477	5.59321	-0.022996
619		H	-1.05037	5.15346	-1.74235
620		H	-2.53754	4.85666	-0.814173
621		C	2.77162	0.367119	0.29346
622		C	1.87732	-1.92271	-0.092302
623		C	3.06584	-0.97111	-0.459339
624		F	3.3928	0.320271	1.49728
625		F	3.28438	1.42414	-0.369246
626		F	4.24989	-1.49587	-0.141068
627		F	3.0332	-0.733149	-1.77936
628		F	1.59469	-2.75224	-1.1083
629		F	2.24099	-2.67991	0.963467
630		H	-2.76192	2.26796	-0.239266
631		C	-0.573547	-1.15275	0.313952
632		C	-1.48506	-0.002617	0.764156
633		C	-2.81077	-0.522808	0.22187
634		C	-2.59466	-1.84516	-0.194815
635		C	-4.10934	-0.012081	0.225741
636		C	-3.61534	-2.66826	-0.658121
637		C	-5.15816	-0.815823	-0.248719
638		H	-4.31913	0.98805	0.601807
639		C	-4.90779	-2.1249	-0.686457
640		H	-3.4061	-3.68507	-0.979218
641		H	-6.17234	-0.423853	-0.265555
642		H	-5.73123	-2.73768	-1.04744
643		C	-1.51937	0.158847	2.30529
644		H	-0.517991	0.403183	2.67965
645		H	-2.21427	0.963617	2.58108
646		H	-1.85722	-0.775092	2.76955
647		O	-1.29285	-2.2401	-0.085492
648
649	Transition state of I4
650		C	0.705015	-0.949385	0.183048
651		C	1.25112	0.335962	0.392007
652		C	-0.652436	-1.1794	0.299012
653		C	0.413616	1.48391	0.300509
654		C	-2.64267	-1.6966	-0.447684
655		C	-0.80386	3.54038	-0.452162
656		N	-0.892079	1.45786	0.55707
657		C	-1.54024	-0.301517	1.03018
658		C	-1.37442	-0.062789	2.52267
659		H	-1.97286	0.797439	2.84466
660		H	-1.71759	-0.956628	3.06074
661		H	-0.325891	0.123034	2.77634
662		C	-1.5743	2.55815	0.088229
663		S	0.892453	3.01527	-0.457559
664		C	-1.2148	4.90376	-0.937903
665		H	-0.771148	5.69935	-0.324529
666		H	-0.904729	5.06534	-1.97867
667		H	-2.30606	4.99814	-0.886322
668		C	-3.68495	-2.3035	-1.15114
669		C	-4.97596	-1.83518	-0.891018
670		C	2.73691	0.336405	0.187307
671		C	1.76657	-1.87223	-0.377197
672		C	3.0996	-1.17672	0.042686
673		F	3.43089	0.894903	1.20131
674		F	3.11265	0.999268	-0.934715
675		F	3.48283	-1.65637	1.23422
676		F	4.07602	-1.37678	-0.843206
677		F	1.71444	-1.94139	-1.72256
678		F	1.70007	-3.12352	0.099821
679		C	-2.85939	-0.659372	0.480887
680		H	-2.65047	2.60486	0.230503
681		C	-4.16527	-0.218292	0.744774
682		C	-5.22055	-0.807267	0.045513
683		H	-3.48902	-3.10121	-1.86258
684		H	-5.81506	-2.28083	-1.42178
685		H	-6.24154	-0.478933	0.225929
686		H	-4.35006	0.564674	1.47905
687		O	-1.34078	-2.02845	-0.549243

## Sheet: CAMB3LYP
1	Table of Contents
2	Structure				Row
3	Closed-ring isomer of N1				21
4	Transition state of N1				65
5	Closed-ring isomer of N2				109
6	Transition state of N2				152
7	Closed-ring isomer of N3				195
8	Transition state of N3				235
9	Closed-ring isomer of N4				275
10	Transition state of N4				315
11	Closed-ring isomer of I1				355
12	Transition state of I1				399
13	Closed-ring isomer of I2				443
14	Transition state of I2				486
15	Closed-ring isomer of I3				529
16	Transition state of I3				569
17	Closed-ring isomer of I4				609
18	Transition state of I4				649
19
20	Structure	Atom	x	y	z
21	Closed-ring isomer of N1
22		C	0.801407	-0.950005	0.377464
23		C	2.0061	-0.176179	0.258289
24		C	-0.407124	-0.368552	0.516341
25		C	1.88855	1.16644	0.03337
26		C	-2.69471	0.036066	0.183776
27		C	1.90537	3.60878	-0.525358
28		N	0.670329	1.7897	0.156244
29		C	-0.425715	1.11354	0.867738
30		C	-0.282085	1.32892	2.37693
31		H	-0.337908	2.39233	2.62715
32		H	-1.08328	0.802249	2.89998
33		H	0.679554	0.931106	2.7155
34		C	0.708152	3.15049	-0.141325
35		S	3.09284	2.29971	-0.526901
36		C	2.28585	4.99351	-0.930695
37		H	3.07947	5.39486	-0.29195
38		H	2.64354	5.02627	-1.965
39		H	1.42053	5.65631	-0.85234
40		C	-4.11609	-0.186795	-0.105467
41		C	-5.08384	0.766449	0.229087
42		C	-4.53268	-1.37155	-0.726547
43		C	-6.4273	0.537849	-0.038702
44		H	-4.78428	1.68647	0.720891
45		C	-5.87499	-1.60033	-0.986482
46		H	-3.79411	-2.10757	-1.02582
47		C	-6.82902	-0.646457	-0.644015
48		H	-7.16297	1.28859	0.23239
49		H	-6.1773	-2.52381	-1.47034
50		H	-7.87896	-0.82465	-0.853656
51		C	3.18289	-1.05137	0.065886
52		C	1.13653	-2.39965	0.195865
53		C	2.55889	-2.38469	-0.414001
54		F	3.88062	-1.2929	1.21212
55		F	4.07688	-0.571364	-0.83652
56		F	3.28014	-3.45718	-0.060211
57		F	2.45119	-2.35049	-1.7591
58		F	0.265613	-3.06664	-0.59707
59		F	1.18215	-3.05501	1.38441
60		H	-0.202102	3.72811	-0.060192
61		S	-2.08165	1.70654	0.296623
62		C	-1.73087	-0.89588	0.334399
63		H	-1.91871	-1.9596	0.26202
64
65	Transition state of N1
66		C	0.928749	-0.929601	0.4813
67		C	1.98513	-0.042922	0.29381
68		C	-0.367949	-0.528412	0.808211
69		C	1.73444	1.34551	0.142603
70		C	-2.6651	-0.219501	0.415543
71		C	1.37456	3.65106	-0.69069
72		N	0.649848	1.92282	0.643108
73		C	-0.543321	0.712374	1.52801
74		C	0.08281	0.916999	2.88808
75		H	0.012333	1.96085	3.20316
76		H	-0.441775	0.293425	3.61754
77		H	1.13441	0.625728	2.87208
78		C	0.418132	3.18257	0.140879
79		S	2.59626	2.42395	-0.926159
80		C	1.482	5.00227	-1.31902
81		H	2.3609	5.54692	-0.959434
82		H	1.5561	4.93348	-2.40883
83		H	0.595874	5.59432	-1.07764
84		C	-4.01696	-0.36916	-0.129252
85		C	-4.49914	-1.63918	-0.472654
86		C	-4.8574	0.732782	-0.322424
87		C	-5.76825	-1.7958	-1.00871
88		H	-3.87623	-2.51088	-0.300594
89		C	-6.1311	0.572379	-0.851765
90		H	-4.50561	1.72863	-0.070166
91		C	-6.59239	-0.691063	-1.201
92		H	-6.12062	-2.78957	-1.26757
93		H	-6.76426	1.4426	-0.995319
94		H	-7.58821	-0.816102	-1.61414
95		C	3.23064	-0.753738	-0.094169
96		C	1.36871	-2.32432	0.125727
97		C	2.73623	-2.13863	-0.568282
98		F	4.09544	-0.922646	0.942605
99		F	3.92565	-0.124292	-1.0783
100		F	3.59568	-3.12548	-0.279732
101		F	2.54742	-2.09531	-1.90322
102		F	0.499257	-2.96946	-0.689315
103		F	1.52668	-3.09006	1.23224
104		H	-0.459471	3.72377	0.472031
105		S	-2.24555	1.18276	1.42306
106		H	-1.61688	-1.91115	-0.379129
107		C	-1.59278	-1.02426	0.24003
108
109	Closed-ring isomer of N2
110		C	0.679965	-0.938962	0.3574
111		C	1.94186	-0.259959	0.25492
112		C	-0.468017	-0.254859	0.517051
113		C	1.93761	1.08926	0.04281
114		C	-2.60939	0.205176	0.181981
115		C	2.16162	3.52609	-0.497736
116		N	0.773728	1.81138	0.160384
117		C	-0.372781	1.23101	0.8704
118		C	-0.228165	1.44881	2.3788
119		H	-0.22189	2.51516	2.62278
120		H	-1.06053	0.973538	2.90265
121		H	0.706736	0.997522	2.7249
122		C	0.926921	3.16712	-0.12756
123		S	3.23746	2.12402	-0.494681
124		C	2.65944	4.87652	-0.891753
125		H	3.47891	5.20596	-0.244635
126		H	3.02672	4.88465	-1.92314
127		H	1.85211	5.60907	-0.815457
128		C	-4.02832	-0.039799	-0.094311
129		C	-4.9629	0.99728	-0.133636
130		C	-4.4509	-1.35381	-0.328934
131		C	-6.29736	0.727385	-0.406991
132		H	-4.65317	2.01955	0.060878
133		C	-5.78398	-1.61824	-0.597293
134		H	-3.71509	-2.14918	-0.299618
135		C	-6.71074	-0.579226	-0.638443
136		H	-7.01589	1.54027	-0.434496
137		H	-6.1033	-2.63951	-0.77913
138		H	-7.75442	-0.789361	-0.850629
139		C	3.05013	-1.22402	0.080052
140		C	0.893564	-2.41045	0.144178
141		C	2.33399	-2.49948	-0.424333
142		F	3.70025	-1.52397	1.24
143		F	3.99833	-0.806754	-0.797989
144		F	2.95894	-3.62693	-0.058882
145		F	2.26976	-2.44818	-1.77163
146		F	0.009543	-2.98278	-0.694285
147		F	0.851797	-3.08954	1.31848
148		H	0.065927	3.81653	-0.049604
149		N	-1.74767	-0.729822	0.338552
150		S	-1.98253	1.88906	0.26669
151
152	Transition state of N2
153		C	0.80713	-0.899818	0.51514
154		C	1.93035	-0.107513	0.310384
155		C	-0.445019	-0.373664	0.835414
156		C	1.79831	1.29164	0.105411
157		C	-2.5975	-0.029671	0.413465
158		C	1.64295	3.58095	-0.829785
159		N	0.765477	1.98174	0.571931
160		C	-0.525034	0.906316	1.50195
161		C	0.1064	1.13014	2.85585
162		H	0.131317	2.19119	3.11374
163		H	-0.477865	0.596779	3.61119
164		H	1.1266	0.742687	2.86677
165		C	0.645393	3.23374	0.01302
166		S	2.75564	2.24522	-0.999405
167		C	1.86957	4.88899	-1.51524
168		H	2.7903	5.37124	-1.17175
169		H	1.94315	4.76571	-2.60023
170		H	1.03652	5.56503	-1.30801
171		C	-3.93752	-0.245893	-0.139945
172		C	-4.19045	-1.42422	-0.852204
173		C	-4.9662	0.684271	0.023243
174		C	-5.44724	-1.66079	-1.38552
175		H	-3.38493	-2.13911	-0.975512
176		C	-6.22325	0.444356	-0.516366
177		H	-4.791	1.60298	0.575724
178		C	-6.4683	-0.728033	-1.22113
179		H	-5.63233	-2.57822	-1.93547
180		H	-7.01371	1.17608	-0.382407
181		H	-7.45151	-0.915774	-1.64106
182		C	3.11975	-0.931593	-0.031049
183		C	1.12497	-2.33961	0.201405
184		C	2.5211	-2.2884	-0.463939
185		F	3.95076	-1.12758	1.02775
186		F	3.87756	-0.395094	-1.02384
187		F	3.29226	-3.32822	-0.117052
188		F	2.36818	-2.28112	-1.80386
189		F	0.230536	-2.93127	-0.610958
190		F	1.20186	-3.07524	1.33854
191		H	-0.181704	3.86444	0.314325
192		S	-2.19279	1.46097	1.3275
193		N	-1.62021	-0.85067	0.294828
194
195	Closed-ring isomer of N3
196		C	-0.12825	-0.836619	0.208699
197		C	1.27225	-0.508022	0.266665
198		C	-1.08844	0.105704	0.278351
199		C	1.63908	0.794591	0.091898
200		C	-3.08364	1.30412	-0.210773
201		C	2.53705	3.08937	-0.350447
202		N	0.689951	1.78367	0.077123
203		C	-0.647071	1.52443	0.631514
204		C	-0.634779	1.74126	2.14763
205		H	-0.361631	2.77125	2.39404
206		H	-1.62517	1.53369	2.55883
207		H	0.086618	1.05932	2.60895
208		C	1.21381	3.05466	-0.153413
209		S	-1.90811	2.62888	-0.162393
210		S	3.21658	1.46145	-0.242763
211		C	-2.52825	0.043338	0.05628
212		C	3.40461	4.26794	-0.641685
213		H	4.18812	4.38556	0.114047
214		H	3.89439	4.17633	-1.61659
215		H	2.80345	5.18046	-0.650954
216		C	2.11864	-1.71668	0.255802
217		C	-0.255799	-2.31612	-0.037297
218		C	1.18924	-2.79756	-0.341564
219		F	2.50665	-2.12174	1.49995
220		F	3.25526	-1.58121	-0.475115
221		F	1.42473	-4.02106	0.151963
222		F	1.36352	-2.8219	-1.67856
223		F	-1.07217	-2.62668	-1.06917
224		F	-0.725805	-2.97278	1.05573
225		H	0.542787	3.9023	-0.168623
226		C	-4.43269	1.46053	-0.489994
227		C	-3.36763	-1.07194	0.074636
228		H	-2.96833	-2.04946	0.31262
229		H	-4.84481	2.44286	-0.69666
230		C	-4.72032	-0.92036	-0.198688
231		C	-5.24978	0.335072	-0.487257
232		H	-5.36949	-1.78957	-0.179682
233		H	-6.30888	0.442289	-0.698727
234
235	Transition state of N3
236		C	0.153586	-0.858369	0.328549
237		C	1.31908	-0.096938	0.289691
238		C	-1.11357	-0.314149	0.549146
239		C	1.25029	1.31225	0.123536
240		C	-3.34453	0.355357	0.073
241		C	1.27828	3.63918	-0.716605
242		N	0.202292	2.01913	0.512957
243		C	-1.17652	0.911454	1.3035
244		C	-0.594811	1.00884	2.69473
245		H	-0.550114	2.04691	3.03186
246		H	-1.23537	0.444755	3.37887
247		H	0.409441	0.584885	2.7274
248		C	0.187022	3.2975	0.005599
249		S	-2.78224	1.64439	1.14201
250		S	2.34934	2.26344	-0.836748
251		C	-2.37512	-0.644603	-0.107622
252		C	1.62143	4.96362	-1.31667
253		H	2.52172	5.39171	-0.864444
254		H	1.79568	4.88352	-2.39419
255		H	0.798377	5.66489	-1.15922
256		C	2.52405	-0.922211	0.027371
257		C	0.497139	-2.26854	-0.073621
258		C	2.01577	-2.37082	0.179936
259		F	3.55262	-0.676391	0.878339
260		F	3.0265	-0.743284	-1.22978
261		F	2.22083	-2.78791	1.44564
262		F	2.61849	-3.21954	-0.663749
263		F	0.273331	-2.48451	-1.39946
264		F	-0.184227	-3.21208	0.607844
265		H	-0.64314	3.94829	0.250194
266		C	-2.71184	-1.74727	-0.899724
267		C	-4.59758	0.295314	-0.517224
268		H	-1.99612	-2.53954	-1.07212
269		H	-5.31976	1.09157	-0.366828
270		C	-3.97308	-1.82706	-1.47287
271		C	-4.91305	-0.813843	-1.29163
272		H	-4.22506	-2.6922	-2.07794
273		H	-5.89253	-0.888871	-1.7525
274
275	Closed-ring isomer of N4
276		C	-0.043874	-0.884022	0.318113
277		C	1.25422	-0.25564	0.331668
278		C	-1.16878	-0.150828	0.400175
279		C	1.3158	1.09492	0.119409
280		C	-3.09307	0.985415	-0.044236
281		C	1.63285	3.52257	-0.429716
282		N	0.176996	1.85563	0.172471
283		C	-1.02584	1.30866	0.799006
284		C	-0.997751	1.52783	2.30722
285		H	-0.963817	2.59736	2.53363
286		H	-1.89743	1.09739	2.75372
287		H	-0.121339	1.03905	2.74043
288		C	0.369515	3.20194	-0.123388
289		S	2.66994	2.09117	-0.352273
290		C	-2.56853	-0.309462	0.049896
291		C	2.3321	-1.25922	0.206438
292		C	0.137104	-2.35376	0.078329
293		C	1.60627	-2.48822	-0.391711
294		F	2.88331	-1.62575	1.39867
295		F	3.35885	-0.858184	-0.586943
296		F	2.1556	-3.65314	-0.022072
297		F	1.63868	-2.39342	-1.73763
298		F	-0.714386	-2.86962	-0.838864
299		F	-0.022318	-3.06717	1.22177
300		C	-4.39489	1.24014	-0.423591
301		C	-3.38151	-1.39671	-0.255112
302		H	-2.9888	-2.40515	-0.20894
303		H	-4.76621	2.2564	-0.488699
304		C	-4.70165	-1.16109	-0.626978
305		C	-5.19954	0.138312	-0.71169
306		H	-5.34931	-2.00009	-0.858456
307		H	-0.488189	3.85882	-0.100373
308		C	2.19046	4.85352	-0.810104
309		H	2.98049	5.16943	-0.120949
310		H	2.61584	4.83912	-1.81887
311		H	1.4004	5.60814	-0.787927
312		H	-6.23177	0.299342	-1.00588
313		O	-2.17783	1.96395	0.26434
314
315	Transition state of N4
316		C	0.124903	-0.868583	0.380418
317		C	1.23538	-0.028179	0.344386
318		C	-1.16514	-0.426604	0.628685
319		C	1.05284	1.37465	0.20347
320		C	-3.267	0.349213	0.267343
321		C	0.912022	3.7204	-0.57988
322		N	-0.054198	1.98992	0.591232
323		C	-1.37782	0.798624	1.35409
324		C	-0.936236	1.02095	2.7692
325		H	-1.03002	2.07359	3.04254
326		H	-1.57808	0.42422	3.42536
327		H	0.098137	0.702928	2.90154
328		C	-0.158152	3.27743	0.117628
329		S	2.08722	2.43354	-0.71689
330		C	-2.42737	-0.726521	-0.02526
331		C	2.47743	-0.76582	0.004001
332		C	0.522899	-2.23536	-0.098463
333		C	2.05934	-2.25443	0.056693
334		F	3.51132	-0.527601	0.851401
335		F	2.94325	-0.467939	-1.245
336		F	2.36925	-2.7653	1.26507
337		F	2.65838	-2.98498	-0.89415
338		F	0.207722	-2.4113	-1.41086
339		F	-0.059123	-3.24014	0.588186
340		C	-2.8996	-1.73104	-0.866659
341		C	-4.54509	0.48879	-0.22436
342		H	-2.27006	-2.5718	-1.13299
343		H	-5.15524	1.34794	0.030129
344		C	-4.19618	-1.62579	-1.36166
345		C	-5.00897	-0.535272	-1.04967
346		H	-4.58036	-2.40731	-2.00934
347		H	-1.03772	3.85721	0.368219
348		C	1.15908	5.08067	-1.146
349		H	1.34621	5.0402	-2.22363
350		H	0.284784	5.71463	-0.97919
351		H	2.02161	5.56417	-0.676265
352		O	-2.64395	1.24563	1.12523
353		H	-6.01499	-0.48045	-1.45225
354
355	Closed-ring isomer of I1
356		C	1.01234	-0.931019	0.356606
357		C	2.03614	0.087581	0.301671
358		C	-0.276556	-0.608493	0.51616
359		C	1.63631	1.37703	0.099479
360		C	-2.72604	-0.128777	0.227799
361		C	1.12483	3.76151	-0.476092
362		N	0.312243	1.72131	0.217146
363		C	-0.627134	0.817625	0.927752
364		C	-0.458758	1.01693	2.44483
365		H	-0.736373	2.03681	2.73077
366		H	-1.10203	0.314722	2.98104
367		H	0.578335	0.836929	2.74041
368		C	0.053435	3.05144	-0.101995
369		S	2.57203	2.7482	-0.448472
370		C	1.1957	5.19468	-0.885809
371		H	1.87057	5.76435	-0.238388
372		H	1.55378	5.30302	-1.91485
373		H	0.204155	5.65038	-0.824713
374		C	-4.16307	-0.258792	-0.072407
375		C	-5.0899	0.592242	0.537588
376		C	-4.62442	-1.22269	-0.973271
377		C	-6.44155	0.494413	0.238885
378		H	-4.74736	1.31898	1.26709
379		C	-5.97781	-1.32106	-1.26845
380		H	-3.91635	-1.88745	-1.45787
381		C	-6.88983	-0.462193	-0.666001
382		H	-7.14901	1.15983	0.7237
383		H	-6.31964	-2.07141	-1.97421
384		H	-7.94778	-0.542209	-0.895061
385		C	3.36595	-0.51856	0.080973
386		C	1.64129	-2.26381	0.081168
387		C	3.03021	-1.91264	-0.503042
388		F	4.08792	-0.698191	1.22435
389		F	4.15484	0.192651	-0.765683
390		F	3.95567	-2.8385	-0.216556
391		F	2.91879	-1.80166	-1.84386
392		F	0.924699	-3.03387	-0.767063
393		F	1.82017	-2.97459	1.22369
394		C	-2.06462	0.997096	0.517318
395		S	-1.71292	-1.59206	0.250012
396		H	-2.55795	1.96124	0.561641
397		H	-0.959759	3.41969	-0.037077
398
399	Transition state of I1
400		C	1.059	-0.91625	0.447661
401		C	2.00302	0.11773	0.404343
402		C	-0.281418	-0.702642	0.687237
403		C	1.56967	1.45661	0.263795
404		C	-2.71867	-0.25923	0.342245
405		C	0.969043	3.72423	-0.547772
406		N	0.362342	1.85507	0.652553
407		C	-0.726297	0.480477	1.39115
408		C	-0.251024	0.709151	2.81019
409		H	-0.47431	1.7284	3.13587
410		H	-0.775066	0.008401	3.46851
411		H	0.821652	0.534996	2.90664
412		C	0.006737	3.0886	0.15381
413		S	2.37857	2.69589	-0.668336
414		C	0.947103	5.10266	-1.12329
415		H	1.6923	5.75075	-0.650701
416		H	1.1502	5.09253	-2.19883
417		H	-0.036923	5.5528	-0.970305
418		C	-4.13527	-0.331118	-0.053433
419		C	-5.12676	0.203821	0.775562
420		C	-4.51686	-0.924639	-1.26057
421		C	-6.46191	0.158287	0.40031
422		H	-4.84867	0.636507	1.73091
423		C	-5.85351	-0.97201	-1.63268
424		H	-3.75897	-1.33573	-1.91999
425		C	-6.83011	-0.429094	-0.805525
426		H	-7.21916	0.573849	1.05775
427		H	-6.13164	-1.43245	-2.57538
428		H	-7.87507	-0.468113	-1.09652
429		C	3.35318	-0.410458	0.085037
430		C	1.70126	-2.21026	0.031583
431		C	3.07244	-1.79522	-0.542524
432		F	4.14234	-0.57849	1.18225
433		F	4.05247	0.376003	-0.775505
434		F	4.03251	-2.69313	-0.28086
435		F	2.96117	-1.64719	-1.87912
436		F	0.966963	-2.88754	-0.88292
437		F	1.89055	-3.03474	1.08977
438		C	-2.13995	0.692748	1.11262
439		S	-1.60813	-1.51826	-0.150779
440		H	-2.68983	1.527	1.53347
441		H	-0.969962	3.48895	0.395567
442
443	Closed-ring isomer of I2
444		C	1.08071	-0.9373	0.355728
445		C	2.01875	0.156563	0.27675
446		C	-0.222572	-0.716493	0.559539
447		C	1.51204	1.41671	0.116315
448		C	-2.63146	-0.26952	0.265375
449		C	0.787674	3.76692	-0.375133
450		N	0.17426	1.6556	0.286043
451		C	-0.690213	0.672166	0.967408
452		C	-0.615281	0.879938	2.48462
453		H	-0.99782	1.86987	2.74795
454		H	-1.21799	0.121226	2.99022
455		H	0.420246	0.78917	2.82276
456		C	-0.210996	2.9657	0.015882
457		S	2.31216	2.87114	-0.425236
458		C	0.732712	5.21035	-0.750082
459		H	1.38132	5.81719	-0.10965
460		H	1.04622	5.37065	-1.78688
461		H	-0.289424	5.5826	-0.645707
462		C	-4.05943	-0.382566	-0.08393
463		C	-4.89663	0.716755	0.127764
464		C	-4.59048	-1.55533	-0.622862
465		C	-6.24221	0.640963	-0.195834
466		H	-4.47274	1.62017	0.550521
467		C	-5.93954	-1.6284	-0.944588
468		H	-3.94913	-2.41133	-0.807392
469		C	-6.76686	-0.532068	-0.731808
470		H	-6.88656	1.49778	-0.026556
471		H	-6.34298	-2.54343	-1.36573
472		H	-7.82133	-0.590844	-0.982789
473		C	3.38365	-0.340597	0.006096
474		C	1.8036	-2.21788	0.06161
475		C	3.14043	-1.75852	-0.567408
476		F	4.16115	-0.45955	1.12085
477		F	4.08018	0.430788	-0.868241
478		F	4.1446	-2.60786	-0.310997
479		F	2.97659	-1.66066	-1.90374
480		F	1.12077	-3.04246	-0.762069
481		F	2.07366	-2.90778	1.19839
482		S	-1.62222	-1.75247	0.34344
483		H	-1.25495	3.21914	0.127754
484		N	-2.06424	0.839032	0.533077
485
486	Transition state of I2
487		C	1.12393	-0.915739	0.43367
488		C	1.97588	0.189103	0.382433
489		C	-0.230961	-0.819368	0.685155
490		C	1.43658	1.49557	0.263115
491		C	-2.62906	-0.435297	0.356551
492		C	0.64748	3.71725	-0.50525
493		N	0.209638	1.79017	0.670582
494		C	-0.79045	0.312727	1.38586
495		C	-0.387255	0.582655	2.81319
496		H	-0.706533	1.58135	3.11617
497		H	-0.884101	-0.154471	3.4529
498		H	0.691445	0.487044	2.94422
499		C	-0.25205	2.99729	0.200761
500		S	2.13189	2.80598	-0.660267
501		C	0.507594	5.09672	-1.06153
502		H	1.2035	5.79692	-0.588207
503		H	0.697294	5.11716	-2.13935
504		H	-0.50768	5.46297	-0.890583
505		C	-4.04347	-0.467809	-0.047751
506		C	-4.91017	0.510278	0.449777
507		C	-4.5405	-1.44531	-0.913122
508		C	-6.2475	0.509307	0.084178
509		H	-4.51369	1.25934	1.12499
510		C	-5.87998	-1.44409	-1.27567
511		H	-3.88119	-2.2104	-1.31168
512		C	-6.73609	-0.467265	-0.778731
513		H	-6.91333	1.27165	0.476091
514		H	-6.25542	-2.20772	-1.94906
515		H	-7.78377	-0.467855	-1.06283
516		C	3.36436	-0.225419	0.056046
517		C	1.86652	-2.15609	0.022183
518		C	3.19762	-1.63423	-0.559481
519		F	4.17248	-0.315617	1.14769
520		F	3.98539	0.611554	-0.816155
521		F	4.2287	-2.44715	-0.291462
522		F	3.07214	-1.50821	-1.89679
523		F	1.1824	-2.89092	-0.887292
524		F	2.12307	-2.95982	1.08137
525		S	-1.5102	-1.68283	-0.161656
526		H	-1.25635	3.30447	0.463923
527		N	-2.14533	0.492538	1.11936
528
529	Closed-ring isomer of I3
530		C	0.859332	-0.902541	0.221345
531		C	1.37571	0.43452	0.404851
532		C	0.508758	1.47087	0.206709
533		C	-0.853743	3.46445	-0.448109
534		N	-0.846249	1.23953	0.14882
535		C	-1.57945	2.35866	-0.242128
536		S	0.859346	3.14133	-0.170723
537		C	-1.32348	4.81707	-0.869037
538		H	-1.05932	5.58118	-0.130381
539		H	-0.885504	5.11673	-1.82671
540		H	-2.41066	4.81705	-0.980939
541		C	2.85297	0.434219	0.338485
542		C	1.99806	-1.82608	-0.087068
543		C	3.1758	-0.878588	-0.416759
544		F	3.45871	0.383062	1.55929
545		F	3.36999	1.51132	-0.306379
546		F	4.36349	-1.39951	-0.079615
547		F	3.16697	-0.623857	-1.74247
548		F	1.74118	-2.67555	-1.107
549		F	2.33624	-2.5776	0.991653
550		H	-2.64561	2.26909	-0.373728
551		C	-0.459438	-1.13448	0.213082
552		C	-1.37741	-0.026141	0.725734
553		C	-2.77549	-0.404463	0.272374
554		C	-2.86018	-1.67953	-0.293002
555		C	-3.94937	0.305248	0.507188
556		C	-4.08127	-2.21513	-0.685371
557		C	-5.17592	-0.21727	0.111151
558		H	-3.91952	1.26214	1.0192
559		C	-5.23719	-1.46947	-0.492379
560		H	-4.13027	-3.20395	-1.12942
561		H	-6.08484	0.348472	0.286225
562		H	-6.19471	-1.87769	-0.799581
563		S	-1.3204	-2.54048	-0.405602
564		C	-1.32387	0.065895	2.26041
565		H	-0.303161	0.258646	2.59789
566		H	-1.97388	0.870856	2.61725
567		H	-1.66415	-0.877041	2.69544
568
569	Transition state of I3
570		C	0.825836	-0.903501	0.284275
571		C	1.33745	0.385988	0.461469
572		C	-0.527805	-1.18004	0.283555
573		C	0.492558	1.51274	0.312182
574		C	-2.88021	-1.56797	-0.477314
575		C	-0.719097	3.51445	-0.510944
576		N	-0.82132	1.44985	0.50589
577		C	-1.43983	-0.314143	0.976979
578		C	-1.25462	-0.097051	2.46222
579		H	-1.82186	0.769123	2.81035
580		H	-1.61363	-0.986784	2.98992
581		H	-0.203588	0.051404	2.71232
582		C	-1.49913	2.53418	-0.006549
583		S	0.957587	3.03093	-0.42068
584		C	-1.12724	4.85266	-1.03488
585		H	-0.733317	5.66651	-0.417558
586		H	-0.770711	5.00916	-2.05782
587		H	-2.21719	4.93132	-1.04181
588		C	-4.10418	-1.93654	-1.03286
589		C	-5.25136	-1.27952	-0.616922
590		C	2.82116	0.381964	0.377566
591		C	1.93702	-1.85191	-0.069759
592		C	3.14974	-0.939949	-0.353493
593		F	3.42755	0.372719	1.59632
594		F	3.32827	1.44602	-0.298695
595		F	4.30727	-1.48414	0.046496
596		F	3.21318	-0.693794	-1.67836
597		F	1.6408	-2.62595	-1.1404
598		F	2.23125	-2.68054	0.960834
599		C	-2.80676	-0.553182	0.487185
600		S	-1.32964	-2.2907	-0.85118
601		H	-2.57823	2.56191	0.076348
602		C	-3.97631	0.082541	0.910636
603		C	-5.19297	-0.273591	0.352622
604		H	-4.15741	-2.72454	-1.77689
605		H	-6.20897	-1.55638	-1.04665
606		H	-6.10331	0.22211	0.672984
607		H	-3.92999	0.85194	1.67576
608
609	Closed-ring isomer of I4
610		C	0.745352	-0.963636	0.247518
611		C	1.27953	0.382073	0.367571
612		C	0.429488	1.42764	0.172802
613		C	-0.925697	3.4664	-0.378011
614		N	-0.93607	1.22275	0.141683
615		C	-1.66337	2.37068	-0.165851
616		S	0.794938	3.10007	-0.195464
617		C	-1.38297	4.83977	-0.740531
618		H	-1.05721	5.5789	-0.001057
619		H	-0.991836	5.15153	-1.71458
620		H	-2.47441	4.86989	-0.790424
621		C	2.75505	0.351602	0.280343
622		C	1.85311	-1.9125	-0.089508
623		C	3.04196	-0.983469	-0.450125
624		F	3.37592	0.313289	1.49438
625		F	3.28265	1.40512	-0.393414
626		F	4.22522	-1.51767	-0.11759
627		F	3.02127	-0.754083	-1.78037
628		F	1.56499	-2.75021	-1.10704
629		F	2.20642	-2.67238	0.978284
630		H	-2.73856	2.30426	-0.235243
631		C	-0.573156	-1.13887	0.316182
632		C	-1.48279	-0.00097	0.758888
633		C	-2.80174	-0.515636	0.219042
634		C	-2.59898	-1.83126	-0.19034
635		C	-4.08848	0.001403	0.214177
636		C	-3.61738	-2.64239	-0.651108
637		C	-5.13479	-0.789689	-0.257662
638		H	-4.29432	1.00131	0.583815
639		C	-4.89662	-2.09346	-0.686518
640		H	-3.416	-3.65931	-0.966673
641		H	-6.14294	-0.390116	-0.279745
642		H	-5.72223	-2.69853	-1.0471
643		C	-1.5189	0.162417	2.287
644		H	-0.523501	0.407944	2.66569
645		H	-2.21233	0.961954	2.56654
646		H	-1.85305	-0.767089	2.75482
647		O	-1.29328	-2.2398	-0.073981
648
649	Transition state of I4
650		C	0.693634	-0.94379	0.185552
651		C	1.24801	0.329339	0.388743
652		C	-0.653464	-1.16477	0.302069
653		C	0.424863	1.47515	0.287836
654		C	-2.65174	-1.68024	-0.439126
655		C	-0.750873	3.53495	-0.445348
656		N	-0.882231	1.45474	0.537502
657		C	-1.53773	-0.286107	1.01621
658		C	-1.37889	-0.050566	2.49849
659		H	-1.97022	0.808576	2.82425
660		H	-1.72738	-0.939035	3.03513
661		H	-0.334468	0.126335	2.75951
662		C	-1.54246	2.57177	0.073217
663		S	0.91025	2.98716	-0.441604
664		C	-1.13162	4.8973	-0.925383
665		H	-0.681236	5.68357	-0.310964
666		H	-0.81477	5.06165	-1.96011
667		H	-2.21719	5.01541	-0.88231
668		C	-3.69533	-2.28006	-1.12835
669		C	-4.97214	-1.79808	-0.876161
670		C	2.71981	0.311811	0.188956
671		C	1.73847	-1.86854	-0.366972
672		C	3.0673	-1.18898	0.037066
673		F	3.42491	0.864238	1.20973
674		F	3.10718	0.982111	-0.936545
675		F	3.46147	-1.67873	1.22997
676		F	4.03894	-1.39501	-0.863119
677		F	1.67653	-1.9442	-1.71977
678		F	1.66259	-3.12401	0.118124
679		C	-2.85268	-0.636575	0.468519
680		H	-2.61511	2.63806	0.206093
681		C	-4.1452	-0.180693	0.724464
682		C	-5.20142	-0.762081	0.039585
683		H	-3.50991	-3.0872	-1.82731
684		H	-5.81493	-2.23988	-1.39842
685		H	-6.21533	-0.419174	0.21595
686		H	-4.32162	0.613099	1.44448
687		O	-1.34777	-2.03223	-0.540608

## Sheet: M05
1	Table of Contents
2	Structure				Row
3	Closed-ring isomer of N1				21
4	Transition state of N1				65
5	Closed-ring isomer of N2				109
6	Transition state of N2				152
7	Closed-ring isomer of N3				195
8	Transition state of N3				235
9	Closed-ring isomer of N4				275
10	Transition state of N4				315
11	Closed-ring isomer of I1				355
12	Transition state of I1				399
13	Closed-ring isomer of I2				443
14	Transition state of I2				486
15	Closed-ring isomer of I3				529
16	Transition state of I3				569
17	Closed-ring isomer of I4				609
18	Transition state of I4				649
19
20	Structure	Atom	x	y	z
21	Closed-ring isomer of N1
22		C	0.812161	-0.950264	0.374246
23		C	2.00857	-0.177177	0.237672
24		C	-0.406975	-0.367862	0.524573
25		C	1.88483	1.17575	0.026475
26		C	-2.6966	0.038073	0.190032
27		C	1.89967	3.61727	-0.520019
28		N	0.668571	1.80002	0.177914
29		C	-0.429205	1.10881	0.882517
30		C	-0.293909	1.32563	2.3895
31		H	-0.352929	2.38781	2.64124
32		H	-1.09495	0.7972	2.90954
33		H	0.666189	0.930539	2.73464
34		C	0.701838	3.15467	-0.113559
35		S	3.07789	2.30737	-0.547309
36		C	2.27907	4.99925	-0.922975
37		H	3.08318	5.39466	-0.29405
38		H	2.62194	5.03543	-1.96196
39		H	1.41779	5.66469	-0.829262
40		C	-4.11223	-0.188724	-0.106233
41		C	-5.08737	0.779046	0.182935
42		C	-4.53066	-1.39644	-0.691985
43		C	-6.43033	0.544814	-0.093314
44		H	-4.79409	1.71537	0.648258
45		C	-5.87284	-1.62987	-0.96049
46		H	-3.79435	-2.14776	-0.958705
47		C	-6.83075	-0.660748	-0.663
48		H	-7.16634	1.30753	0.143445
49		H	-6.17142	-2.56937	-1.41623
50		H	-7.87916	-0.843212	-0.87919
51		C	3.1891	-1.05038	0.046311
52		C	1.14926	-2.40096	0.210018
53		C	2.56352	-2.38834	-0.420993
54		F	3.88243	-1.273	1.19237
55		F	4.07852	-0.580483	-0.857545
56		F	3.2905	-3.454	-0.074628
57		F	2.43985	-2.36237	-1.75931
58		F	0.274147	-3.08231	-0.557011
59		F	1.21082	-3.03197	1.40516
60		H	-0.204875	3.73623	-0.012622
61		S	-2.08766	1.70455	0.305452
62		C	-1.71986	-0.896283	0.344171
63		H	-1.90475	-1.96061	0.262609
64
65	Transition state of N1
66		C	0.947243	-0.928175	0.482815
67		C	1.9896	-0.02727	0.266377
68		C	-0.357987	-0.54127	0.823815
69		C	1.71751	1.35979	0.128781
70		C	-2.65988	-0.243831	0.434488
71		C	1.31238	3.66398	-0.686067
72		N	0.630393	1.92107	0.654491
73		C	-0.543419	0.705013	1.54468
74		C	0.074692	0.908501	2.90667
75		H	-0.018088	1.94592	3.23619
76		H	-0.437129	0.266337	3.6285
77		H	1.13212	0.639359	2.89344
78		C	0.37522	3.17324	0.169446
79		S	2.54033	2.45443	-0.953316
80		C	1.39889	5.01958	-1.29997
81		H	2.27344	5.57182	-0.941843
82		H	1.46595	4.96231	-2.39065
83		H	0.507498	5.59814	-1.04682
84		C	-4.0016	-0.393635	-0.126351
85		C	-4.47612	-1.66675	-0.48796
86		C	-4.8517	0.706421	-0.322359
87		C	-5.74039	-1.82618	-1.04087
88		H	-3.85261	-2.53882	-0.316448
89		C	-6.11941	0.542346	-0.870097
90		H	-4.51051	1.70352	-0.05865
91		C	-6.57099	-0.723316	-1.23572
92		H	-6.08345	-2.8209	-1.31066
93		H	-6.75552	1.41091	-1.01474
94		H	-7.56157	-0.850936	-1.66185
95		C	3.2404	-0.73067	-0.126096
96		C	1.41176	-2.32172	0.156636
97		C	2.74752	-2.11889	-0.592624
98		F	4.09784	-0.888501	0.911522
99		F	3.92999	-0.105836	-1.10792
100		F	3.6278	-3.09395	-0.351987
101		F	2.50358	-2.06787	-1.91326
102		F	0.537692	-3.02107	-0.596425
103		F	1.6331	-3.03437	1.28217
104		H	-0.500316	3.70673	0.522581
105		S	-2.25149	1.15328	1.44723
106		H	-1.59209	-1.92737	-0.366513
107		C	-1.57235	-1.04609	0.262162
108
109	Closed-ring isomer of N2
110		C	0.688518	-0.938066	0.369175
111		C	1.94402	-0.264597	0.24422
112		C	-0.469927	-0.25058	0.53751
113		C	1.9382	1.09516	0.041117
114		C	-2.60547	0.212706	0.193837
115		C	2.16693	3.5271	-0.501632
116		N	0.780468	1.82302	0.190311
117		C	-0.373515	1.23437	0.892302
118		C	-0.238067	1.45751	2.39766
119		H	-0.23671	2.52326	2.64134
120		H	-1.07042	0.980442	2.91853
121		H	0.695547	1.01081	2.75225
122		C	0.931684	3.17066	-0.100598
123		S	3.22736	2.1209	-0.522954
124		C	2.66652	4.87082	-0.903063
125		H	3.50311	5.19223	-0.274497
126		H	3.01032	4.87772	-1.94231
127		H	1.8677	5.60984	-0.807421
128		C	-4.01894	-0.033604	-0.095478
129		C	-4.96518	0.998883	-0.146981
130		C	-4.43638	-1.35335	-0.335118
131		C	-6.29663	0.72033	-0.436328
132		H	-4.66641	2.0241	0.051348
133		C	-5.7669	-1.62614	-0.618945
134		H	-3.69805	-2.14666	-0.29843
135		C	-6.70166	-0.591312	-0.672227
136		H	-7.01946	1.52979	-0.472126
137		H	-6.07719	-2.65018	-0.803847
138		H	-7.74211	-0.80757	-0.896251
139		C	3.05	-1.23248	0.056459
140		C	0.897706	-2.41251	0.176179
141		C	2.31978	-2.50546	-0.436124
142		F	3.70603	-1.52389	1.20849
143		F	3.98704	-0.825746	-0.829681
144		F	2.952	-3.63242	-0.098809
145		F	2.21765	-2.44755	-1.77537
146		F	-0.008437	-3.00129	-0.617388
147		F	0.89396	-3.06237	1.36209
148		H	0.077266	3.82692	-0.001158
149		N	-1.73681	-0.725711	0.358327
150		S	-1.98157	1.89851	0.277728
151
152	Transition state of N2
153		C	0.816057	-0.900584	0.505922
154		C	1.93443	-0.102814	0.280587
155		C	-0.44605	-0.380132	0.831899
156		C	1.79344	1.29896	0.089273
157		C	-2.59607	-0.038598	0.414432
158		C	1.62286	3.59597	-0.822643
159		N	0.756798	1.98134	0.5712
160		C	-0.529184	0.906888	1.50461
161		C	0.096345	1.12525	2.86024
162		H	0.10595	2.18244	3.1336
163		H	-0.481714	0.575862	3.60836
164		H	1.12154	0.751674	2.8735
165		C	0.629198	3.23125	0.032575
166		S	2.73486	2.26704	-1.01569
167		C	1.8474	4.91121	-1.48729
168		H	2.76496	5.39219	-1.13418
169		H	1.92546	4.80343	-2.57337
170		H	1.01138	5.58127	-1.27409
171		C	-3.93267	-0.252421	-0.141378
172		C	-4.18804	-1.44078	-0.845192
173		C	-4.96663	0.681906	0.005257
174		C	-5.44467	-1.68143	-1.38309
175		H	-3.38468	-2.16045	-0.958698
176		C	-6.22291	0.437467	-0.539229
177		H	-4.7952	1.60746	0.547989
178		C	-6.46778	-0.7444	-1.23416
179		H	-5.62745	-2.60521	-1.92415
180		H	-7.01292	1.17249	-0.416718
181		H	-7.44967	-0.935395	-1.65702
182		C	3.12717	-0.928619	-0.054051
183		C	1.14771	-2.34338	0.225184
184		C	2.52565	-2.28814	-0.477194
185		F	3.94474	-1.11201	1.01051
186		F	3.88804	-0.404997	-1.04254
187		F	3.30763	-3.32275	-0.157228
188		F	2.33811	-2.27735	-1.80743
189		F	0.245347	-2.9746	-0.53784
190		F	1.26651	-3.03388	1.38132
191		H	-0.195248	3.86061	0.348787
192		S	-2.19773	1.45315	1.3372
193		N	-1.6093	-0.859193	0.295406
194
195	Closed-ring isomer of N3
196		C	-0.12031	-0.839611	0.208857
197		C	1.27594	-0.513473	0.25286
198		C	-1.08925	0.106882	0.287923
199		C	1.6423	0.799501	0.093556
200		C	-3.0772	1.30051	-0.231563
201		C	2.54549	3.09153	-0.333609
202		N	0.693937	1.79124	0.099184
203		C	-0.655135	1.52563	0.631661
204		C	-0.671698	1.77117	2.14047
205		H	-0.409127	2.80556	2.37649
206		H	-1.66631	1.56384	2.53928
207		H	0.044899	1.10225	2.62715
208		C	1.21545	3.0564	-0.124718
209		S	-1.90758	2.62228	-0.205411
210		S	3.21507	1.4642	-0.244548
211		C	-2.52371	0.039787	0.070399
212		C	3.41534	4.26528	-0.619326
213		H	4.20498	4.37199	0.131318
214		H	3.89733	4.18005	-1.59846
215		H	2.81918	5.18067	-0.615884
216		C	2.12353	-1.72365	0.242493
217		C	-0.250779	-2.3211	-0.022611
218		C	1.18935	-2.80095	-0.354269
219		F	2.50587	-2.11841	1.48552
220		F	3.25689	-1.59543	-0.484218
221		F	1.43367	-4.02595	0.119311
222		F	1.34485	-2.81134	-1.68844
223		F	-1.08618	-2.64109	-1.02836
224		F	-0.692976	-2.96116	1.08536
225		H	0.548583	3.90841	-0.125031
226		C	-4.42726	1.45427	-0.527738
227		C	-3.37509	-1.07085	0.117085
228		H	-2.98489	-2.0439	0.389422
229		H	-4.83389	2.43252	-0.764518
230		C	-4.72787	-0.920711	-0.168002
231		C	-5.25038	0.330321	-0.499003
232		H	-5.38169	-1.78614	-0.123821
233		H	-6.30811	0.43722	-0.720233
234
235	Transition state of N3
236		C	0.158702	-0.862464	0.323473
237		C	1.32497	-0.097158	0.266129
238		C	-1.11546	-0.323116	0.551277
239		C	1.25051	1.31317	0.112926
240		C	-3.34024	0.352189	0.063645
241		C	1.27258	3.64819	-0.702988
242		N	0.19691	2.01485	0.51222
243		C	-1.18086	0.912796	1.30161
244		C	-0.613637	1.00791	2.69679
245		H	-0.581342	2.04262	3.04491
246		H	-1.25343	0.432724	3.37181
247		H	0.393872	0.592456	2.73844
248		C	0.177784	3.29089	0.02388
249		S	-2.78858	1.63968	1.1323
250		S	2.34407	2.27753	-0.839502
251		C	-2.37021	-0.656992	-0.103534
252		C	1.62013	4.97865	-1.2782
253		H	2.5153	5.40097	-0.810963
254		H	1.80553	4.91477	-2.35471
255		H	0.795083	5.67676	-1.11904
256		C	2.52554	-0.924392	-0.017513
257		C	0.509948	-2.27568	-0.060262
258		C	2.02677	-2.36553	0.214141
259		F	3.58325	-0.634222	0.771673
260		F	2.96387	-0.796262	-1.29828
261		F	2.22039	-2.70473	1.49976
262		F	2.63812	-3.25943	-0.566628
263		F	0.304404	-2.50326	-1.38125
264		F	-0.174537	-3.21014	0.620643
265		H	-0.650549	3.94231	0.279202
266		C	-2.71517	-1.76547	-0.891824
267		C	-4.59198	0.298918	-0.539102
268		H	-2.00917	-2.57014	-1.05048
269		H	-5.30908	1.10222	-0.399443
270		C	-3.97501	-1.84024	-1.47385
271		C	-4.91017	-0.815868	-1.30905
272		H	-4.22963	-2.71006	-2.07198
273		H	-5.88749	-0.886286	-1.77658
274
275	Closed-ring isomer of N4
276		C	-0.022306	-0.886672	0.320152
277		C	1.26092	-0.239514	0.329792
278		C	-1.16878	-0.170718	0.414102
279		C	1.29674	1.12186	0.125635
280		C	-3.10213	0.939281	-0.036984
281		C	1.5673	3.54758	-0.441211
282		N	0.1458	1.86394	0.198564
283		C	-1.05297	1.28556	0.822698
284		C	-1.02233	1.50217	2.32898
285		H	-1.0078	2.57046	2.56063
286		H	-1.91156	1.05472	2.77831
287		H	-0.137375	1.02941	2.76073
288		C	0.306969	3.20344	-0.110691
289		S	2.62335	2.13685	-0.368351
290		C	-2.5565	-0.352402	0.053212
291		C	2.35691	-1.22636	0.20777
292		C	0.180739	-2.35331	0.080799
293		C	1.65	-2.46295	-0.398968
294		F	2.89763	-1.58018	1.40223
295		F	3.38138	-0.813136	-0.572426
296		F	2.21906	-3.6184	-0.044788
297		F	1.67577	-2.35803	-1.7389
298		F	-0.662999	-2.88162	-0.828602
299		F	0.035865	-3.06179	1.22296
300		C	-4.4059	1.17853	-0.43265
301		C	-3.35608	-1.45093	-0.266618
302		H	-2.9526	-2.4556	-0.216491
303		H	-4.79099	2.19044	-0.495828
304		C	-4.67721	-1.2306	-0.652177
305		C	-5.193	0.065012	-0.73671
306		H	-5.31143	-2.07784	-0.893367
307		H	-0.560334	3.84866	-0.078112
308		C	2.09911	4.88157	-0.834249
309		H	2.89295	5.2131	-0.157283
310		H	2.51155	4.86829	-1.84818
311		H	1.29838	5.62413	-0.805794
312		H	-6.22461	0.214481	-1.04095
313		O	-2.2112	1.92396	0.292301
314
315	Transition state of N4
316		C	0.121693	-0.870733	0.381722
317		C	1.23908	-0.036679	0.323286
318		C	-1.17079	-0.422606	0.640421
319		C	1.06538	1.36967	0.195418
320		C	-3.25925	0.372113	0.2552
321		C	0.945136	3.72188	-0.568825
322		N	-0.038883	1.99238	0.593133
323		C	-1.38237	0.811539	1.35702
324		C	-0.957168	1.03869	2.77402
325		H	-1.05577	2.0906	3.04804
326		H	-1.60732	0.444128	3.42366
327		H	0.074073	0.720814	2.92544
328		C	-0.131859	3.27658	0.135536
329		S	2.10557	2.42763	-0.719238
330		C	-2.42516	-0.717871	-0.019391
331		C	2.46651	-0.790328	-0.042846
332		C	0.511697	-2.24335	-0.085787
333		C	2.04465	-2.27123	0.100261
334		F	3.53375	-0.506815	0.736494
335		F	2.8637	-0.558961	-1.32286
336		F	2.32601	-2.6986	1.34265
337		F	2.6555	-3.06738	-0.780775
338		F	0.224446	-2.41577	-1.3994
339		F	-0.094166	-3.23582	0.587883
340		C	-2.90281	-1.72746	-0.858635
341		C	-4.532	0.523497	-0.256391
342		H	-2.28296	-2.58181	-1.10702
343		H	-5.13499	1.39282	-0.017448
344		C	-4.19412	-1.61106	-1.37033
345		C	-4.99876	-0.505142	-1.07877
346		H	-4.58083	-2.3955	-2.01393
347		H	-1.0031	3.86749	0.395981
348		C	1.2094	5.08346	-1.11474
349		H	1.40717	5.05433	-2.19057
350		H	0.339021	5.72273	-0.949421
351		H	2.07099	5.55435	-0.63095
352		O	-2.64022	1.26589	1.11081
353		H	-6.00002	-0.441478	-1.4933
354
355	Closed-ring isomer of I1
356		C	1.01786	-0.928375	0.359591
357		C	2.03994	0.085113	0.304635
358		C	-0.279281	-0.601889	0.525171
359		C	1.6359	1.38382	0.108365
360		C	-2.72407	-0.130575	0.227877
361		C	1.12756	3.76073	-0.486279
362		N	0.314333	1.73252	0.243739
363		C	-0.632124	0.817483	0.948458
364		C	-0.464412	1.01455	2.46315
365		H	-0.73926	2.03403	2.75119
366		H	-1.11147	0.314584	2.99675
367		H	0.5696	0.830028	2.76448
368		C	0.053242	3.05076	-0.089854
369		S	2.566	2.74417	-0.461625
370		C	1.20189	5.18703	-0.906812
371		H	1.88569	5.75852	-0.270786
372		H	1.55053	5.28552	-1.9399
373		H	0.213604	5.64814	-0.839955
374		C	-4.15823	-0.262663	-0.075496
375		C	-5.0938	0.563492	0.563824
376		C	-4.61859	-1.20103	-1.00951
377		C	-6.4479	0.465968	0.263751
378		H	-4.75623	1.26853	1.31742
379		C	-5.97393	-1.29758	-1.30706
380		H	-3.9078	-1.84529	-1.51839
381		C	-6.89288	-0.464096	-0.673797
382		H	-7.15889	1.10993	0.77295
383		H	-6.31166	-2.02624	-2.03787
384		H	-7.95123	-0.543696	-0.903653
385		C	3.36996	-0.523679	0.080531
386		C	1.64488	-2.2631	0.090756
387		C	3.02588	-1.91232	-0.512858
388		F	4.08139	-0.708679	1.22333
389		F	4.16309	0.184081	-0.756082
390		F	3.95181	-2.83929	-0.25232
391		F	2.89596	-1.79041	-1.84566
392		F	0.924809	-3.04281	-0.737511
393		F	1.83379	-2.95559	1.23687
394		C	-2.06208	1.00039	0.533189
395		S	-1.70582	-1.58397	0.233985
396		H	-2.56424	1.95993	0.597308
397		H	-0.958236	3.4251	-0.01689
398
399	Transition state of I1
400		C	1.06531	-0.914516	0.441826
401		C	2.00809	0.123443	0.382774
402		C	-0.278889	-0.700854	0.698769
403		C	1.566	1.4626	0.251974
404		C	-2.71376	-0.262953	0.341583
405		C	0.949394	3.72956	-0.54826
406		N	0.354582	1.85368	0.650652
407		C	-0.72537	0.493387	1.39721
408		C	-0.258098	0.718133	2.81792
409		H	-0.49467	1.73166	3.15189
410		H	-0.778987	0.008567	3.46859
411		H	0.814992	0.554229	2.92478
412		C	-0.008466	3.0802	0.164762
413		S	2.35872	2.70807	-0.683453
414		C	0.924813	5.11091	-1.10775
415		H	1.66556	5.75722	-0.626117
416		H	1.13185	5.11289	-2.18233
417		H	-0.061305	5.55553	-0.954099
418		C	-4.12654	-0.341512	-0.058267
419		C	-5.12601	0.187007	0.772506
420		C	-4.50862	-0.932056	-1.27157
421		C	-6.46303	0.137042	0.394848
422		H	-4.8532	0.615976	1.73167
423		C	-5.84685	-0.982361	-1.6463
424		H	-3.74952	-1.33692	-1.93429
425		C	-6.82913	-0.446574	-0.816479
426		H	-7.2226	0.545862	1.05474
427		H	-6.12136	-1.43894	-2.59255
428		H	-7.87408	-0.48827	-1.10902
429		C	3.36078	-0.410006	0.073635
430		C	1.71469	-2.21155	0.046421
431		C	3.07273	-1.79219	-0.556921
432		F	4.12665	-0.581918	1.18012
433		F	4.07469	0.366994	-0.773183
434		F	4.0382	-2.68612	-0.326248
435		F	2.93181	-1.63684	-1.88464
436		F	0.98301	-2.92191	-0.836149
437		F	1.92695	-2.99908	1.12208
438		C	-2.13457	0.698094	1.11595
439		S	-1.59928	-1.51737	-0.138046
440		H	-2.69199	1.53057	1.53316
441		H	-0.984354	3.47974	0.417311
442
443	Closed-ring isomer of I2
444		C	1.08454	-0.933238	0.355121
445		C	2.02154	0.154969	0.27317
446		C	-0.226652	-0.709347	0.566754
447		C	1.51117	1.42393	0.119528
448		C	-2.6278	-0.267334	0.26488
449		C	0.792511	3.76909	-0.38721
450		N	0.176039	1.66809	0.306711
451		C	-0.698	0.67492	0.982813
452		C	-0.619107	0.881264	2.49789
453		H	-0.99633	1.87162	2.76519
454		H	-1.22554	0.126064	3.00284
455		H	0.414337	0.78439	2.8387
456		C	-0.209071	2.96725	0.024316
457		S	2.30767	2.86823	-0.440797
458		C	0.742451	5.20692	-0.770696
459		H	1.39695	5.81525	-0.138025
460		H	1.05111	5.35886	-1.80998
461		H	-0.277157	5.58435	-0.66358
462		C	-4.05429	-0.386442	-0.085469
463		C	-4.90176	0.704778	0.151997
464		C	-4.58432	-1.55132	-0.652741
465		C	-6.25002	0.629256	-0.171811
466		H	-4.48407	1.60192	0.595237
467		C	-5.93528	-1.62385	-0.975532
468		H	-3.94024	-2.40069	-0.859659
469		C	-6.7705	-0.535417	-0.735619
470		H	-6.89847	1.47906	0.019076
471		H	-6.3339	-2.53129	-1.41844
472		H	-7.82547	-0.594102	-0.986641
473		C	3.38728	-0.346247	0.004628
474		C	1.80496	-2.21725	0.072698
475		C	3.13652	-1.76247	-0.572057
476		F	4.15135	-0.465846	1.12194
477		F	4.09097	0.41811	-0.861582
478		F	4.13919	-2.61204	-0.332788
479		F	2.95937	-1.66186	-1.90104
480		F	1.12151	-3.05148	-0.732251
481		F	2.07843	-2.88674	1.21467
482		S	-1.61418	-1.74728	0.327465
483		H	-1.25172	3.22692	0.143686
484		N	-2.06431	0.846832	0.545929
485
486	Transition state of I2
487		C	1.13115	-0.914392	0.418722
488		C	1.97698	0.198246	0.353476
489		C	-0.227391	-0.823483	0.688604
490		C	1.42563	1.50254	0.248504
491		C	-2.6239	-0.443388	0.358385
492		C	0.615261	3.72255	-0.500858
493		N	0.195336	1.78572	0.668588
494		C	-0.794264	0.315935	1.39128
495		C	-0.389319	0.574619	2.81933
496		H	-0.71977	1.56483	3.13779
497		H	-0.878576	-0.174225	3.45053
498		H	0.689343	0.488477	2.95404
499		C	-0.275969	2.98505	0.215644
500		S	2.10051	2.82267	-0.674758
501		C	0.468463	5.10569	-1.03693
502		H	1.15727	5.80449	-0.551582
503		H	0.662086	5.14267	-2.11336
504		H	-0.549877	5.46211	-0.865129
505		C	-4.03531	-0.484982	-0.050502
506		C	-4.90502	0.505514	0.429629
507		C	-4.53999	-1.47638	-0.902716
508		C	-6.24423	0.503608	0.061632
509		H	-4.50956	1.26542	1.09409
510		C	-5.88105	-1.47603	-1.26758
511		H	-3.88568	-2.25256	-1.28891
512		C	-6.73696	-0.486399	-0.787496
513		H	-6.90743	1.27524	0.441142
514		H	-6.25785	-2.24992	-1.92923
515		H	-7.78468	-0.488016	-1.07333
516		C	3.37119	-0.213778	0.041299
517		C	1.88839	-2.15422	0.032478
518		C	3.20949	-1.62599	-0.569197
519		F	4.15564	-0.296721	1.14408
520		F	4.00184	0.615505	-0.821435
521		F	4.24737	-2.42739	-0.314737
522		F	3.06757	-1.50639	-1.90017
523		F	1.21891	-2.92447	-0.849346
524		F	2.15973	-2.9176	1.11148
525		S	-1.49789	-1.68687	-0.15749
526		H	-1.27964	3.28819	0.491494
527		N	-2.14334	0.489389	1.12818
528
529	Closed-ring isomer of I3
530		C	0.863023	-0.898371	0.216129
531		C	1.38075	0.432723	0.402904
532		C	0.5067	1.47615	0.212668
533		C	-0.847497	3.46706	-0.45435
534		N	-0.850342	1.24813	0.168249
535		C	-1.57894	2.3578	-0.23221
536		S	0.859938	3.13751	-0.182156
537		C	-1.31066	4.81745	-0.877849
538		H	-1.03723	5.58381	-0.145181
539		H	-0.877312	5.10957	-1.83975
540		H	-2.39819	4.82345	-0.982688
541		C	2.85979	0.428335	0.34186
542		C	2.00053	-1.82635	-0.081774
543		C	3.17623	-0.880199	-0.424758
544		F	3.4499	0.363645	1.56371
545		F	3.38711	1.50341	-0.286268
546		F	4.36541	-1.39996	-0.108193
547		F	3.15225	-0.62146	-1.744
548		F	1.74676	-2.68803	-1.08541
549		F	2.33341	-2.55866	1.00525
550		H	-2.64762	2.27431	-0.357503
551		C	-0.465507	-1.12954	0.213493
552		C	-1.38227	-0.029198	0.737338
553		C	-2.77639	-0.400315	0.278421
554		C	-2.85756	-1.67408	-0.301099
555		C	-3.95754	0.301004	0.520808
556		C	-4.08035	-2.21211	-0.701305
557		C	-5.1844	-0.222132	0.117195
558		H	-3.93365	1.25255	1.04501
559		C	-5.24019	-1.47049	-0.501339
560		H	-4.12569	-3.19701	-1.15542
561		H	-6.09598	0.338237	0.298896
562		H	-6.19604	-1.87964	-0.814434
563		S	-1.32074	-2.52546	-0.423361
564		C	-1.32684	0.055798	2.26936
565		H	-0.305908	0.236603	2.61092
566		H	-1.96929	0.863016	2.63319
567		H	-1.67491	-0.886475	2.69862
568
569	Transition state of I3
570		C	0.834861	-0.897957	0.270947
571		C	1.34315	0.397375	0.437836
572		C	-0.523945	-1.18118	0.284203
573		C	0.486382	1.51912	0.301605
574		C	-2.86854	-1.57494	-0.481479
575		C	-0.744243	3.51349	-0.509598
576		N	-0.830487	1.44424	0.503947
577		C	-1.44205	-0.312538	0.980177
578		C	-1.25592	-0.108997	2.46522
579		H	-1.82997	0.747077	2.82691
580		H	-1.60838	-1.00683	2.98284
581		H	-0.207115	0.04302	2.72119
582		C	-1.51588	2.5183	0.003712
583		S	0.932726	3.04103	-0.43223
584		C	-1.16037	4.8529	-1.01433
585		H	-0.772743	5.66154	-0.38651
586		H	-0.804661	5.02555	-2.03472
587		H	-2.25057	4.92386	-1.02107
588		C	-4.09127	-1.95276	-1.04408
589		C	-5.24627	-1.30437	-0.628627
590		C	2.82952	0.391528	0.371155
591		C	1.95266	-1.84635	-0.061359
592		C	3.15943	-0.92996	-0.361332
593		F	3.4075	0.372948	1.59766
594		F	3.3527	1.45063	-0.28778
595		F	4.32133	-1.4647	0.023837
596		F	3.20781	-0.687536	-1.68217
597		F	1.67135	-2.64597	-1.11
598		F	2.24463	-2.64318	0.988488
599		C	-2.80344	-0.558987	0.490081
600		S	-1.31943	-2.28613	-0.852005
601		H	-2.59567	2.54457	0.096534
602		C	-3.98466	0.064822	0.910987
603		C	-5.19903	-0.299509	0.346945
604		H	-4.1358	-2.739	-1.7912
605		H	-6.20045	-1.58777	-1.06312
606		H	-6.1147	0.18751	0.667308
607		H	-3.94929	0.832834	1.67935
608
609	Closed-ring isomer of I4
610		C	0.749566	-0.957251	0.259193
611		C	1.28787	0.381095	0.382066
612		C	0.430543	1.43344	0.190484
613		C	-0.914484	3.46854	-0.383684
614		N	-0.93618	1.23305	0.17365
615		C	-1.65847	2.37065	-0.151756
616		S	0.79907	3.0954	-0.199422
617		C	-1.36304	4.83781	-0.758513
618		H	-1.03028	5.58296	-0.028531
619		H	-0.973344	5.13645	-1.73704
620		H	-2.45406	4.87438	-0.805222
621		C	2.76414	0.342601	0.280015
622		C	1.85134	-1.91215	-0.076818
623		C	3.03056	-0.985886	-0.472256
624		F	3.38693	0.282778	1.48628
625		F	3.2963	1.39541	-0.379762
626		F	4.22092	-1.5206	-0.186106
627		F	2.96821	-0.748141	-1.79452
628		F	1.54612	-2.76879	-1.06591
629		F	2.21694	-2.64444	0.999752
630		H	-2.73527	2.31088	-0.216534
631		C	-0.576532	-1.13295	0.330289
632		C	-1.48791	-0.002312	0.77794
633		C	-2.79961	-0.508663	0.222704
634		C	-2.59036	-1.82306	-0.199704
635		C	-4.09232	0.002683	0.218988
636		C	-3.60721	-2.63498	-0.675486
637		C	-5.13534	-0.787645	-0.267984
638		H	-4.30541	0.997454	0.600838
639		C	-4.88936	-2.08845	-0.711432
640		H	-3.40092	-3.64845	-1.00072
641		H	-6.1455	-0.391572	-0.289643
642		H	-5.71107	-2.69299	-1.08321
643		C	-1.53613	0.15481	2.30351
644		H	-0.545074	0.395485	2.69501
645		H	-2.23054	0.952801	2.58317
646		H	-1.87596	-0.776252	2.76323
647		O	-1.29034	-2.2268	-0.081149
648
649	Transition state of I4
650		C	0.704307	-0.937993	0.189642
651		C	1.25661	0.341289	0.373943
652		C	-0.645749	-1.16988	0.320828
653		C	0.420776	1.48155	0.282978
654		C	-2.62969	-1.69445	-0.435699
655		C	-0.77387	3.53496	-0.435044
656		N	-0.888838	1.44822	0.539992
657		C	-1.5413	-0.285474	1.0251
658		C	-1.39943	-0.051319	2.50706
659		H	-2.00377	0.798869	2.83249
660		H	-1.7456	-0.944317	3.0371
661		H	-0.361066	0.133833	2.78496
662		C	-1.55699	2.55523	0.090115
663		S	0.887933	2.99893	-0.443265
664		C	-1.16156	4.89866	-0.894867
665		H	-0.717941	5.67943	-0.268892
666		H	-0.84404	5.07988	-1.92632
667		H	-2.24774	5.00875	-0.852508
668		C	-3.66475	-2.30406	-1.13565
669		C	-4.94881	-1.82472	-0.900885
670		C	2.72583	0.323696	0.144997
671		C	1.75115	-1.86372	-0.355497
672		C	3.0737	-1.18244	0.066959
673		F	3.44009	0.938147	1.11467
674		F	3.08279	0.925392	-1.02166
675		F	3.41825	-1.62258	1.28894
676		F	4.07418	-1.43203	-0.781836
677		F	1.70161	-1.93249	-1.70393
678		F	1.6666	-3.11608	0.12207
679		C	-2.84564	-0.643844	0.467189
680		H	-2.63006	2.61859	0.233581
681		C	-4.14696	-0.192522	0.704382
682		C	-5.19431	-0.782896	0.008008
683		H	-3.4676	-3.11437	-1.82862
684		H	-5.78309	-2.2734	-1.43193
685		H	-6.21232	-0.443226	0.170394
686		H	-4.33669	0.605247	1.41788
687		O	-1.32832	-2.04067	-0.520182

## Sheet: M06
1	Table of Contents
2	Structure				Row
3	Closed-ring isomer of N1				21
4	Transition state of N1				65
5	Closed-ring isomer of N2				109
6	Transition state of N2				152
7	Closed-ring isomer of N3				195
8	Transition state of N3				235
9	Closed-ring isomer of N4				275
10	Transition state of N4				315
11	Closed-ring isomer of I1				355
12	Transition state of I1				399
13	Closed-ring isomer of I2				443
14	Transition state of I2				486
15	Closed-ring isomer of I3				529
16	Transition state of I3				569
17	Closed-ring isomer of I4				609
18	Transition state of I4				649
19
20	Structure	Atom	x	y	z
21	Closed-ring isomer of N1
22		C	0.804458	-0.957217	0.375138
23		C	2.0078	-0.189218	0.249816
24		C	-0.410518	-0.371139	0.504889
25		C	1.89881	1.15826	0.030216
26		C	-2.69709	0.040531	0.179723
27		C	1.93194	3.60981	-0.484287
28		N	0.679092	1.78531	0.149679
29		C	-0.425526	1.10775	0.844666
30		C	-0.315289	1.33322	2.34678
31		H	-0.374573	2.40248	2.58892
32		H	-1.13272	0.810277	2.8569
33		H	0.640505	0.934289	2.71352
34		C	0.727202	3.14913	-0.112113
35		S	3.11443	2.29119	-0.509707
36		C	2.32723	4.99179	-0.858511
37		H	3.12535	5.37618	-0.209548
38		H	2.69039	5.04556	-1.89342
39		H	1.46689	5.66508	-0.769963
40		C	-4.1117	-0.17848	-0.098876
41		C	-5.06173	0.82912	0.113933
42		C	-4.55341	-1.41571	-0.592858
43		C	-6.40691	0.605857	-0.149717
44		H	-4.74438	1.79247	0.512575
45		C	-5.89722	-1.6381	-0.847893
46		H	-3.82897	-2.20157	-0.799847
47		C	-6.83163	-0.628354	-0.628154
48		H	-7.12817	1.40192	0.026188
49		H	-6.21776	-2.60425	-1.23354
50		H	-7.88576	-0.803349	-0.834703
51		C	3.17659	-1.07404	0.057257
52		C	1.14175	-2.40496	0.213446
53		C	2.5327	-2.38124	-0.458002
54		F	3.83928	-1.35317	1.20842
55		F	4.08874	-0.589075	-0.812868
56		F	3.25712	-3.46927	-0.191603
57		F	2.36417	-2.2799	-1.78812
58		F	0.247589	-3.0975	-0.517098
59		F	1.25536	-3.02401	1.41125
60		H	-0.182056	3.73556	-0.015095
61		S	-2.07644	1.71343	0.243733
62		C	-1.72747	-0.894712	0.34481
63		H	-1.92055	-1.9633	0.294459
64
65	Transition state of N1
66		C	0.94078	-0.930097	0.496704
67		C	1.99153	-0.036784	0.293301
68		C	-0.364166	-0.536737	0.818456
69		C	1.73728	1.3491	0.143105
70		C	-2.66032	-0.230609	0.417186
71		C	1.35128	3.64624	-0.705304
72		N	0.648873	1.92277	0.648517
73		C	-0.547362	0.703321	1.53781
74		C	0.07023	0.920586	2.89081
75		H	-0.011609	1.96955	3.20037
76		H	-0.452545	0.296593	3.62685
77		H	1.12895	0.63901	2.88571
78		C	0.404787	3.17219	0.14229
79		S	2.58615	2.42817	-0.946279
80		C	1.44854	4.99036	-1.33454
81		H	2.32665	5.54648	-0.980989
82		H	1.51997	4.92287	-2.42777
83		H	0.557296	5.58036	-1.09187
84		C	-4.0009	-0.378635	-0.132347
85		C	-4.45523	-1.64177	-0.541529
86		C	-4.87011	0.712207	-0.266369
87		C	-5.72203	-1.80051	-1.08143
88		H	-3.8091	-2.50923	-0.414261
89		C	-6.14104	0.54878	-0.801339
90		H	-4.53943	1.70592	0.036781
91		C	-6.57367	-0.706432	-1.21483
92		H	-6.05276	-2.79061	-1.39081
93		H	-6.79709	1.41223	-0.898437
94		H	-7.57055	-0.83406	-1.63235
95		C	3.23177	-0.759703	-0.091463
96		C	1.40123	-2.32133	0.166496
97		C	2.70531	-2.10628	-0.623331
98		F	4.04581	-1.00086	0.964542
99		F	3.97173	-0.117622	-1.02191
100		F	3.57423	-3.1084	-0.482639
101		F	2.40503	-1.96375	-1.92599
102		F	0.507289	-3.03524	-0.544712
103		F	1.67906	-3.01858	1.28944
104		H	-0.474222	3.71624	0.481785
105		S	-2.25064	1.17507	1.4314
106		H	-1.5997	-1.92088	-0.379693
107		C	-1.5787	-1.03486	0.248755
108
109	Closed-ring isomer of N2
110		C	0.681692	-0.946191	0.350284
111		C	1.94143	-0.271971	0.244589
112		C	-0.473972	-0.258151	0.495575
113		C	1.94679	1.08127	0.03767
114		C	-2.61195	0.20473	0.165501
115		C	2.18992	3.52491	-0.459743
116		N	0.781993	1.80754	0.147695
117		C	-0.376593	1.22632	0.835892
118		C	-0.269985	1.45409	2.33744
119		H	-0.275806	2.52569	2.57615
120		H	-1.11632	0.975833	2.84452
121		H	0.660818	1.00822	2.71401
122		C	0.946268	3.1647	-0.1056
123		S	3.25951	2.11342	-0.476169
124		C	2.70362	4.87109	-0.820508
125		H	3.52376	5.18301	-0.160374
126		H	3.08174	4.90004	-1.85095
127		H	1.90198	5.61379	-0.736555
128		C	-4.0264	-0.032477	-0.093891
129		C	-4.95225	1.01342	-0.165989
130		C	-4.46542	-1.35104	-0.281022
131		C	-6.29024	0.748767	-0.425999
132		H	-4.62822	2.04147	-0.004213
133		C	-5.80241	-1.60973	-0.534923
134		H	-3.73425	-2.15466	-0.227095
135		C	-6.71852	-0.561799	-0.609705
136		H	-7.00246	1.56982	-0.479326
137		H	-6.13475	-2.63588	-0.679966
138		H	-7.76813	-0.76844	-0.81078
139		C	3.04285	-1.24434	0.077077
140		C	0.903036	-2.41789	0.169761
141		C	2.31287	-2.49279	-0.464136
142		F	3.648	-1.57727	1.24518
143		F	4.01387	-0.824883	-0.762952
144		F	2.94479	-3.63482	-0.188952
145		F	2.19011	-2.36771	-1.79743
146		F	-0.008749	-3.03054	-0.595741
147		F	0.941821	-3.05195	1.36382
148		H	0.08631	3.82219	-0.014924
149		N	-1.74642	-0.732746	0.336935
150		S	-1.97805	1.89673	0.197928
151
152	Transition state of N2
153		C	0.820317	-0.904881	0.531516
154		C	1.93754	-0.104246	0.310675
155		C	-0.442034	-0.388846	0.848307
156		C	1.79986	1.29321	0.111355
157		C	-2.59102	-0.049812	0.415719
158		C	1.61618	3.57974	-0.828883
159		N	0.762548	1.97735	0.585665
160		C	-0.5315	0.890198	1.51914
161		C	0.094646	1.12334	2.865
162		H	0.110892	2.18934	3.12009
163		H	-0.48832	0.588929	3.62605
164		H	1.12207	0.743467	2.8849
165		C	0.628324	3.2223	0.028861
166		S	2.74374	2.2533	-1.01003
167		C	1.83047	4.88479	-1.50937
168		H	2.75081	5.37797	-1.17028
169		H	1.90155	4.76796	-2.59841
170		H	0.991304	5.55731	-1.29764
171		C	-3.92146	-0.257998	-0.142113
172		C	-4.18093	-1.44673	-0.838661
173		C	-4.94372	0.685865	-0.003528
174		C	-5.43534	-1.6788	-1.37945
175		H	-3.37799	-2.17346	-0.942706
176		C	-6.19793	0.450014	-0.551189
177		H	-4.76157	1.61523	0.537135
178		C	-6.44855	-0.732308	-1.23956
179		H	-5.62582	-2.60568	-1.91755
180		H	-6.98439	1.19372	-0.436648
181		H	-7.43255	-0.917313	-1.66654
182		C	3.11943	-0.936784	-0.038599
183		C	1.16263	-2.34134	0.241158
184		C	2.49037	-2.25159	-0.536718
185		F	3.90051	-1.20722	1.03434
186		F	3.91599	-0.381808	-0.978384
187		F	3.27607	-3.31429	-0.356009
188		F	2.21776	-2.12305	-1.8466
189		F	0.232383	-3.00463	-0.454199
190		F	1.38275	-3.01374	1.39427
191		H	-0.200721	3.8539	0.341051
192		S	-2.19853	1.44869	1.34421
193		N	-1.60565	-0.868397	0.301602
194
195	Closed-ring isomer of N3
196		C	-0.1318	-0.84348	0.207978
197		C	1.26828	-0.525005	0.266863
198		C	-1.08974	0.11005	0.261783
199		C	1.65071	0.776088	0.095177
200		C	-3.07283	1.31907	-0.234721
201		C	2.57347	3.06785	-0.310609
202		N	0.706443	1.77356	0.063775
203		C	-0.641227	1.52516	0.593569
204		C	-0.665079	1.77817	2.09561
205		H	-0.390613	2.81582	2.32565
206		H	-1.66985	1.5855	2.48936
207		H	0.04255	1.10103	2.59433
208		C	1.2428	3.04031	-0.13569
209		S	-1.88216	2.63299	-0.251422
210		S	3.2411	1.43009	-0.210183
211		C	-2.52488	0.057343	0.061526
212		C	3.45639	4.23343	-0.571175
213		H	4.23215	4.33554	0.199265
214		H	3.96473	4.15113	-1.54096
215		H	2.8659	5.15673	-0.579591
216		C	2.09659	-1.74572	0.2549
217		C	-0.258593	-2.32632	-0.0009
218		C	1.1646	-2.77646	-0.409983
219		F	2.40572	-2.19736	1.49862
220		F	3.26155	-1.61011	-0.41428
221		F	1.42426	-4.03663	-0.057768
222		F	1.28342	-2.65963	-1.74366
223		F	-1.15054	-2.67854	-0.943802
224		F	-0.606428	-2.95904	1.14388
225		H	0.577396	3.899	-0.144923
226		C	-4.42474	1.48244	-0.499591
227		C	-3.37936	-1.04649	0.126107
228		H	-2.98475	-2.02447	0.388403
229		H	-4.82838	2.46672	-0.730377
230		C	-4.73449	-0.887258	-0.131256
231		C	-5.25435	0.366024	-0.45049
232		H	-5.39529	-1.74974	-0.074356
233		H	-6.31839	0.47948	-0.649054
234
235	Transition state of N3
236		C	0.136643	-0.862868	0.345354
237		C	1.31816	-0.123261	0.292426
238		C	-1.12262	-0.296774	0.562818
239		C	1.27962	1.28372	0.132655
240		C	-3.33103	0.412336	0.057861
241		C	1.36141	3.60829	-0.709973
242		N	0.240253	2.01371	0.515071
243		C	-1.16723	0.938996	1.30345
244		C	-0.601863	1.04269	2.69234
245		H	-0.546155	2.08734	3.02075
246		H	-1.25965	0.494667	3.3792
247		H	0.399773	0.603707	2.74673
248		C	0.255682	3.28655	0.008399
249		S	-2.75829	1.70543	1.1226
250		S	2.4124	2.21033	-0.822531
251		C	-2.37764	-0.610475	-0.098437
252		C	1.73986	4.92014	-1.29954
253		H	2.64643	5.33197	-0.837211
254		H	1.92616	4.8426	-2.37844
255		H	0.92896	5.64222	-1.14993
256		C	2.49128	-0.975197	-0.018104
257		C	0.455111	-2.27377	-0.060613
258		C	1.9629	-2.39971	0.229806
259		F	3.57727	-0.704758	0.737134
260		F	2.89153	-0.864007	-1.31279
261		F	2.13067	-2.71684	1.52465
262		F	2.56018	-3.32103	-0.526869
263		F	0.26711	-2.46591	-1.38966
264		F	-0.260172	-3.20573	0.589591
265		H	-0.561833	3.96246	0.249578
266		C	-2.72678	-1.71445	-0.885364
267		C	-4.57705	0.373035	-0.549283
268		H	-2.023	-2.52792	-1.03736
269		H	-5.2853	1.1893	-0.416502
270		C	-3.98265	-1.7742	-1.4739
271		C	-4.90459	-0.739493	-1.31608
272		H	-4.24562	-2.64306	-2.07438
273		H	-5.882	-0.80021	-1.79042
274
275	Closed-ring isomer of N4
276		C	-0.06274	-0.886185	0.316731
277		C	1.24791	-0.290824	0.328949
278		C	-1.17558	-0.123843	0.383696
279		C	1.34851	1.05948	0.11306
280		C	-3.06541	1.05573	-0.072656
281		C	1.73876	3.48294	-0.406092
282		N	0.225881	1.84958	0.147602
283		C	-0.999048	1.33428	0.75953
284		C	-0.987422	1.57131	2.25846
285		H	-0.929271	2.64611	2.47292
286		H	-1.90803	1.16844	2.69739
287		H	-0.12855	1.06417	2.71455
288		C	0.459215	3.19149	-0.120999
289		S	2.73825	2.0202	-0.333455
290		C	-2.57541	-0.253969	0.052263
291		C	2.29478	-1.3268	0.209116
292		C	0.090023	-2.35974	0.101759
293		C	1.53267	-2.50802	-0.430483
294		F	2.78885	-1.7398	1.40435
295		F	3.35099	-0.94802	-0.542873
296		F	2.06718	-3.6985	-0.153492
297		F	1.51629	-2.33303	-1.76354
298		F	-0.804026	-2.88743	-0.755577
299		F	-0.011435	-3.03905	1.26649
300		C	-4.36302	1.33801	-0.449479
301		C	-3.42742	-1.32495	-0.21037
302		H	-3.06773	-2.34718	-0.127717
303		H	-4.70411	2.36628	-0.540268
304		C	-4.74325	-1.05955	-0.577113
305		C	-5.20281	0.252163	-0.698304
306		H	-5.42123	-1.88717	-0.774705
307		H	-0.382222	3.87638	-0.098809
308		C	2.34158	4.79396	-0.75886
309		H	3.13363	5.07996	-0.054062
310		H	2.78414	4.78275	-1.76374
311		H	1.57428	5.57631	-0.739064
312		H	-6.23562	0.435714	-0.98837
313		O	-2.12341	2.01343	0.20132
314
315	Transition state of N4
316		C	0.110814	-0.87245	0.407077
317		C	1.23893	-0.054109	0.353661
318		C	-1.17329	-0.408394	0.654319
319		C	1.08619	1.34925	0.21746
320		C	-3.24869	0.408102	0.255816
321		C	0.994279	3.69467	-0.573708
322		N	-0.012449	1.98846	0.601187
323		C	-1.37176	0.827434	1.36434
324		C	-0.938561	1.06197	2.77235
325		H	-1.0168	2.1238	3.03024
326		H	-1.59714	0.486352	3.43627
327		H	0.092455	0.727945	2.92172
328		C	-0.088298	3.27139	0.126415
329		S	2.15188	2.38456	-0.704193
330		C	-2.42602	-0.689571	-0.013593
331		C	2.44308	-0.821357	-0.050101
332		C	0.479009	-2.23683	-0.089665
333		C	2.00445	-2.29103	0.117037
334		F	3.54448	-0.544206	0.680244
335		F	2.78517	-0.605217	-1.34856
336		F	2.2557	-2.68759	1.37605
337		F	2.61497	-3.11797	-0.732661
338		F	0.214295	-2.36047	-1.41345
339		F	-0.15596	-3.23697	0.542521
340		C	-2.90379	-1.69072	-0.858063
341		C	-4.51485	0.571038	-0.259861
342		H	-2.28567	-2.55075	-1.10717
343		H	-5.11165	1.4482	-0.022345
344		C	-4.1896	-1.56115	-1.37583
345		C	-4.98529	-0.451207	-1.08544
346		H	-4.5805	-2.34123	-2.02643
347		H	-0.958614	3.8745	0.375327
348		C	1.2727	5.04291	-1.13627
349		H	1.46849	5.00148	-2.21554
350		H	0.407732	5.69714	-0.977138
351		H	2.14281	5.51493	-0.661446
352		O	-2.62275	1.29961	1.11488
353		H	-5.98585	-0.379155	-1.50666
354
355	Closed-ring isomer of I1
356		C	1.009	-0.931436	0.369203
357		C	2.04264	0.071687	0.299618
358		C	-0.281392	-0.595501	0.525013
359		C	1.65753	1.36872	0.094066
360		C	-2.72306	-0.106058	0.217248
361		C	1.17709	3.76532	-0.458502
362		N	0.335012	1.72795	0.208576
363		C	-0.624819	0.834227	0.911737
364		C	-0.483767	1.05225	2.4216
365		H	-0.765578	2.08048	2.68864
366		H	-1.14371	0.356747	2.95489
367		H	0.549433	0.872121	2.74433
368		C	0.094721	3.0624	-0.087643
369		S	2.61334	2.72983	-0.448762
370		C	1.27267	5.1954	-0.848838
371		H	1.96186	5.74967	-0.197724
372		H	1.62903	5.31454	-1.88071
373		H	0.287341	5.67066	-0.778104
374		C	-4.15249	-0.237769	-0.081344
375		C	-5.06878	0.681019	0.444292
376		C	-4.62727	-1.27037	-0.897158
377		C	-6.42006	0.580967	0.14524
378		H	-4.71516	1.46362	1.1143
379		C	-5.98074	-1.37097	-1.19223
380		H	-3.92483	-1.98778	-1.32072
381		C	-6.88059	-0.445173	-0.674908
382		H	-7.12038	1.30056	0.565454
383		H	-6.3332	-2.17699	-1.83298
384		H	-7.94145	-0.527106	-0.903936
385		C	3.35799	-0.560239	0.068297
386		C	1.62338	-2.2709	0.11411
387		C	2.97846	-1.92929	-0.542075
388		F	4.06301	-0.78786	1.20679
389		F	4.16412	0.143424	-0.756495
390		F	3.90321	-2.87125	-0.34829
391		F	2.78494	-1.76876	-1.86328
392		F	0.871699	-3.06759	-0.665566
393		F	1.86112	-2.93252	1.26919
394		C	-2.04753	1.02424	0.47654
395		S	-1.72271	-1.58041	0.292216
396		H	-2.53256	1.999	0.494492
397		H	-0.916524	3.44795	-0.010047
398
399	Transition state of I1
400		C	1.06934	-0.917597	0.467034
401		C	2.00939	0.122626	0.407451
402		C	-0.273473	-0.71239	0.718051
403		C	1.5689	1.45747	0.266906
404		C	-2.70845	-0.263688	0.349862
405		C	0.94021	3.71352	-0.559634
406		N	0.35639	1.84787	0.658064
407		C	-0.723957	0.479077	1.40892
408		C	-0.254805	0.723776	2.81984
409		H	-0.493721	1.74688	3.13646
410		H	-0.774178	0.022013	3.48649
411		H	0.823302	0.564111	2.92653
412		C	-0.012744	3.06958	0.156072
413		S	2.36497	2.69976	-0.68317
414		C	0.907194	5.08416	-1.13593
415		H	1.64911	5.74466	-0.667978
416		H	1.10842	5.07665	-2.21508
417		H	-0.082681	5.52939	-0.982373
418		C	-4.11452	-0.339071	-0.053314
419		C	-5.10466	0.278245	0.721359
420		C	-4.49869	-1.01758	-1.21585
421		C	-6.43693	0.228631	0.336843
422		H	-4.82575	0.778038	1.64783
423		C	-5.83264	-1.06896	-1.59702
424		H	-3.7399	-1.4913	-1.83834
425		C	-6.80615	-0.444435	-0.824207
426		H	-7.19393	0.709208	0.954008
427		H	-6.11211	-1.59715	-2.50666
428		H	-7.85192	-0.486333	-1.12285
429		C	3.35351	-0.414276	0.079329
430		C	1.72613	-2.20623	0.065633
431		C	3.0409	-1.76247	-0.600602
432		F	4.1125	-0.654716	1.17732
433		F	4.07815	0.387159	-0.732489
434		F	4.01986	-2.66057	-0.477072
435		F	2.81223	-1.53903	-1.9067
436		F	0.970662	-2.95129	-0.764198
437		F	2.01553	-2.96224	1.14619
438		C	-2.12845	0.692355	1.12386
439		S	-1.59807	-1.53244	-0.127254
440		H	-2.67828	1.53419	1.54283
441		H	-0.994492	3.46718	0.404439
442
443	Closed-ring isomer of I2
444		C	1.07684	-0.939572	0.361918
445		C	2.02493	0.141498	0.279238
446		C	-0.230249	-0.70752	0.559104
447		C	1.53119	1.41038	0.117267
448		C	-2.63131	-0.245241	0.257738
449		C	0.832863	3.77157	-0.358162
450		N	0.19333	1.66166	0.283152
451		C	-0.689347	0.683031	0.956002
452		C	-0.625199	0.894897	2.46594
453		H	-1.00255	1.89277	2.72328
454		H	-1.2426	0.140976	2.96957
455		H	0.409305	0.794906	2.81716
456		C	-0.176606	2.97518	0.029262
457		S	2.3504	2.8578	-0.419271
458		C	0.800696	5.21208	-0.720119
459		H	1.46093	5.8088	-0.076588
460		H	1.11506	5.37977	-1.7589
461		H	-0.217949	5.60182	-0.61118
462		C	-4.05294	-0.362256	-0.088323
463		C	-4.88001	0.755701	0.068659
464		C	-4.5965	-1.55459	-0.57293
465		C	-6.22574	0.678821	-0.254996
466		H	-4.44444	1.67588	0.451558
467		C	-5.94564	-1.629	-0.893783
468		H	-3.96054	-2.42774	-0.716403
469		C	-6.76164	-0.513789	-0.735721
470		H	-6.86334	1.55174	-0.128651
471		H	-6.35963	-2.5611	-1.27278
472		H	-7.81904	-0.5735	-0.987146
473		C	3.37901	-0.378915	0.002384
474		C	1.79064	-2.22455	0.084208
475		C	3.09404	-1.77079	-0.608257
476		F	4.13635	-0.555556	1.1161
477		F	4.0978	0.395613	-0.839549
478		F	4.0958	-2.63693	-0.447043
479		F	2.85005	-1.62037	-1.92204
480		F	1.08273	-3.07745	-0.67589
481		F	2.11421	-2.86447	1.22994
482		S	-1.63228	-1.74334	0.359138
483		H	-1.22154	3.24182	0.14758
484		N	-2.05423	0.865997	0.510328
485
486	Transition state of I2
487		C	1.12782	-0.916313	0.443224
488		C	1.98194	0.189922	0.380096
489		C	-0.228145	-0.823114	0.703627
490		C	1.44457	1.4948	0.265245
491		C	-2.6225	-0.42588	0.359634
492		C	0.643959	3.71331	-0.5058
493		N	0.21353	1.7861	0.673716
494		C	-0.791317	0.316609	1.3965
495		C	-0.38743	0.592874	2.81549
496		H	-0.712858	1.59528	3.11466
497		H	-0.883548	-0.143903	3.46192
498		H	0.694968	0.50208	2.9519
499		C	-0.25162	2.98655	0.20743
500		S	2.13717	2.80933	-0.665981
501		C	0.503438	5.08893	-1.05347
502		H	1.19664	5.79426	-0.576379
503		H	0.695575	5.11902	-2.13387
504		H	-0.51608	5.45388	-0.883438
505		C	-4.02741	-0.463995	-0.050009
506		C	-4.89561	0.526389	0.42535
507		C	-4.52489	-1.45827	-0.898808
508		C	-6.23166	0.520779	0.05453
509		H	-4.49763	1.28902	1.09083
510		C	-5.86282	-1.46165	-1.26612
511		H	-3.86293	-2.23569	-1.28027
512		C	-6.71904	-0.472418	-0.791177
513		H	-6.89968	1.29367	0.430058
514		H	-6.23891	-2.23986	-1.92714
515		H	-7.76863	-0.476872	-1.07957
516		C	3.36505	-0.24477	0.056763
517		C	1.8766	-2.15453	0.046113
518		C	3.1577	-1.61698	-0.616801
519		F	4.13542	-0.420615	1.15848
520		F	4.02928	0.604749	-0.756877
521		F	4.20079	-2.43752	-0.481715
522		F	2.92055	-1.41911	-1.92525
523		F	1.1744	-2.94806	-0.786179
524		F	2.21395	-2.89058	1.1257
525		S	-1.50569	-1.68639	-0.152198
526		H	-1.25899	3.29524	0.477228
527		N	-2.13824	0.504408	1.12722
528
529	Closed-ring isomer of I3
530		C	0.864128	-0.898805	0.228743
531		C	1.38359	0.434885	0.406426
532		C	0.516009	1.47612	0.21034
533		C	-0.846596	3.4737	-0.434286
534		N	-0.8413	1.24453	0.148048
535		C	-1.57347	2.36301	-0.232409
536		S	0.870321	3.14896	-0.161115
537		C	-1.30842	4.82553	-0.842216
538		H	-1.04095	5.58785	-0.098116
539		H	-0.871022	5.13529	-1.80061
540		H	-2.39893	4.83232	-0.9535
541		C	2.86008	0.419303	0.332455
542		C	1.99967	-1.82562	-0.061867
543		C	3.15153	-0.877625	-0.457757
544		F	3.4637	0.316902	1.54461
545		F	3.3901	1.49947	-0.280684
546		F	4.35788	-1.38958	-0.208038
547		F	3.05193	-0.607841	-1.77155
548		F	1.72748	-2.72248	-1.02705
549		F	2.37009	-2.5124	1.04267
550		H	-2.64477	2.27458	-0.367116
551		C	-0.458997	-1.13198	0.217294
552		C	-1.37748	-0.025363	0.71811
553		C	-2.76717	-0.396497	0.255087
554		C	-2.85254	-1.68026	-0.294204
555		C	-3.94208	0.315524	0.481334
556		C	-4.07326	-2.21954	-0.686458
557		C	-5.16836	-0.209225	0.084411
558		H	-3.91158	1.27888	0.991151
559		C	-5.2284	-1.46807	-0.50781
560		H	-4.12075	-3.2171	-1.11946
561		H	-6.07998	0.360329	0.25131
562		H	-6.18796	-1.87853	-0.816402
563		S	-1.31485	-2.5505	-0.381187
564		C	-1.3417	0.064801	2.24603
565		H	-0.32182	0.249056	2.60311
566		H	-1.99404	0.875651	2.59796
567		H	-1.69656	-0.881409	2.67327
568
569	Transition state of I3
570		C	1.34069	0.389842	0.473618
571		C	-0.51598	-1.1963	0.302057
572		C	0.488596	1.50936	0.329062
573		C	-2.86169	-1.57244	-0.483747
574		C	-0.741618	3.4939	-0.511477
575		C	-0.828936	1.43361	0.517496
576		N	-1.43667	-0.331068	0.989653
577		C	-1.26123	-0.113501	2.46887
578		C	-1.8292	0.758455	2.8148
579		H	-1.62974	-1.00308	2.99769
580		H	-0.208793	0.031364	2.7328
581		H	-1.5134	2.50369	-0.001082
582		C	0.944965	3.03276	-0.412692
583		S	-1.15737	4.82308	-1.03333
584		C	-0.776998	5.64529	-0.412901
585		H	-0.796083	4.98915	-2.0565
586		H	-2.25126	4.89192	-1.0482
587		H	-4.083	-1.93412	-1.05078
588		C	-5.23109	-1.27421	-0.638429
589		C	2.82372	0.380554	0.385683
590		C	1.96068	-1.83974	-0.046604
591		C	3.12446	-0.901867	-0.415923
592		C	3.42234	0.278561	1.59793
593		F	3.34291	1.47039	-0.220741
594		F	4.32351	-1.42305	-0.150971
595		F	3.05046	-0.612457	-1.72672
596		F	1.65699	-2.68175	-1.05292
597		F	2.31962	-2.58685	1.0191
598		F	-2.79245	-0.563314	0.490589
599		C	-1.31119	-2.30027	-0.850564
600		S	-2.59809	2.52543	0.079417
601		H	-3.96359	0.073637	0.909854
602		C	-5.17754	-0.274002	0.338718
603		C	-4.13272	-2.72006	-1.80222
604		H	-6.18905	-1.54545	-1.07865
605		H	-6.09153	0.223897	0.655421
606		H	-3.91742	0.841423	1.68316
607		H
608
609	Closed-ring isomer of I4
610		C	0.751874	-0.964541	0.258722
611		C	1.28578	0.379331	0.37618
612		C	0.434825	1.42848	0.174651
613		C	-0.924777	3.46811	-0.366767
614		N	-0.93145	1.22131	0.137031
615		C	-1.66128	2.36603	-0.157793
616		S	0.800534	3.10297	-0.191061
617		C	-1.37576	4.83944	-0.716731
618		H	-1.04689	5.57706	0.027629
619		H	-0.986077	5.16154	-1.69159
620		H	-2.47036	4.87474	-0.765057
621		C	2.75984	0.339369	0.277462
622		C	1.86567	-1.91068	-0.055867
623		C	3.01606	-0.974635	-0.494594
624		F	3.38208	0.245572	1.48122
625		F	3.29416	1.40191	-0.361374
626		F	4.22316	-1.49545	-0.267206
627		F	2.88613	-0.725365	-1.81006
628		F	1.57152	-2.81142	-1.00606
629		F	2.26463	-2.58637	1.04577
630		H	-2.74193	2.29726	-0.224046
631		C	-0.571203	-1.14163	0.31933
632		C	-1.48084	-0.004802	0.749757
633		C	-2.79171	-0.513395	0.202559
634		C	-2.5894	-1.83421	-0.194843
635		C	-4.0784	0.005542	0.199019
636		C	-3.60975	-2.647	-0.65173
637		C	-5.1256	-0.786744	-0.269885
638		H	-4.28146	1.01038	0.570325
639		C	-4.88764	-2.0939	-0.692084
640		H	-3.40932	-3.66969	-0.96002
641		H	-6.13661	-0.386282	-0.294057
642		H	-5.71643	-2.70113	-1.0509
643		C	-1.5382	0.164502	2.26928
644		H	-0.547478	0.413431	2.66862
645		H	-2.24124	0.966547	2.53435
646		H	-1.88136	-0.7673	2.73545
647		O	-1.28766	-2.2436	-0.069198
648
649	Transition state of I4
650		C	0.701631	-0.944891	0.2091
651		C	1.25601	0.332825	0.392134
652		C	-0.644651	-1.17562	0.333111
653		C	0.428694	1.47312	0.296855
654		C	-2.62641	-1.69288	-0.436571
655		C	-0.75602	3.53001	-0.430103
656		N	-0.881488	1.44473	0.543525
657		C	-1.54033	-0.288648	1.02592
658		C	-1.41293	-0.036381	2.50139
659		H	-2.01749	0.827439	2.8049
660		H	-1.77274	-0.920972	3.04427
661		H	-0.372818	0.148969	2.78942
662		C	-1.54404	2.55628	0.087076
663		S	0.913936	2.99321	-0.426423
664		C	-1.13729	4.88992	-0.895479
665		H	-0.693265	5.67718	-0.272105
666		H	-0.817697	5.07009	-1.93007
667		H	-2.22673	5.00489	-0.855966
668		C	-3.66198	-2.29484	-1.13577
669		C	-4.94139	-1.80459	-0.90536
670		C	2.71644	0.312496	0.124436
671		C	1.74339	-1.8604	-0.355107
672		C	3.05916	-1.19187	0.093201
673		F	3.45781	0.971869	1.04077
674		F	3.03175	0.859739	-1.08059
675		F	3.34974	-1.60388	1.33913
676		F	4.08479	-1.47381	-0.711341
677		F	1.7067	-1.87852	-1.70582
678		F	1.6498	-3.12594	0.078828
679		C	-2.83995	-0.639103	0.460601
680		H	-2.62156	2.62141	0.223344
681		C	-4.1345	-0.177136	0.696342
682		C	-5.18245	-0.760665	-0.000993
683		H	-3.46902	-3.11129	-1.82674
684		H	-5.78001	-2.24909	-1.43832
685		H	-6.20116	-0.413376	0.157171
686		H	-4.31545	0.625951	1.41138
687		O	-1.32379	-2.04954	-0.51284

## Sheet: M05-2x
1	Table of Contents
2	Structure				Row
3	Closed-ring isomer of N1				21
4	Transition state of N1				65
5	Closed-ring isomer of N2				109
6	Transition state of N2				152
7	Closed-ring isomer of N3				195
8	Transition state of N3				235
9	Closed-ring isomer of N4				275
10	Transition state of N4				315
11	Closed-ring isomer of I1				355
12	Transition state of I1				399
13	Closed-ring isomer of I2				443
14	Transition state of I2				486
15	Closed-ring isomer of I3				529
16	Transition state of I3				569
17	Closed-ring isomer of I4				609
18	Transition state of I4				649
19
20	Structure	Atom	x	y	z
21	Closed-ring isomer of N1
22		C	0.808612	-0.955545	0.377191
23		C	2.00766	-0.170357	0.27981
24		C	-0.409277	-0.385449	0.495511
25		C	1.87915	1.17231	0.042854
26		C	-2.69492	0.019555	0.18086
27		C	1.87696	3.60715	-0.521553
28		N	0.653876	1.779	0.145012
29		C	-0.434596	1.09354	0.854245
30		C	-0.287531	1.29334	2.36253
31		H	-0.343872	2.35335	2.61696
32		H	-1.08975	0.758697	2.8715
33		H	0.67401	0.889391	2.68716
34		C	0.676876	3.1389	-0.149902
35		S	3.07575	2.31373	-0.508619
36		C	2.25048	4.99583	-0.925817
37		H	3.0312	5.39873	-0.277921
38		H	2.61628	5.02342	-1.95391
39		H	1.37764	5.64465	-0.856322
40		C	-4.1174	-0.199843	-0.100921
41		C	-5.08071	0.750761	0.255994
42		C	-4.53418	-1.37611	-0.739276
43		C	-6.4269	0.525224	-0.007518
44		H	-4.7767	1.65932	0.761048
45		C	-5.8794	-1.60099	-0.993729
46		H	-3.79653	-2.10149	-1.05704
47		C	-6.83174	-0.65126	-0.629196
48		H	-7.15968	1.2687	0.278981
49		H	-6.18449	-2.51337	-1.49003
50		H	-7.88004	-0.825883	-0.834527
51		C	3.18995	-1.03741	0.083771
52		C	1.1659	-2.39994	0.194456
53		C	2.57235	-2.35297	-0.436052
54		F	3.86975	-1.31227	1.23294
55		F	4.09318	-0.532793	-0.795332
56		F	3.3082	-3.43343	-0.138739
57		F	2.43749	-2.26128	-1.77674
58		F	0.294954	-3.08411	-0.582368
59		F	1.25139	-3.04984	1.38399
60		H	-0.238257	3.70632	-0.077921
61		S	-2.08701	1.6887	0.290078
62		C	-1.73114	-0.918507	0.318552
63		H	-1.92214	-1.97945	0.248914
64
65	Transition state of N1
66		C	0.94453	-0.933666	0.486463
67		C	1.98909	-0.029093	0.317941
68		C	-0.361619	-0.553833	0.806193
69		C	1.71751	1.3578	0.167782
70		C	-2.65525	-0.247291	0.417425
71		C	1.31035	3.63896	-0.691471
72		N	0.624049	1.9169	0.667933
73		C	-0.546286	0.674277	1.54402
74		C	0.090224	0.86899	2.90026
75		H	0.007731	1.90763	3.22077
76		H	-0.421869	0.229021	3.62011
77		H	1.14273	0.591103	2.86282
78		C	0.363334	3.16361	0.152209
79		S	2.55303	2.43766	-0.916732
80		C	1.3901	4.98536	-1.33794
81		H	2.25753	5.54552	-0.984569
82		H	1.46186	4.89823	-2.42328
83		H	0.493206	5.55624	-1.099
84		C	-4.00623	-0.390527	-0.129179
85		C	-4.49004	-1.66058	-0.472263
86		C	-4.83959	0.717801	-0.320969
87		C	-5.75981	-1.81114	-1.01167
88		H	-3.87142	-2.53099	-0.294454
89		C	-6.11421	0.56197	-0.852665
90		H	-4.48162	1.70884	-0.068922
91		C	-6.5793	-0.701097	-1.20425
92		H	-6.11601	-2.80023	-1.27044
93		H	-6.74266	1.43173	-0.996707
94		H	-7.57224	-0.82162	-1.61773
95		C	3.24195	-0.724162	-0.078524
96		C	1.41186	-2.31563	0.115277
97		C	2.74892	-2.08263	-0.610475
98		F	4.08767	-0.94137	0.964306
99		F	3.94975	-0.056783	-1.02695
100		F	3.62722	-3.07535	-0.410057
101		F	2.50853	-1.96065	-1.93319
102		F	0.538528	-2.98175	-0.676857
103		F	1.62923	-3.07815	1.21433
104		H	-0.519778	3.69287	0.480388
105		S	-2.24833	1.13139	1.45516
106		H	-1.60205	-1.9148	-0.420978
107		C	-1.58006	-1.04749	0.221398
108
109	Closed-ring isomer of N2
110		C	0.687467	-0.945094	0.351633
111		C	1.94295	-0.251917	0.27061
112		C	-0.472029	-0.272841	0.492438
113		C	1.92628	1.09843	0.048033
114		C	-2.61101	0.183187	0.17588
115		C	2.12709	3.53121	-0.491915
116		N	0.752741	1.80256	0.145319
117		C	-0.383392	1.20962	0.85669
118		C	-0.229257	1.40741	2.36429
119		H	-0.22397	2.46963	2.61565
120		H	-1.0594	0.921457	2.87728
121		H	0.707674	0.95042	2.69029
122		C	0.889115	3.15946	-0.136575
123		S	3.21784	2.14506	-0.476848
124		C	2.61663	4.88794	-0.880519
125		H	3.42173	5.21951	-0.222148
126		H	2.99309	4.89373	-1.90505
127		H	1.79957	5.60583	-0.812365
128		C	-4.0316	-0.057804	-0.091783
129		C	-4.9618	0.984501	-0.11581
130		C	-4.45519	-1.37094	-0.33375
131		C	-6.29966	0.718916	-0.383358
132		H	-4.64832	2.0017	0.085869
133		C	-5.79194	-1.62971	-0.595687
134		H	-3.72135	-2.16503	-0.31556
135		C	-6.71691	-0.586534	-0.622624
136		H	-7.01514	1.53074	-0.399767
137		H	-6.11472	-2.64565	-0.783067
138		H	-7.75947	-0.79215	-0.829222
139		C	3.05949	-1.20669	0.095808
140		C	0.927953	-2.41337	0.142501
141		C	2.35484	-2.4665	-0.447604
142		F	3.68663	-1.53585	1.26008
143		F	4.01959	-0.765638	-0.756871
144		F	2.99762	-3.60144	-0.137708
145		F	2.2672	-2.35658	-1.79081
146		F	0.042085	-3.01085	-0.675844
147		F	0.930656	-3.08459	1.32232
148		H	0.021227	3.79736	-0.067595
149		N	-1.74744	-0.755053	0.314144
150		S	-1.99322	1.86737	0.268681
151
152	Transition state of N2
153		C	0.8255	-0.903618	0.522772
154		C	1.93492	-0.087647	0.334079
155		C	-0.439634	-0.401282	0.836686
156		C	1.77693	1.31114	0.128447
157		C	-2.58814	-0.068538	0.419442
158		C	1.56225	3.57619	-0.837322
159		N	0.732452	1.98145	0.596034
160		C	-0.53195	0.866833	1.52232
161		C	0.111324	1.08238	2.87148
162		H	0.123107	2.13995	3.13342
163		H	-0.45954	0.531363	3.62028
164		H	1.1342	0.708121	2.8586
165		C	0.576713	3.22042	0.021191
166		S	2.70233	2.26837	-0.996839
167		C	1.75451	4.87965	-1.54525
168		H	2.66452	5.38214	-1.21296
169		H	1.82148	4.73545	-2.62475
170		H	0.90727	5.53315	-1.33924
171		C	-3.92674	-0.279314	-0.138448
172		C	-4.16948	-1.44161	-0.881151
173		C	-4.95926	0.642123	0.052575
174		C	-5.42678	-1.67143	-1.41958
175		H	-3.36033	-2.14509	-1.02271
176		C	-6.21633	0.407819	-0.492663
177		H	-4.7886	1.5443	0.628469
178		C	-6.45403	-0.748378	-1.22881
179		H	-5.60689	-2.57221	-1.99223
180		H	-7.00967	1.128	-0.33932
181		H	-7.4338	-0.930611	-1.65144
182		C	3.13566	-0.892804	-0.016489
183		C	1.17851	-2.33292	0.196844
184		C	2.54558	-2.22756	-0.507074
185		F	3.94518	-1.13189	1.04944
186		F	3.90627	-0.316374	-0.975445
187		F	3.34186	-3.2754	-0.251263
188		F	2.34255	-2.13663	-1.83826
189		F	0.278872	-2.95376	-0.586894
190		F	1.32341	-3.06514	1.33007
191		H	-0.258534	3.83725	0.320325
192		S	-2.20258	1.4026	1.36542
193		N	-1.60528	-0.881924	0.281274
194
195	Closed-ring isomer of N3
196		C	-0.118892	-0.844046	0.206521
197		C	1.27547	-0.496583	0.286291
198		C	-1.09269	0.087314	0.256595
199		C	1.62787	0.81173	0.100341
200		C	-3.09801	1.27472	-0.20341
201		C	2.49508	3.11032	-0.349206
202		N	0.664575	1.78277	0.062681
203		C	-0.665879	1.50614	0.618552
204		C	-0.651515	1.70377	2.13456
205		H	-0.382992	2.73128	2.38635
206		H	-1.64186	1.48448	2.53442
207		H	0.073222	1.01684	2.57801
208		C	1.16766	3.06031	-0.166619
209		S	-1.93167	2.6065	-0.161268
210		S	3.19631	1.497	-0.223484
211		C	-2.53156	0.012994	0.042953
212		C	3.35209	4.29935	-0.63762
213		H	4.11954	4.4267	0.128167
214		H	3.85061	4.20272	-1.60382
215		H	2.73593	5.19793	-0.659255
216		C	2.13443	-1.69642	0.272563
217		C	-0.218174	-2.32697	-0.033177
218		C	1.22743	-2.76364	-0.369296
219		F	2.49186	-2.12953	1.51592
220		F	3.28558	-1.53426	-0.429274
221		F	1.49246	-4.00697	0.056889
222		F	1.39006	-2.70849	-1.7078
223		F	-1.05106	-2.66165	-1.04397
224		F	-0.637604	-2.99201	1.07462
225		H	0.485767	3.89661	-0.191825
226		C	-4.45236	1.42677	-0.464426
227		C	-3.36248	-1.11003	0.059737
228		H	-2.95379	-2.08477	0.281838
229		H	-4.87102	2.40674	-0.653723
230		C	-4.72022	-0.962947	-0.196403
231		C	-5.26154	0.293913	-0.464556
232		H	-5.36252	-1.83356	-0.179537
233		H	-6.32097	0.395725	-0.661236
234
235	Transition state of N3
236		C	0.167375	-0.859833	0.340081
237		C	1.31865	-0.077797	0.309087
238		C	-1.10978	-0.33833	0.559858
239		C	1.22586	1.33217	0.142679
240		C	-3.34302	0.308111	0.080094
241		C	1.21531	3.64127	-0.725661
242		N	0.167599	2.02347	0.529512
243		C	-1.19053	0.880122	1.32067
244		C	-0.599611	0.983579	2.70703
245		H	-0.57434	2.02132	3.03899
246		H	-1.22584	0.404386	3.38743
247		H	0.411026	0.579613	2.72277
248		C	0.128666	3.29339	0.007032
249		S	-2.80369	1.58769	1.16943
250		S	2.30565	2.28537	-0.832379
251		C	-2.36037	-0.679217	-0.108002
252		C	1.53628	4.96416	-1.34522
253		H	2.42785	5.40716	-0.898165
254		H	1.70717	4.86659	-2.41848
255		H	0.701148	5.64729	-1.19261
256		C	2.53247	-0.883065	0.021255
257		C	0.538241	-2.25611	-0.084989
258		C	2.04856	-2.3327	0.195199
259		F	3.57887	-0.613852	0.841813
260		F	2.99252	-0.708291	-1.25229
261		F	2.2349	-2.7141	1.47575
262		F	2.67933	-3.19081	-0.618615
263		F	0.349421	-2.44226	-1.42043
264		F	-0.139934	-3.2259	0.561999
265		H	-0.706652	3.93559	0.246345
266		C	-2.67565	-1.77758	-0.916093
267		C	-4.59276	0.241194	-0.519035
268		H	-1.95034	-2.55759	-1.09013
269		H	-5.3229	1.02525	-0.363842
270		C	-3.93392	-1.86492	-1.49746
271		C	-4.88823	-0.863996	-1.3093
272		H	-4.17184	-2.72298	-2.11275
273		H	-5.8609	-0.945615	-1.77634
274
275	Closed-ring isomer of N4
276		C	-0.042187	-0.887571	0.316061
277		C	1.25354	-0.256034	0.352171
278		C	-1.17154	-0.15712	0.380962
279		C	1.3143	1.0958	0.127606
280		C	-3.09875	0.981437	-0.04401
281		C	1.62897	3.51586	-0.428193
282		N	0.173201	1.84863	0.159113
283		C	-1.02748	1.2997	0.785055
284		C	-0.990269	1.50188	2.2924
285		H	-0.946287	2.56737	2.52437
286		H	-1.89192	1.07086	2.72877
287		H	-0.115562	0.998531	2.70648
288		C	0.359886	3.19412	-0.135529
289		S	2.66816	2.09207	-0.334003
290		C	-2.57352	-0.315731	0.040787
291		C	2.33188	-1.25877	0.224595
292		C	0.152104	-2.35561	0.073389
293		C	1.61165	-2.46387	-0.414365
294		F	2.85664	-1.66101	1.417
295		F	3.37262	-0.840913	-0.541226
296		F	2.17208	-3.64082	-0.100519
297		F	1.62689	-2.30721	-1.75554
298		F	-0.704429	-2.87981	-0.833315
299		F	0.024264	-3.072	1.21902
300		C	-4.40582	1.23943	-0.405697
301		C	-3.39217	-1.40358	-0.253356
302		H	-3.00252	-2.41025	-0.208467
303		H	-4.7749	2.2539	-0.463334
304		C	-4.71748	-1.16434	-0.607903
305		C	-5.21512	0.137081	-0.68514
306		H	-5.36825	-1.99966	-0.829839
307		H	-0.498518	3.84679	-0.122644
308		C	2.18978	4.84799	-0.806161
309		H	2.96769	5.16085	-0.107174
310		H	2.62339	4.82559	-1.80763
311		H	1.39636	5.5949	-0.793498
312		H	-6.2482	0.298695	-0.964563
313		O	-2.17795	1.96135	0.255375
314
315	Transition state of N4
316		C	0.126977	-0.871835	0.384614
317		C	1.23306	-0.026601	0.360289
318		C	-1.16661	-0.438169	0.633111
319		C	1.04564	1.37833	0.219334
320		C	-3.26882	0.339153	0.282405
321		C	0.905943	3.70889	-0.586109
322		N	-0.063172	1.99161	0.601097
323		C	-1.37896	0.776755	1.37143
324		C	-0.911801	0.993188	2.77775
325		H	-1.00028	2.04395	3.04908
326		H	-1.54326	0.392907	3.43598
327		H	0.122883	0.672725	2.88056
328		C	-0.168555	3.27295	0.115882
329		S	2.08064	2.42614	-0.707182
330		C	-2.42609	-0.731924	-0.026975
331		C	2.47299	-0.760077	-0.001517
332		C	0.534293	-2.22552	-0.122227
333		C	2.05957	-2.24337	0.078848
334		F	3.52643	-0.505226	0.815393
335		F	2.90013	-0.479863	-1.26801
336		F	2.32736	-2.7138	1.31455
337		F	2.68938	-3.00168	-0.829824
338		F	0.266212	-2.3552	-1.45
339		F	-0.070231	-3.25036	0.51327
340		C	-2.89411	-1.72708	-0.883427
341		C	-4.548	0.483904	-0.207815
342		H	-2.26465	-2.56223	-1.15702
343		H	-5.15827	1.33562	0.058811
344		C	-4.19193	-1.61623	-1.37695
345		C	-5.00775	-0.530836	-1.04902
346		H	-4.57423	-2.38692	-2.03355
347		H	-1.04513	3.85578	0.358808
348		C	1.15339	5.06455	-1.16738
349		H	1.336	5.00692	-2.24165
350		H	0.279261	5.69403	-1.00258
351		H	2.01513	5.54611	-0.702016
352		O	-2.64668	1.2242	1.1549
353		H	-6.01092	-0.47347	-1.45026
354
355	Closed-ring isomer of I1
356		C	1.0111	-0.934258	0.36227
357		C	2.03662	0.084101	0.336123
358		C	-0.282284	-0.612489	0.496561
359		C	1.63791	1.37453	0.117376
360		C	-2.72235	-0.123289	0.219378
361		C	1.12793	3.74684	-0.484265
362		N	0.313362	1.71308	0.212638
363		C	-0.624447	0.81065	0.920929
364		C	-0.442339	0.990313	2.43618
365		H	-0.706821	2.00905	2.72921
366		H	-1.09146	0.286535	2.95864
367		H	0.594259	0.792664	2.71364
368		C	0.050011	3.03713	-0.119418
369		S	2.57562	2.74221	-0.427497
370		C	1.20198	5.17794	-0.906401
371		H	1.86423	5.74862	-0.252458
372		H	1.57417	5.27102	-1.92836
373		H	0.20886	5.62494	-0.862915
374		C	-4.1612	-0.252282	-0.069521
375		C	-5.08336	0.580503	0.572909
376		C	-4.62308	-1.19829	-0.989645
377		C	-6.43848	0.48266	0.284262
378		H	-4.73517	1.28558	1.31712
379		C	-5.9802	-1.29598	-1.27377
380		H	-3.91593	-1.84373	-1.49602
381		C	-6.89044	-0.455128	-0.640603
382		H	-7.14334	1.12945	0.790868
383		H	-6.32513	-2.02836	-1.99217
384		H	-7.9473	-0.534798	-0.860496
385		C	3.3637	-0.525886	0.107995
386		C	1.64648	-2.26199	0.079777
387		C	3.01698	-1.89241	-0.520882
388		F	4.07403	-0.754499	1.24952
389		F	4.16317	0.20452	-0.711596
390		F	3.94938	-2.82911	-0.295485
391		F	2.86877	-1.72352	-1.85286
392		F	0.923596	-3.03725	-0.757866
393		F	1.85549	-2.9686	1.21993
394		C	-2.06276	1.00268	0.521529
395		S	-1.71607	-1.58788	0.209413
396		H	-2.5598	1.96123	0.588381
397		H	-0.963467	3.40092	-0.07399
398
399	Transition state of I1
400		C	1.06706	-0.919473	0.461957
401		C	2.00341	0.122007	0.434892
402		C	-0.277446	-0.717037	0.69653
403		C	1.55905	1.45987	0.294559
404		C	-2.70529	-0.269879	0.35451
405		C	0.928873	3.7008	-0.549109
406		N	0.350673	1.84831	0.687467
407		C	-0.719941	0.454913	1.41901
408		C	-0.226898	0.667391	2.83365
409		H	-0.450765	1.68145	3.16619
410		H	-0.740638	-0.043942	3.48377
411		H	0.84605	0.496531	2.90543
412		C	-0.025022	3.06682	0.171095
413		S	2.34686	2.69083	-0.662372
414		C	0.888908	5.07078	-1.14778
415		H	1.62611	5.72919	-0.684792
416		H	1.08937	5.0392	-2.22003
417		H	-0.099553	5.50441	-0.997414
418		C	-4.11876	-0.34015	-0.049767
419		C	-5.11585	0.161584	0.794002
420		C	-4.48639	-0.900158	-1.2777
421		C	-6.44989	0.117153	0.410098
422		H	-4.84307	0.561692	1.7621
423		C	-5.82236	-0.946679	-1.65708
424		H	-3.72166	-1.28077	-1.94359
425		C	-6.80725	-0.43629	-0.816633
426		H	-7.21224	0.503806	1.07426
427		H	-6.09267	-1.37859	-2.61199
428		H	-7.84766	-0.474566	-1.11274
429		C	3.35289	-0.399415	0.09789
430		C	1.72159	-2.20085	0.02648
431		C	3.06033	-1.75106	-0.582263
432		F	4.13628	-0.622657	1.1886
433		F	4.05606	0.416865	-0.729956
434		F	4.03868	-2.65143	-0.409096
435		F	2.88503	-1.53304	-1.90327
436		F	0.974081	-2.89059	-0.867004
437		F	1.96543	-3.02058	1.07749
438		C	-2.13502	0.66994	1.15023
439		S	-1.59502	-1.5145	-0.164353
440		H	-2.6876	1.49292	1.5836
441		H	-1.00191	3.46057	0.412201
442
443	Closed-ring isomer of I2
444		C	1.07783	-0.9413	0.356542
445		C	2.01995	0.150977	0.3034
446		C	-0.230179	-0.718728	0.534083
447		C	1.51612	1.41299	0.125479
448		C	-2.63096	-0.258641	0.254843
449		C	0.801725	3.75642	-0.382781
450		N	0.177565	1.64954	0.270109
451		C	-0.688656	0.669464	0.949682
452		C	-0.597016	0.862345	2.46519
453		H	-0.966082	1.85332	2.73402
454		H	-1.20418	0.103122	2.96007
455		H	0.441028	0.754829	2.78331
456		C	-0.206744	2.95739	-0.003706
457		S	2.32319	2.86266	-0.410145
458		C	0.755089	5.20079	-0.761528
459		H	1.39499	5.80087	-0.111722
460		H	1.08292	5.35167	-1.79177
461		H	-0.266813	5.56836	-0.670845
462		C	-4.06189	-0.372737	-0.081628
463		C	-4.89915	0.721152	0.159423
464		C	-4.58941	-1.54073	-0.635414
465		C	-6.24901	0.643428	-0.15143
466		H	-4.47415	1.6158	0.59311
467		C	-5.94292	-1.61451	-0.943809
468		H	-3.94615	-2.38706	-0.842524
469		C	-6.77325	-0.524546	-0.702412
470		H	-6.89474	1.49088	0.039067
471		H	-6.34613	-2.52106	-1.37556
472		H	-7.82717	-0.584345	-0.942234
473		C	3.38251	-0.352643	0.032098
474		C	1.8064	-2.21853	0.063208
475		C	3.12495	-1.74617	-0.580828
476		F	4.1473	-0.518245	1.14933
477		F	4.09353	0.434711	-0.815489
478		F	4.13345	-2.60612	-0.379129
479		F	2.92353	-1.59919	-1.90819
480		F	1.12016	-3.05291	-0.747133
481		F	2.10316	-2.89602	1.20094
482		S	-1.63107	-1.74582	0.313941
483		H	-1.24961	3.21175	0.09527
484		N	-2.06334	0.849552	0.524693
485
486	Transition state of I2
487		C	1.12871	-0.918822	0.443241
488		C	1.97561	0.190927	0.412745
489		C	-0.229468	-0.830177	0.685244
490		C	1.4293	1.49651	0.289626
491		C	-2.61893	-0.437107	0.364123
492		C	0.623588	3.69143	-0.517174
493		N	0.199768	1.78401	0.692697
494		C	-0.784605	0.292527	1.40359
495		C	-0.358315	0.548852	2.82574
496		H	-0.675597	1.54354	3.13449
497		H	-0.843976	-0.196123	3.4599
498		H	0.721234	0.454494	2.92953
499		C	-0.274204	2.97611	0.201797
500		S	2.11382	2.79545	-0.653487
501		C	0.473693	5.06169	-1.09754
502		H	1.16073	5.76936	-0.630121
503		H	0.668012	5.05983	-2.17138
504		H	-0.544331	5.41466	-0.934701
505		C	-4.03257	-0.469932	-0.041859
506		C	-4.90079	0.501285	0.467818
507		C	-4.52225	-1.44211	-0.918247
508		C	-6.23922	0.498158	0.100894
509		H	-4.50698	1.24193	1.14976
510		C	-5.8628	-1.442	-1.28128
511		H	-3.86066	-2.1989	-1.32244
512		C	-6.72324	-0.472504	-0.773396
513		H	-6.90702	1.25103	0.499275
514		H	-6.23465	-2.19792	-1.96044
515		H	-7.76793	-0.474462	-1.05696
516		C	3.36424	-0.221264	0.080433
517		C	1.87983	-2.14756	0.013119
518		C	3.18452	-1.5982	-0.58932
519		F	4.16083	-0.369751	1.17343
520		F	3.99704	0.644446	-0.753318
521		F	4.22879	-2.41659	-0.397153
522		F	3.00525	-1.40773	-1.91366
523		F	1.18682	-2.8867	-0.885604
524		F	2.17551	-2.9502	1.06305
525		S	-1.50193	-1.6677	-0.187344
526		H	-1.27848	3.28018	0.458712
527		N	-2.14082	0.476017	1.15011
528
529	Closed-ring isomer of I3
530		C	0.859182	-0.908977	0.235207
531		C	1.37443	0.425634	0.44318
532		C	0.509883	1.46518	0.227887
533		C	-0.844065	3.44571	-0.463174
534		N	-0.840597	1.23115	0.153847
535		C	-1.57445	2.33959	-0.258717
536		S	0.862062	3.13066	-0.158337
537		C	-1.30803	4.79605	-0.903114
538		H	-1.05518	5.55954	-0.164746
539		H	-0.853041	5.08162	-1.8533
540		H	-2.39038	4.78814	-1.03096
541		C	2.85118	0.421837	0.361946
542		C	2.00161	-1.82372	-0.083855
543		C	3.15401	-0.863471	-0.437904
544		F	3.47209	0.32166	1.57152
545		F	3.36425	1.51673	-0.255369
546		F	4.36064	-1.38151	-0.166446
547		F	3.08026	-0.572916	-1.75483
548		F	1.73518	-2.68263	-1.09316
549		F	2.37212	-2.55828	0.995897
550		H	-2.63596	2.24384	-0.408376
551		C	-0.46096	-1.14034	0.205822
552		C	-1.36949	-0.031749	0.72825
553		C	-2.76901	-0.398321	0.280073
554		C	-2.85978	-1.66569	-0.302774
555		C	-3.93744	0.312056	0.54274
556		C	-4.08686	-2.19368	-0.691844
557		C	-5.16988	-0.202327	0.149892
558		H	-3.89506	1.25807	1.06951
559		C	-5.23878	-1.44592	-0.474591
560		H	-4.14233	-3.1731	-1.14892
561		H	-6.07413	0.359178	0.3433
562		H	-6.19787	-1.84569	-0.777621
563		S	-1.32407	-2.52857	-0.440935
564		C	-1.30709	0.050373	2.26055
565		H	-0.282654	0.227181	2.58824
566		H	-1.946	0.861059	2.61753
567		H	-1.65879	-0.892374	2.68081
568
569	Transition state of I3
570		C	0.82961	-0.909651	0.292495
571		C	1.33182	0.379638	0.490389
572		C	-0.525237	-1.19185	0.27996
573		C	0.483218	1.50769	0.340927
574		C	-2.87189	-1.55358	-0.48962
575		C	-0.724873	3.48671	-0.520798
576		N	-0.829639	1.44243	0.53313
577		C	-1.43033	-0.337348	0.991491
578		C	-1.23131	-0.131158	2.47549
579		H	-1.79039	0.736352	2.82547
580		H	-1.59095	-1.02255	2.99394
581		H	-0.177862	0.011213	2.70959
582		C	-1.50897	2.51314	-0.000801
583		S	0.948408	3.01186	-0.415293
584		C	-1.13298	4.81653	-1.0703
585		H	-0.745974	5.63482	-0.460457
586		H	-0.767115	4.95138	-2.08948
587		H	-2.22047	4.88501	-1.0854
588		C	-4.09809	-1.90643	-1.05399
589		C	-5.2433	-1.25815	-0.615431
590		C	2.81637	0.378198	0.403196
591		C	1.94856	-1.84365	-0.07463
592		C	3.13377	-0.911128	-0.379069
593		F	3.42554	0.312287	1.61803
594		F	3.32102	1.46733	-0.232189
595		F	4.31622	-1.44886	-0.047477
596		F	3.13062	-0.619842	-1.69711
597		F	1.64549	-2.62498	-1.13753
598		F	2.27757	-2.66028	0.955103
599		C	-2.7974	-0.565424	0.503604
600		S	-1.32341	-2.26434	-0.887479
601		H	-2.58614	2.54202	0.077438
602		C	-3.96407	0.062386	0.949235
603		C	-5.18268	-0.277816	0.382776
604		H	-4.15363	-2.6714	-1.81748
605		H	-6.19972	-1.52103	-1.04906
606		H	-6.09019	0.207584	0.71649
607		H	-3.91145	0.809514	1.73236
608
609	Closed-ring isomer of I4
610		C	0.746802	-0.97347	0.253301
611		C	1.27907	0.37102	0.404698
612		C	0.431664	1.41925	0.19096
613		C	-0.91661	3.4467	-0.392743
614		N	-0.928935	1.21039	0.138138
615		C	-1.65845	2.34943	-0.187739
616		S	0.798489	3.08842	-0.178696
617		C	-1.36905	4.81886	-0.772005
618		H	-1.05785	5.55567	-0.028851
619		H	-0.95788	5.11925	-1.73757
620		H	-2.45653	4.8407	-0.841975
621		C	2.75404	0.338725	0.307278
622		C	1.86338	-1.91034	-0.091335
623		C	3.02349	-0.964833	-0.47402
624		F	3.38528	0.244108	1.5125
625		F	3.27965	1.41447	-0.331456
626		F	4.22661	-1.4961	-0.212879
627		F	2.93465	-0.69242	-1.7942
628		F	1.57378	-2.76273	-1.09537
629		F	2.24949	-2.64758	0.981308
630		H	-2.72954	2.27641	-0.27902
631		C	-0.573994	-1.14863	0.29905
632		C	-1.47317	-0.009698	0.757354
633		C	-2.79911	-0.509626	0.227026
634		C	-2.60651	-1.81828	-0.212131
635		C	-4.08487	0.011756	0.26427
636		C	-3.63618	-2.617	-0.673533
637		C	-5.14234	-0.766538	-0.206917
638		H	-4.27713	0.999286	0.665787
639		C	-4.91429	-2.06114	-0.672749
640		H	-3.44457	-3.62507	-1.01289
641		H	-6.14766	-0.367449	-0.198696
642		H	-5.74619	-2.65353	-1.03099
643		C	-1.49146	0.149717	2.28335
644		H	-0.488913	0.380903	2.6454
645		H	-2.17211	0.957281	2.56242
646		H	-1.83358	-0.777662	2.7435
647		O	-1.3001	-2.23579	-0.119852
648
649	Transition state of I4
650		C	0.695887	-0.949527	0.176551
651		C	1.24266	0.322574	0.401453
652		C	-0.653047	-1.17596	0.284266
653		C	0.416663	1.47047	0.305591
654		C	-2.65552	-1.67017	-0.455328
655		C	-0.749799	3.51981	-0.447137
656		N	-0.889421	1.44947	0.552004
657		C	-1.52725	-0.307684	1.01925
658		C	-1.34846	-0.08255	2.49991
659		H	-1.93475	0.775042	2.83014
660		H	-1.69104	-0.974677	3.02817
661		H	-0.300964	0.092441	2.73999
662		C	-1.54842	2.56019	0.076215
663		S	0.907402	2.97431	-0.430491
664		C	-1.12665	4.88047	-0.939977
665		H	-0.682588	5.66416	-0.323622
666		H	-0.798236	5.03219	-1.9695
667		H	-2.21029	4.99135	-0.906938
668		C	-3.70701	-2.25266	-1.14915
669		C	-4.9805	-1.77131	-0.871957
670		C	2.7136	0.311824	0.185956
671		C	1.75027	-1.85452	-0.390924
672		C	3.0609	-1.18592	0.065313
673		F	3.42705	0.895122	1.1823
674		F	3.08062	0.949466	-0.965009
675		F	3.38784	-1.66356	1.2843
676		F	4.07435	-1.40885	-0.783692
677		F	1.71967	-1.87047	-1.74701
678		F	1.66715	-3.12808	0.042019
679		C	-2.84706	-0.646221	0.478506
680		H	-2.61918	2.62955	0.20355
681		C	-4.13548	-0.190779	0.759421
682		C	-5.19965	-0.754926	0.070235
683		H	-3.53108	-3.04243	-1.86573
684		H	-5.82737	-2.19767	-1.39421
685		H	-6.20872	-0.41582	0.262533
686		H	-4.29875	0.5851	1.49784
687		O	-1.3508	-2.02196	-0.575463

## Sheet: M06-2x
1	Table of Contents
2	Structure				Row
3	Closed-ring isomer of N1				21
4	Transition state of N1				65
5	Closed-ring isomer of N2				109
6	Transition state of N2				152
7	Closed-ring isomer of N3				195
8	Transition state of N3				235
9	Closed-ring isomer of N4				275
10	Transition state of N4				315
11	Closed-ring isomer of I1				355
12	Transition state of I1				399
13	Closed-ring isomer of I2				443
14	Transition state of I2				486
15	Closed-ring isomer of I3				529
16	Transition state of I3				569
17	Closed-ring isomer of I4				609
18	Transition state of I4				649
19
20	Structure	Atom	x	y	z
21	Closed-ring isomer of N1
22		C	0.809654	-0.954367	0.394462
23		C	2.01023	-0.170539	0.293447
24		C	-0.408141	-0.383252	0.516657
25		C	1.88122	1.17156	0.052035
26		C	-2.69483	0.021052	0.187836
27		C	1.87784	3.60552	-0.529685
28		N	0.657501	1.78317	0.163042
29		C	-0.434259	1.09839	0.872994
30		C	-0.283127	1.30537	2.3814
31		H	-0.338507	2.36875	2.6337
32		H	-1.0833	0.772404	2.90086
33		H	0.682561	0.903867	2.70673
34		C	0.680318	3.1412	-0.143835
35		S	3.07565	2.3086	-0.518244
36		C	2.25071	4.9904	-0.946076
37		H	3.04004	5.39857	-0.30718
38		H	2.60922	5.01271	-1.97985
39		H	1.3788	5.64481	-0.873672
40		C	-4.11634	-0.199159	-0.102578
41		C	-5.08218	0.758916	0.231089
42		C	-4.53192	-1.38544	-0.7256
43		C	-6.42748	0.531949	-0.039474
44		H	-4.7795	1.67821	0.724436
45		C	-5.8761	-1.61183	-0.987763
46		H	-3.79128	-2.1202	-1.0256
47		C	-6.83008	-0.654048	-0.645913
48		H	-7.16282	1.2836	0.229839
49		H	-6.17989	-2.53406	-1.473
50		H	-7.87989	-0.830395	-0.857521
51		C	3.19349	-1.03722	0.077385
52		C	1.16092	-2.40169	0.197965
53		C	2.57007	-2.35713	-0.439132
54		F	3.88959	-1.31193	1.21151
55		F	4.07904	-0.528199	-0.812089
56		F	3.30374	-3.43467	-0.137481
57		F	2.43458	-2.27339	-1.77653
58		F	0.286117	-3.07178	-0.581526
59		F	1.24478	-3.06179	1.3775
60		H	-0.236983	3.71094	-0.066979
61		S	-2.08826	1.69254	0.305649
62		C	-1.72991	-0.915363	0.331129
63		H	-1.92034	-1.97967	0.257955
64
65	Transition state of N1
66		C	0.951264	-0.929149	0.500486
67		C	1.99316	-0.023271	0.320898
68		C	-0.356124	-0.551042	0.823028
69		C	1.71478	1.36239	0.16683
70		C	-2.65169	-0.253333	0.426247
71		C	1.28932	3.64061	-0.699169
72		N	0.620974	1.91877	0.671749
73		C	-0.545621	0.682959	1.55163
74		C	0.091392	0.88952	2.90707
75		H	0.00854	1.93267	3.2225
76		H	-0.417442	0.25335	3.63655
77		H	1.14779	0.613558	2.8714
78		C	0.350423	3.16316	0.152451
79		S	2.53789	2.44378	-0.929174
80		C	1.35849	4.98476	-1.35104
81		H	2.22756	5.55305	-1.0061
82		H	1.4242	4.89545	-2.43941
83		H	0.458999	5.55556	-1.10894
84		C	-4.00021	-0.401153	-0.126976
85		C	-4.47068	-1.67031	-0.496117
86		C	-4.84662	0.701509	-0.301081
87		C	-5.73816	-1.82475	-1.04136
88		H	-3.8411	-2.5401	-0.334433
89		C	-6.11874	0.542251	-0.839576
90		H	-4.4999	1.69444	-0.027447
91		C	-6.56969	-0.71962	-1.21583
92		H	-6.08365	-2.81539	-1.32046
93		H	-6.75785	1.41022	-0.969092
94		H	-7.5629	-0.84348	-1.63533
95		C	3.24717	-0.714277	-0.091124
96		C	1.41448	-2.31484	0.127121
97		C	2.75686	-2.08803	-0.601077
98		F	4.11218	-0.909685	0.934631
99		F	3.92841	-0.053281	-1.0586
100		F	3.63619	-3.07091	-0.375833
101		F	2.52392	-1.99515	-1.9237
102		F	0.539592	-2.97228	-0.665511
103		F	1.62561	-3.07965	1.22114
104		H	-0.536868	3.68898	0.486029
105		S	-2.25038	1.1358	1.45496
106		H	-1.59052	-1.92775	-0.396341
107		C	-1.57267	-1.05181	0.240457
108
109	Closed-ring isomer of N2
110		C	0.688651	-0.943613	0.371289
111		C	1.94545	-0.25286	0.284014
112		C	-0.470268	-0.269563	0.516161
113		C	1.92855	1.09727	0.05687
114		C	-2.61012	0.185245	0.18681
115		C	2.12888	3.52876	-0.503017
116		N	0.757758	1.80694	0.164875
117		C	-0.382551	1.21617	0.876856
118		C	-0.223383	1.42013	2.38461
119		H	-0.215417	2.48546	2.63448
120		H	-1.05237	0.936628	2.9073
121		H	0.716956	0.963668	2.71143
122		C	0.894081	3.16167	-0.130797
123		S	3.21744	2.13853	-0.490171
124		C	2.61779	4.88127	-0.905693
125		H	3.43316	5.21749	-0.257733
126		H	2.98498	4.88129	-1.93659
127		H	1.80255	5.60506	-0.833972
128		C	-4.0299	-0.057009	-0.092456
129		C	-4.96124	0.98514	-0.12838
130		C	-4.45224	-1.37177	-0.333953
131		C	-6.29762	0.718473	-0.406233
132		H	-4.64783	2.00613	0.07205
133		C	-5.78744	-1.63188	-0.606463
134		H	-3.7161	-2.16806	-0.306901
135		C	-6.71305	-0.588511	-0.64466
136		H	-7.01483	1.53247	-0.431744
137		H	-6.10928	-2.6513	-0.793775
138		H	-7.75667	-0.795525	-0.859949
139		C	3.06232	-1.20817	0.087491
140		C	0.92141	-2.41453	0.150035
141		C	2.34942	-2.47214	-0.449832
142		F	3.7082	-1.538	1.23618
143		F	4.00379	-0.762525	-0.778185
144		F	2.99011	-3.60402	-0.135589
145		F	2.25718	-2.37207	-1.78977
146		F	0.029951	-2.99776	-0.667703
147		F	0.92431	-3.09391	1.32054
148		H	0.024787	3.80257	-0.055377
149		N	-1.7456	-0.751191	0.330631
150		S	-1.99303	1.87423	0.286235
151
152	Transition state of N2
153		C	0.829261	-0.900727	0.534473
154		C	1.93909	-0.086816	0.337661
155		C	-0.436165	-0.396618	0.850551
156		C	1.77905	1.31189	0.129702
157		C	-2.5856	-0.067585	0.424047
158		C	1.55592	3.57739	-0.8399
159		N	0.734245	1.98189	0.599429
160		C	-0.531349	0.87768	1.52727
161		C	0.113239	1.1018	2.87558
162		H	0.128188	2.16331	3.1332
163		H	-0.456608	0.555943	3.63274
164		H	1.13897	0.72587	2.86497
165		C	0.574062	3.2205	0.022507
166		S	2.69936	2.27051	-1.00204
167		C	1.74394	4.88	-1.55011
168		H	2.65541	5.38773	-1.22059
169		H	1.81052	4.73567	-2.63246
170		H	0.894204	5.53512	-1.3446
171		C	-3.92324	-0.282333	-0.13778
172		C	-4.16703	-1.45457	-0.86642
173		C	-4.95489	0.644985	0.035487
174		C	-5.42331	-1.68789	-1.40771
175		H	-3.3568	-2.16452	-0.994978
176		C	-6.21103	0.407367	-0.512378
177		H	-4.78231	1.55727	0.601091
178		C	-6.44923	-0.758621	-1.23415
179		H	-5.60431	-2.59836	-1.97035
180		H	-7.00473	1.13427	-0.372136
181		H	-7.43032	-0.944115	-1.65991
182		C	3.13951	-0.892943	-0.026267
183		C	1.17377	-2.33397	0.203529
184		C	2.54577	-2.23684	-0.502734
185		F	3.96282	-1.1222	1.02609
186		F	3.89214	-0.321449	-0.997589
187		F	3.33937	-3.27881	-0.229329
188		F	2.3476	-2.16651	-1.83218
189		F	0.271005	-2.94156	-0.582226
190		F	1.31126	-3.07156	1.32951
191		H	-0.265069	3.83627	0.325067
192		S	-2.20233	1.41399	1.36215
193		N	-1.60109	-0.881007	0.295952
194
195	Closed-ring isomer of N3
196		C	0.125405	0.838676	0.226421
197		C	-1.27338	0.506373	0.300913
198		C	1.09019	-0.102007	0.279748
199		C	-1.63654	-0.79845	0.110205
200		C	3.08578	-1.29775	-0.207751
201		C	-2.52497	-3.08925	-0.356835
202		N	-0.683077	-1.78241	0.080489
203		C	0.65357	-1.52101	0.63445
204		C	0.637447	-1.73146	2.15017
205		H	0.360807	-2.76101	2.39647
206		H	1.62966	-1.52178	2.55763
207		H	-0.085505	-1.04283	2.60106
208		C	-1.19876	-3.05367	-0.160561
209		S	1.91284	-2.62567	-0.158511
210		S	-3.21045	-1.46706	-0.23188
211		C	2.5272	-0.034545	0.053764
212		C	-3.39215	-4.26722	-0.65821
213		H	-4.17075	-4.39143	0.100825
214		H	-3.88325	-4.16221	-1.63051
215		H	-2.78583	-5.17584	-0.67889
216		C	-2.12374	1.71611	0.269417
217		C	0.247291	2.3197	-0.030882
218		C	-1.19746	2.7787	-0.365641
219		F	-2.49507	2.15517	1.50175
220		F	-3.26233	1.55932	-0.447401
221		F	-1.44526	4.01806	0.074003
222		F	-1.36001	2.74199	-1.70106
223		F	1.07665	2.62413	-1.04998
224		F	0.686099	2.99061	1.0611
225		H	-0.522368	-3.89884	-0.182205
226		C	4.43733	-1.45146	-0.486147
227		C	3.36174	1.08653	0.070285
228		H	2.95532	2.06298	0.30742
229		H	4.8523	-2.43374	-0.68829
230		C	4.71682	0.937318	-0.202815
231		C	5.2505	-0.320127	-0.48706
232		H	5.36444	1.80762	-0.186018
233		H	6.31011	-0.424542	-0.697192
234
235	Transition state of N3
236		C	0.164357	-0.855996	0.35508
237		C	1.32192	-0.082341	0.321187
238		C	-1.11092	-0.326874	0.57255
239		C	1.23632	1.32773	0.150664
240		C	-3.33931	0.323981	0.06866
241		C	1.23168	3.63554	-0.729309
242		N	0.17892	2.02486	0.53305
243		C	-1.19122	0.901805	1.31932
244		C	-0.608709	1.01547	2.7096
245		H	-0.576711	2.05817	3.03459
246		H	-1.242	0.446284	3.39613
247		H	0.40233	0.604399	2.73616
248		C	0.143426	3.29319	0.003585
249		S	-2.80092	1.61819	1.14335
250		S	2.32058	2.27556	-0.829023
251		C	-2.35981	-0.672132	-0.096148
252		C	1.55751	4.95455	-1.35404
253		H	2.45242	5.39904	-0.908265
254		H	1.73046	4.85327	-2.4295
255		H	0.72346	5.64446	-1.20603
256		C	2.53262	-0.895645	0.025956
257		C	0.520822	-2.25676	-0.077893
258		C	2.03776	-2.34811	0.186527
259		F	3.57669	-0.642239	0.848819
260		F	2.99435	-0.712324	-1.2414
261		F	2.23754	-2.75043	1.45481
262		F	2.65101	-3.19582	-0.647134
263		F	0.316742	-2.43729	-1.40792
264		F	-0.158061	-3.22045	0.571631
265		H	-0.694273	3.9389	0.240265
266		C	-2.67652	-1.78495	-0.885398
267		C	-4.58575	0.252407	-0.539009
268		H	-1.95306	-2.57623	-1.03721
269		H	-5.31514	1.04469	-0.402004
270		C	-3.93158	-1.87643	-1.47454
271		C	-4.88151	-0.865807	-1.31213
272		H	-4.17145	-2.74722	-2.07622
273		H	-5.85405	-0.950563	-1.78564
274
275	Closed-ring isomer of N4
276		C	0.042543	0.886211	0.341402
277		C	-1.25574	0.258326	0.371519
278		C	1.17107	0.154227	0.408084
279		C	-1.31706	-1.09254	0.140615
280		C	3.09079	-0.986414	-0.044837
281		C	-1.6339	-3.51092	-0.435785
282		N	-0.178125	-1.85147	0.179585
283		C	1.0292	-1.30726	0.803594
284		C	0.996131	-1.52457	2.31101
285		H	0.951863	-2.59456	2.5348
286		H	1.90027	-1.09845	2.7537
287		H	0.120716	-1.02501	2.73543
288		C	-0.366674	-3.19455	-0.12825
289		S	-2.67058	-2.08278	-0.341514
290		C	2.56941	0.312726	0.052328
291		C	-2.33387	1.26324	0.220812
292		C	-0.140899	2.35507	0.080565
293		C	-1.60233	2.46961	-0.416165
294		F	-2.87647	1.67034	1.3984
295		F	-3.35853	0.840608	-0.557886
296		F	-2.15791	3.64529	-0.100473
297		F	-1.61362	2.31915	-1.75436
298		F	0.722301	2.85607	-0.828266
299		F	-0.00993	3.08462	1.21287
300		C	4.39328	-1.2443	-0.426955
301		C	3.38557	1.40128	-0.248807
302		H	2.99569	2.41106	-0.19265
303		H	4.7608	-2.26184	-0.494304
304		C	4.70621	1.16138	-0.623324
305		C	5.20068	-0.141235	-0.713184
306		H	5.35722	1.9986	-0.8514
307		H	0.493267	-3.85075	-0.111324
308		C	-2.19565	-4.83809	-0.828171
309		H	-2.98373	-5.15552	-0.138296
310		H	-2.62168	-4.80908	-1.83579
311		H	-1.40439	-5.59129	-0.813837
312		H	6.23223	-0.303932	-1.0086
313		O	2.17359	-1.96403	0.263759
314
315	Transition state of N4
316		C	0.129183	-0.869027	0.405596
317		C	1.23699	-0.024917	0.376154
318		C	-1.16497	-0.434202	0.65084
319		C	1.04738	1.37872	0.228077
320		C	-3.26255	0.341992	0.270166
321		C	0.899416	3.70676	-0.592015
322		N	-0.064472	1.99202	0.605237
323		C	-1.3844	0.793299	1.3702
324		C	-0.933121	1.02614	2.78092
325		H	-1.02375	2.08222	3.04241
326		H	-1.57101	0.432257	3.44305
327		H	0.103644	0.70717	2.89956
328		C	-0.174158	3.27097	0.111441
329		S	2.08023	2.42619	-0.705665
330		C	-2.41932	-0.737169	-0.01464
331		C	2.47741	-0.75822	0.003171
332		C	0.528299	-2.22555	-0.108564
333		C	2.06167	-2.24695	0.06562
334		F	3.52886	-0.516792	0.820982
335		F	2.90277	-0.462348	-1.25591
336		F	2.35469	-2.74104	1.2822
337		F	2.67148	-2.98505	-0.869207
338		F	0.23688	-2.35448	-1.42771
339		F	-0.066218	-3.24702	0.53549
340		C	-2.882	-1.74681	-0.858352
341		C	-4.53766	0.480555	-0.235797
342		H	-2.24995	-2.5911	-1.11057
343		H	-5.15013	1.34022	0.011479
344		C	-4.17553	-1.64164	-1.36604
345		C	-4.99183	-0.547879	-1.06451
346		H	-4.55516	-2.42474	-2.01432
347		H	-1.05635	3.8525	0.351609
348		C	1.14403	5.05997	-1.17952
349		H	1.33219	4.99897	-2.25549
350		H	0.265782	5.69049	-1.02211
351		H	2.0044	5.5498	-0.713617
352		O	-2.64844	1.23726	1.13374
353		H	-5.99377	-0.494608	-1.47709
354
355	Closed-ring isomer of I1
356		C	1.01212	-0.934315	0.375598
357		C	2.03866	0.084359	0.343904
358		C	-0.281294	-0.612145	0.514369
359		C	1.63893	1.37381	0.122183
360		C	-2.72379	-0.123547	0.226509
361		C	1.12851	3.74785	-0.484751
362		N	0.314386	1.71663	0.226017
363		C	-0.626375	0.813797	0.93376
364		C	-0.447124	1.00233	2.44955
365		H	-0.714381	2.02454	2.7382
366		H	-1.0952	0.299948	2.98062
367		H	0.592314	0.809672	2.73159
368		C	0.052047	3.04116	-0.108841
369		S	2.57575	2.73851	-0.437014
370		C	1.20343	5.17741	-0.9107
371		H	1.87502	5.75038	-0.263619
372		H	1.56789	5.26932	-1.93857
373		H	0.210527	5.63084	-0.859796
374		C	-4.16186	-0.253199	-0.070818
375		C	-5.0859	0.602343	0.540926
376		C	-4.62362	-1.22207	-0.96856
377		C	-6.44002	0.503847	0.24488
378		H	-4.73875	1.32894	1.26951
379		C	-5.97979	-1.32058	-1.26062
380		H	-3.91441	-1.88773	-1.45248
381		C	-6.89069	-0.457325	-0.657619
382		H	-7.14673	1.17022	0.72938
383		H	-6.32428	-2.07298	-1.96281
384		H	-7.94921	-0.537721	-0.883733
385		C	3.3675	-0.522525	0.097621
386		C	1.64493	-2.26505	0.084144
387		C	3.01789	-1.89691	-0.524704
388		F	4.09363	-0.743169	1.22548
389		F	4.14787	0.209203	-0.733673
390		F	3.94881	-2.82947	-0.291453
391		F	2.87069	-1.74078	-1.85456
392		F	0.917592	-3.03321	-0.75117
393		F	1.85647	-2.97513	1.21712
394		C	-2.06365	1.00288	0.527224
395		S	-1.71539	-1.58948	0.227379
396		H	-2.56034	1.96584	0.587925
397		H	-0.963548	3.40794	-0.054199
398
399	Transition state of I1
400		C	1.07218	-0.914926	0.478689
401		C	2.00877	0.12646	0.439563
402		C	-0.273008	-0.712514	0.715274
403		C	1.5609	1.46293	0.294883
404		C	-2.70221	-0.270394	0.35951
405		C	0.919076	3.70109	-0.555917
406		N	0.352753	1.85105	0.692723
407		C	-0.719727	0.465552	1.4263
408		C	-0.231843	0.691288	2.84187
409		H	-0.458827	1.71002	3.16747
410		H	-0.74547	-0.016045	3.50087
411		H	0.844498	0.524234	2.92034
412		C	-0.028877	3.06725	0.172352
413		S	2.34051	2.69347	-0.673503
414		C	0.87319	5.06853	-1.15933
415		H	1.6137	5.7329	-0.703557
416		H	1.06796	5.03514	-2.23544
417		H	-0.116912	5.50417	-1.00526
418		C	-4.11492	-0.344758	-0.050483
419		C	-5.11468	0.189799	0.771633
420		C	-4.48164	-0.94079	-1.26289
421		C	-6.44775	0.141891	0.382356
422		H	-4.84395	0.620682	1.73075
423		C	-5.81654	-0.9906	-1.64824
424		H	-3.71406	-1.34933	-1.91423
425		C	-6.80296	-0.447576	-0.829052
426		H	-7.21274	0.55544	1.03198
427		H	-6.08542	-1.45183	-2.59319
428		H	-7.84495	-0.488503	-1.13009
429		C	3.35805	-0.394795	0.085498
430		C	1.71923	-2.20135	0.037705
431		C	3.06101	-1.75816	-0.580693
432		F	4.15636	-0.604006	1.16289
433		F	4.0431	0.414379	-0.758692
434		F	4.0368	-2.65472	-0.394316
435		F	2.88784	-1.55936	-1.90125
436		F	0.962283	-2.8816	-0.850506
437		F	1.96266	-3.02352	1.08208
438		C	-2.13437	0.676558	1.14884
439		S	-1.58667	-1.51921	-0.144153
440		H	-2.69076	1.50468	1.57583
441		H	-1.00871	3.45942	0.418933
442
443	Closed-ring isomer of I2
444		C	1.07969	-0.941379	0.373244
445		C	2.02266	0.151545	0.315512
446		C	-0.228328	-0.71946	0.556088
447		C	1.51761	1.41233	0.134348
448		C	-2.63035	-0.258419	0.263008
449		C	0.800549	3.75605	-0.384092
450		N	0.178824	1.65261	0.287983
451		C	-0.68935	0.671636	0.967638
452		C	-0.603651	0.873074	2.48392
453		H	-0.973998	1.86771	2.74835
454		H	-1.2123	0.115947	2.98584
455		H	0.435753	0.768705	2.8084
456		C	-0.205948	2.95997	0.007178
457		S	2.32274	2.85956	-0.416819
458		C	0.753618	5.19785	-0.771265
459		H	1.40004	5.80405	-0.128852
460		H	1.0759	5.34434	-1.80688
461		H	-0.26908	5.57048	-0.676658
462		C	-4.06085	-0.372654	-0.083272
463		C	-4.89983	0.724011	0.144785
464		C	-4.58693	-1.54423	-0.633051
465		C	-6.24838	0.645534	-0.175003
466		H	-4.47567	1.62401	0.576688
467		C	-5.93908	-1.61898	-0.950813
468		H	-3.9407	-2.3952	-0.829224
469		C	-6.77051	-0.526134	-0.722316
470		H	-6.89628	1.49722	0.00603
471		H	-6.34117	-2.53068	-1.38026
472		H	-7.82576	-0.586583	-0.969609
473		C	3.3855	-0.349449	0.023415
474		C	1.80458	-2.22127	0.066248
475		C	3.12358	-1.74825	-0.58804
476		F	4.16521	-0.51167	1.12535
477		F	4.07775	0.439864	-0.832508
478		F	4.13105	-2.60532	-0.386006
479		F	2.91998	-1.60758	-1.91203
480		F	1.11084	-3.04625	-0.742103
481		F	2.10659	-2.90568	1.19395
482		S	-1.62793	-1.74898	0.329423
483		H	-1.25144	3.21566	0.112242
484		N	-2.06346	0.849413	0.535893
485
486	Transition state of I2
487		C	1.13565	-0.916321	0.458492
488		C	1.98034	0.195849	0.421496
489		C	-0.223267	-0.831	0.703219
490		C	1.42745	1.49877	0.297214
491		C	-2.61424	-0.4414	0.37174
492		C	0.602996	3.68794	-0.515269
493		N	0.197994	1.78259	0.706821
494		C	-0.782546	0.295282	1.41483
495		C	-0.362845	0.558284	2.83926
496		H	-0.682609	1.55613	3.14548
497		H	-0.8488	-0.185667	3.47888
498		H	0.719567	0.467031	2.94899
499		C	-0.286141	2.97062	0.212402
500		S	2.09907	2.7992	-0.65764
501		C	0.442695	5.05457	-1.10083
502		H	1.13055	5.77091	-0.641318
503		H	0.630898	5.0505	-2.17862
504		H	-0.578116	5.40627	-0.933895
505		C	-4.02769	-0.476895	-0.041196
506		C	-4.89342	0.51526	0.434293
507		C	-4.52022	-1.47184	-0.891482
508		C	-6.23031	0.510541	0.059059
509		H	-4.49747	1.27566	1.09841
510		C	-5.85931	-1.47349	-1.26316
511		H	-3.85952	-2.24821	-1.26807
512		C	-6.71639	-0.482774	-0.789671
513		H	-6.89697	1.28185	0.431441
514		H	-6.23344	-2.24916	-1.92329
515		H	-7.7622	-0.485789	-1.0805
516		C	3.3694	-0.210614	0.068623
517		C	1.88373	-2.14619	0.016359
518		C	3.18857	-1.5952	-0.595878
519		F	4.18123	-0.349443	1.14638
520		F	3.98182	0.653753	-0.776213
521		F	4.23285	-2.40832	-0.40014
522		F	3.00772	-1.41485	-1.91773
523		F	1.18308	-2.87663	-0.878736
524		F	2.1853	-2.95353	1.05627
525		S	-1.49111	-1.67595	-0.170157
526		H	-1.294	3.26952	0.475398
527		N	-2.13942	0.476251	1.15409
528
529	Closed-ring isomer of I3
530		C	0.858543	-0.911117	0.246609
531		C	1.37569	0.42445	0.450933
532		C	0.511627	1.46369	0.233745
533		C	-0.840189	3.44849	-0.459428
534		N	-0.841851	1.23387	0.1654
535		C	-1.57323	2.34511	-0.247927
536		S	0.868052	3.12788	-0.161488
537		C	-1.30109	4.79906	-0.900695
538		H	-1.04184	5.56708	-0.165061
539		H	-0.849209	5.08309	-1.85609
540		H	-2.38679	4.79689	-1.0242
541		C	2.85462	0.426344	0.354525
542		C	2.00049	-1.82869	-0.081565
543		C	3.15798	-0.867999	-0.440151
544		F	3.48695	0.341406	1.55459
545		F	3.35177	1.51687	-0.276072
546		F	4.35987	-1.385	-0.159343
547		F	3.09246	-0.587711	-1.75605
548		F	1.72759	-2.68114	-1.09034
549		F	2.37301	-2.5669	0.990238
550		H	-2.6391	2.25273	-0.392796
551		C	-0.462134	-1.14205	0.219822
552		C	-1.37512	-0.031179	0.736431
553		C	-2.77259	-0.397408	0.278343
554		C	-2.86124	-1.66749	-0.301458
555		C	-3.94266	0.316162	0.529171
556		C	-4.08748	-2.19405	-0.698699
557		C	-5.17383	-0.196846	0.128191
558		H	-3.90184	1.26693	1.05455
559		C	-5.24034	-1.44294	-0.493132
560		H	-4.14141	-3.17761	-1.15427
561		H	-6.08072	0.368839	0.313099
562		H	-6.20034	-1.84298	-0.803467
563		S	-1.32471	-2.53401	-0.424081
564		C	-1.32087	0.055156	2.26999
565		H	-0.296212	0.236774	2.60436
566		H	-1.96446	0.867375	2.62377
567		H	-1.67241	-0.888276	2.69595
568
569	Transition state of I3
570		C	0.838394	-0.904601	0.309747
571		C	1.33492	0.388971	0.499513
572		C	-0.515341	-1.19588	0.299372
573		C	0.476242	1.5093	0.348677
574		C	-2.85717	-1.56893	-0.487299
575		C	-0.758143	3.47381	-0.518198
576		N	-0.836305	1.43282	0.547232
577		C	-1.43001	-0.342515	1.00212
578		C	-1.24354	-0.13044	2.48796
579		H	-1.81476	0.734789	2.83347
580		H	-1.59852	-1.02428	3.01105
581		H	-0.19082	0.024322	2.73203
582		C	-1.52944	2.49458	0.010168
583		S	0.922353	3.01643	-0.418834
584		C	-1.18152	4.79695	-1.07162
585		H	-0.798419	5.62505	-0.46753
586		H	-0.821797	4.93265	-2.09588
587		H	-2.27233	4.85757	-1.08206
588		C	-4.07916	-1.92534	-1.06103
589		C	-5.22986	-1.27625	-0.635376
590		C	2.8217	0.400204	0.391808
591		C	1.95906	-1.83634	-0.069164
592		C	3.144	-0.898753	-0.382425
593		F	3.4461	0.35545	1.59522
594		F	3.30522	1.48362	-0.262267
595		F	4.32478	-1.42811	-0.042223
596		F	3.14472	-0.621165	-1.6997
597		F	1.64709	-2.61208	-1.1297
598		F	2.29719	-2.65462	0.951332
599		C	-2.79313	-0.576338	0.503495
600		S	-1.30207	-2.2775	-0.869482
601		H	-2.61001	2.51085	0.093715
602		C	-3.96535	0.052159	0.936115
603		C	-5.17931	-0.291256	0.359819
604		H	-4.12693	-2.6954	-1.82426
605		H	-6.18457	-1.54264	-1.07804
606		H	-6.09266	0.196065	0.684176
607		H	-3.91952	0.804433	1.71965
608
609	Closed-ring isomer of I4
610		C	0.746155	-0.975047	0.271699
611		C	1.28046	0.370264	0.417725
612		C	0.433697	1.41814	0.200056
613		C	-0.913121	3.44836	-0.390942
614		N	-0.929631	1.21392	0.154958
615		C	-1.65704	2.35426	-0.174719
616		S	0.803962	3.08493	-0.184227
617		C	-1.36215	4.81999	-0.77485
618		H	-1.04639	5.56252	-0.035142
619		H	-0.952285	5.11753	-1.74505
620		H	-2.45244	4.84704	-0.842743
621		C	2.75725	0.342728	0.300038
622		C	1.86016	-1.91511	-0.085794
623		C	3.02379	-0.969395	-0.477595
624		F	3.40423	0.262279	1.49295
625		F	3.26481	1.41431	-0.353314
626		F	4.22341	-1.49994	-0.212019
627		F	2.93766	-0.707266	-1.79621
628		F	1.55864	-2.75943	-1.08919
629		F	2.25252	-2.65728	0.976133
630		H	-2.73246	2.28318	-0.25829
631		C	-0.575594	-1.14959	0.319172
632		C	-1.47882	-0.008017	0.769951
633		C	-2.80088	-0.507903	0.227835
634		C	-2.60366	-1.81922	-0.205561
635		C	-4.08703	0.01528	0.247549
636		C	-3.63031	-2.61873	-0.676156
637		C	-5.14048	-0.764082	-0.233429
638		H	-4.28321	1.00773	0.644026
639		C	-4.90849	-2.06139	-0.691896
640		H	-3.43492	-3.63072	-1.01105
641		H	-6.14795	-0.362502	-0.23854
642		H	-5.73907	-2.65596	-1.05851
643		C	-1.50814	0.154637	2.29655
644		H	-0.506185	0.389203	2.66714
645		H	-2.19279	0.963771	2.57216
646		H	-1.8521	-0.77336	2.76064
647		O	-1.3003	-2.23624	-0.099327
648
649	Transition state of I4
650		C	0.699807	-0.948969	0.196577
651		C	1.24469	0.325702	0.415891
652		C	-0.650083	-1.17736	0.303487
653		C	0.414541	1.46967	0.316338
654		C	-2.64491	-1.67757	-0.448232
655		C	-0.765266	3.50924	-0.450344
656		N	-0.892505	1.44413	0.564313
657		C	-1.53096	-0.304639	1.02847
658		C	-1.36416	-0.074338	2.51078
659		H	-1.95378	0.786735	2.83586
660		H	-1.71073	-0.965103	3.04423
661		H	-0.315993	0.103167	2.76078
662		C	-1.55815	2.54877	0.080151
663		S	0.897029	2.9726	-0.432162
664		C	-1.14882	4.8648	-0.951313
665		H	-0.706966	5.65776	-0.340279
666		H	-0.821662	5.01372	-1.98463
667		H	-2.2355	4.97349	-0.918511
668		C	-3.69077	-2.26584	-1.14842
669		C	-4.96795	-1.78394	-0.886323
670		C	2.71656	0.324042	0.186095
671		C	1.75249	-1.85652	-0.378192
672		C	3.07313	-1.17482	0.045834
673		F	3.43396	0.897755	1.18032
674		F	3.06678	0.976463	-0.956876
675		F	3.44323	-1.65588	1.24694
676		F	4.05931	-1.38072	-0.834957
677		F	1.69579	-1.89329	-1.72928
678		F	1.68414	-3.12137	0.073401
679		C	-2.84663	-0.647106	0.477948
680		H	-2.63251	2.61213	0.208832
681		C	-4.13913	-0.19132	0.743761
682		C	-5.19686	-0.761074	0.047774
683		H	-3.5063	-3.06195	-1.86027
684		H	-5.81172	-2.21565	-1.41539
685		H	-6.21069	-0.420693	0.228866
686		H	-4.31045	0.591339	1.47801
687		O	-1.34034	-2.02805	-0.553842

## Sheet: MPW1PW91
1	Table of Contents
2	Structure				Row
3	Closed-ring isomer of N1				21
4	Transition state of N1				65
5	Closed-ring isomer of N2				109
6	Transition state of N2				152
7	Closed-ring isomer of N3				195
8	Transition state of N3				235
9	Closed-ring isomer of N4				275
10	Transition state of N4				315
11	Closed-ring isomer of I1				355
12	Transition state of I1				399
13	Closed-ring isomer of I2				443
14	Transition state of I2				486
15	Closed-ring isomer of I3				529
16	Transition state of I3				569
17	Closed-ring isomer of I4				609
18	Transition state of I4				649
19
20	Structure	Atom	x	y	z
21	Closed-ring isomer of N1
22		C	0.816271	-0.95589	0.34804
23		C	2.00451	-0.166948	0.233153
24		C	-0.408608	-0.385383	0.485824
25		C	1.87164	1.1835	0.026069
26		C	-2.7014	0.014653	0.178277
27		C	1.85611	3.62764	-0.514598
28		N	0.646124	1.78981	0.157108
29		C	-0.435766	1.08885	0.863869
30		C	-0.283964	1.27649	2.37423
31		H	-0.342446	2.33443	2.64556
32		H	-1.08113	0.735783	2.88872
33		H	0.68062	0.874609	2.69985
34		C	0.661631	3.14627	-0.130336
35		S	3.05577	2.3362	-0.525232
36		C	2.21682	5.01763	-0.908947
37		H	3.00627	5.42546	-0.2691
38		H	2.57151	5.06448	-1.94378
39		H	1.34285	5.6675	-0.823252
40		C	-4.11634	-0.21016	-0.102748
41		C	-5.07999	0.76798	0.184034
42		C	-4.54673	-1.41983	-0.673125
43		C	-6.42535	0.542098	-0.08103
44		H	-4.77466	1.70473	0.639814
45		C	-5.89105	-1.64477	-0.92895
46		H	-3.81767	-2.17775	-0.938155
47		C	-6.83838	-0.665203	-0.635004
48		H	-7.15347	1.31211	0.152779
49		H	-6.20076	-2.58553	-1.37261
50		H	-7.8888	-0.841576	-0.841883
51		C	3.20035	-1.02137	0.064326
52		C	1.17173	-2.40183	0.181731
53		C	2.6025	-2.36959	-0.414526
54		F	3.88424	-1.23625	1.22371
55		F	4.09896	-0.534549	-0.827918
56		F	3.33724	-3.42805	-0.048751
57		F	2.50944	-2.34473	-1.7598
58		F	0.321218	-3.08693	-0.616487
59		F	1.20965	-3.04867	1.37494
60		H	-0.256378	3.71009	-0.043246
61		S	-2.09856	1.68182	0.316896
62		C	-1.71904	-0.915794	0.302823
63		H	-1.90056	-1.97865	0.20897
64
65	Transition state of N1
66		C	0.940514	-0.931444	0.464385
67		C	1.98366	-0.026846	0.270717
68		C	-0.365676	-0.541275	0.787506
69		C	1.71817	1.35832	0.133302
70		C	-2.66828	-0.245482	0.415441
71		C	1.32062	3.66154	-0.691256
72		N	0.626304	1.92202	0.645127
73		C	-0.548112	0.693369	1.52328
74		C	0.08313	0.884675	2.88036
75		H	0.002238	1.92217	3.21311
76		H	-0.427756	0.242614	3.60364
77		H	1.1384	0.606848	2.85196
78		C	0.374046	3.17344	0.150127
79		S	2.55415	2.45315	-0.938222
80		C	1.40987	5.01664	-1.30717
81		H	2.28006	5.57183	-0.942393
82		H	1.48649	4.95826	-2.39738
83		H	0.514994	5.59345	-1.06254
84		C	-4.01337	-0.393216	-0.128851
85		C	-4.4801	-1.6572	-0.526259
86		C	-4.87617	0.703805	-0.269978
87		C	-5.75075	-1.8099	-1.0619
88		H	-3.8449	-2.52683	-0.394725
89		C	-6.15085	0.545694	-0.79977
90		H	-4.5389	1.69379	0.022234
91		C	-6.59507	-0.710095	-1.20215
92		H	-6.08891	-2.79699	-1.36098
93		H	-6.79816	1.41098	-0.901925
94		H	-7.59101	-0.833215	-1.61466
95		C	3.24436	-0.722816	-0.097059
96		C	1.40692	-2.32195	0.132269
97		C	2.76793	-2.11552	-0.573566
98		F	4.09105	-0.876723	0.956305
99		F	3.94786	-0.089322	-1.0699
100		F	3.64471	-3.0902	-0.29944
101		F	2.56692	-2.06837	-1.90583
102		F	0.548886	-3.00304	-0.663395
103		F	1.5886	-3.06287	1.25224
104		H	-0.506057	3.70402	0.490899
105		S	-2.255	1.1412	1.43911
106		H	-1.60203	-1.91653	-0.411191
107		C	-1.58202	-1.04163	0.224578
108
109	Closed-ring isomer of N2
110		C	0.691274	-0.943079	0.335153
111		C	1.93965	-0.25214	0.234402
112		C	-0.472856	-0.266417	0.49243
113		C	1.92432	1.10581	0.036273
114		C	-2.61454	0.19144	0.177116
115		C	2.12169	3.54378	-0.498704
116		N	0.754692	1.81554	0.162706
117		C	-0.381988	1.2147	0.869955
118		C	-0.228443	1.4065	2.37915
119		H	-0.224031	2.46805	2.6425
120		H	-1.05712	0.918722	2.89684
121		H	0.709302	0.950871	2.71197
122		C	0.887769	3.16673	-0.123112
123		S	3.20699	2.15514	-0.500445
124		C	2.60322	4.8979	-0.889152
125		H	3.42087	5.23516	-0.243784
126		H	2.96718	4.9143	-1.92161
127		H	1.78818	5.62077	-0.808017
128		C	-4.02589	-0.056982	-0.094008
129		C	-4.96796	0.978411	-0.122861
130		C	-4.44726	-1.37342	-0.338729
131		C	-6.30269	0.705644	-0.3963
132		H	-4.66167	1.99993	0.081445
133		C	-5.78106	-1.63946	-0.605839
134		H	-3.70912	-2.16679	-0.318557
135		C	-6.71321	-0.602169	-0.637364
136		H	-7.02389	1.51601	-0.415419
137		H	-6.09721	-2.66012	-0.79486
138		H	-7.7563	-0.814166	-0.848614
139		C	3.06438	-1.2015	0.080194
140		C	0.920658	-2.4143	0.140182
141		C	2.36697	-2.49116	-0.421637
142		F	3.70407	-1.47742	1.2514
143		F	4.01669	-0.780798	-0.789613
144		F	3.00437	-3.60834	-0.048312
145		F	2.3101	-2.44818	-1.76847
146		F	0.047762	-3.00595	-0.695183
147		F	0.878039	-3.07995	1.3217
148		H	0.019942	3.80563	-0.039287
149		N	-1.73758	-0.74344	0.308266
150		S	-1.99757	1.87555	0.288828
151
152	Transition state of N2
153		C	0.812478	-0.904699	0.495564
154		C	1.9289	-0.098697	0.289615
155		C	-0.448647	-0.38466	0.811035
156		C	1.7893	1.30011	0.099991
157		C	-2.60237	-0.044237	0.41033
158		C	1.61155	3.59295	-0.824354
159		N	0.749466	1.98212	0.574551
160		C	-0.53077	0.889698	1.49853
161		C	0.10803	1.0953	2.8492
162		H	0.127579	2.15154	3.1261
163		H	-0.466069	0.544303	3.59985
164		H	1.13123	0.715015	2.84547
165		C	0.616584	3.22933	0.02444
166		S	2.73218	2.26917	-1.00264
167		C	1.82942	4.90669	-1.49539
168		H	2.74317	5.39572	-1.14277
169		H	1.91052	4.7944	-2.58099
170		H	0.988552	5.57219	-1.28716
171		C	-3.93663	-0.2575	-0.139376
172		C	-4.19379	-1.43649	-0.855901
173		C	-4.96793	0.674359	0.027289
174		C	-5.45287	-1.6703	-1.38731
175		H	-3.3896	-2.15205	-0.98306
176		C	-6.22658	0.436153	-0.511337
177		H	-4.7912	1.59205	0.580977
178		C	-6.47461	-0.736107	-1.21916
179		H	-5.63953	-2.58621	-1.93875
180		H	-7.01595	1.16811	-0.37457
181		H	-7.45844	-0.922149	-1.63749
182		C	3.13073	-0.914065	-0.031748
183		C	1.15066	-2.34272	0.200424
184		C	2.54262	-2.27385	-0.476701
185		F	3.9389	-1.10492	1.04503
186		F	3.90463	-0.373128	-1.00687
187		F	3.32626	-3.3104	-0.151676
188		F	2.37811	-2.25065	-1.81429
189		F	0.260793	-2.96302	-0.593812
190		F	1.24934	-3.05969	1.34789
191		H	-0.212322	3.85357	0.33319
192		S	-2.20149	1.43153	1.34609
193		N	-1.61485	-0.860535	0.273534
194
195	Closed-ring isomer of N3
196		C	-0.107165	-0.84828	0.195194
197		C	1.2806	-0.487712	0.252283
198		C	-1.09488	0.077818	0.263162
199		C	1.62044	0.829545	0.087925
200		C	-3.10741	1.25318	-0.203449
201		C	2.46223	3.14326	-0.355357
202		N	0.648866	1.79567	0.079447
203		C	-0.67887	1.49855	0.63366
204		C	-0.668659	1.69602	2.15074
205		H	-0.413101	2.72686	2.41158
206		H	-1.65579	1.46496	2.55681
207		H	0.063777	1.01911	2.60226
208		C	1.13554	3.07383	-0.152317
209		S	-1.959	2.59281	-0.141273
210		S	3.17616	1.53521	-0.249335
211		C	-2.52727	-0.006126	0.045502
212		C	3.29885	4.34012	-0.647328
213		H	4.08177	4.47683	0.105807
214		H	3.78792	4.26239	-1.62382
215		H	2.67561	5.2373	-0.653692
216		C	2.15839	-1.67434	0.257385
217		C	-0.199267	-2.33315	-0.033782
218		C	1.2577	-2.77831	-0.345009
219		F	2.54228	-2.05866	1.50904
220		F	3.2988	-1.5166	-0.460842
221		F	1.52677	-3.99836	0.13839
222		F	1.43027	-2.78982	-1.68148
223		F	-1.01405	-2.6778	-1.05479
224		F	-0.641942	-2.98825	1.07043
225		H	0.444178	3.90468	-0.162417
226		C	-4.46067	1.39359	-0.479426
227		C	-3.35672	-1.13339	0.050782
228		H	-2.94673	-2.10894	0.275966
229		H	-4.88709	2.37212	-0.672383
230		C	-4.71283	-0.997054	-0.217783
231		C	-5.2624	0.255317	-0.490209
232		H	-5.34895	-1.87563	-0.206985
233		H	-6.32301	0.350369	-0.698098
234
235	Transition state of N3
236		C	0.176213	-0.86371	0.304515
237		C	1.3229	-0.069422	0.256459
238		C	-1.10512	-0.346358	0.530841
239		C	1.21892	1.33774	0.11005
240		C	-3.35208	0.285659	0.088277
241		C	1.17578	3.6733	-0.709632
242		N	0.152705	2.01587	0.515837
243		C	-1.18601	0.870156	1.30449
244		C	-0.593172	0.956439	2.68934
245		H	-0.571024	1.98844	3.04676
246		H	-1.21038	0.362169	3.36952
247		H	0.422386	0.558115	2.70244
248		C	0.096846	3.29131	0.022139
249		S	-2.81074	1.56057	1.17655
250		S	2.28084	2.33072	-0.848985
251		C	-2.35893	-0.691933	-0.118846
252		C	1.48108	5.01193	-1.29128
253		H	2.36872	5.46053	-0.833824
254		H	1.65754	4.95116	-2.36966
255		H	0.638388	5.68693	-1.12527
256		C	2.54923	-0.866813	0.001304
257		C	0.55838	-2.26819	-0.078787
258		C	2.07746	-2.3242	0.201349
259		F	3.57794	-0.566001	0.832772
260		F	3.03126	-0.711904	-1.26554
261		F	2.27233	-2.68571	1.48499
262		F	2.71609	-3.18938	-0.596686
263		F	0.361706	-2.50713	-1.40452
264		F	-0.107547	-3.22063	0.603775
265		H	-0.746335	3.91866	0.281882
266		C	-2.67949	-1.78502	-0.93492
267		C	-4.60814	0.211768	-0.497207
268		H	-1.94806	-2.55741	-1.12995
269		H	-5.3456	0.989326	-0.327649
270		C	-3.94422	-1.88036	-1.50079
271		C	-4.90536	-0.890378	-1.29223
272		H	-4.18176	-2.73778	-2.12191
273		H	-5.8861	-0.976611	-1.74768
274
275	Closed-ring isomer of N4
276		C	-0.019277	-0.890776	0.291955
277		C	1.25706	-0.230381	0.307582
278		C	-1.16901	-0.182064	0.377664
279		C	1.28648	1.12918	0.110682
280		C	-3.11634	0.921798	-0.033157
281		C	1.53984	3.5635	-0.431799
282		N	0.128819	1.85989	0.170436
283		C	-1.05612	1.27372	0.796192
284		C	-1.0181	1.467	2.30709
285		H	-1.00284	2.5321	2.55458
286		H	-1.90488	1.00907	2.75141
287		H	-0.12867	0.986667	2.72234
288		C	0.281357	3.2052	-0.122337
289		S	2.60913	2.16199	-0.357775
290		C	-2.56073	-0.366423	0.037625
291		C	2.36557	-1.20327	0.211341
292		C	0.199264	-2.35746	0.066227
293		C	1.67973	-2.45818	-0.385515
294		F	2.90582	-1.53635	1.41824
295		F	3.39412	-0.784431	-0.568186
296		F	2.2556	-3.60489	-0.001407
297		F	1.72742	-2.37339	-1.73066
298		F	-0.624764	-2.9003	-0.858737
299		F	0.03883	-3.06649	1.2119
300		C	-4.42758	1.15508	-0.39909
301		C	-3.3594	-1.46695	-0.274382
302		H	-2.95045	-2.4689	-0.241066
303		H	-4.82094	2.16368	-0.447273
304		C	-4.68782	-1.2516	-0.631311
305		C	-5.21355	0.039866	-0.69526
306		H	-5.32105	-2.10027	-0.866313
307		H	-0.592217	3.83989	-0.09474
308		C	2.06083	4.90747	-0.806858
309		H	2.84293	5.24247	-0.117671
310		H	2.4852	4.90934	-1.81616
311		H	1.25094	5.64013	-0.780697
312		H	-6.25126	0.184136	-0.977272
313		O	-2.22262	1.91365	0.280494
314
315	Transition state of N4
316		C	0.140014	-0.875171	0.349549
317		C	1.23439	-0.009537	0.310963
318		C	-1.15989	-0.451364	0.600638
319		C	1.02898	1.39014	0.191324
320		C	-3.27577	0.299011	0.282412
321		C	0.843002	3.74075	-0.571221
322		N	-0.089919	1.98516	0.591087
323		C	-1.38321	0.760644	1.34853
324		C	-0.926084	0.962586	2.75985
325		H	-1.03254	2.00737	3.05722
326		H	-1.54785	0.341915	3.41317
327		H	0.114935	0.658805	2.87103
328		C	-0.219439	3.26818	0.130482
329		S	2.03796	2.47848	-0.721957
330		C	-2.42099	-0.761651	-0.03881
331		C	2.49319	-0.725794	-0.017849
332		C	0.571677	-2.23594	-0.114695
333		C	2.10516	-2.22143	0.084922
334		F	3.5248	-0.433416	0.813698
335		F	2.94123	-0.458324	-1.27877
336		F	2.38757	-2.6726	1.32292
337		F	2.74765	-2.98034	-0.812541
338		F	0.298963	-2.42467	-1.43408
339		F	-0.009187	-3.24844	0.560286
340		C	-2.89156	-1.76135	-0.891557
341		C	-4.56251	0.427603	-0.193541
342		H	-2.25617	-2.59046	-1.178
343		H	-5.18268	1.27309	0.080448
344		C	-4.19684	-1.66714	-1.36823
345		C	-5.0222	-0.592328	-1.02929
346		H	-4.57814	-2.44453	-2.02207
347		H	-1.10545	3.83239	0.392047
348		C	1.06645	5.11012	-1.11735
349		H	1.25791	5.08792	-2.19471
350		H	0.179802	5.72478	-0.94555
351		H	1.91794	5.60445	-0.638702
352		O	-2.65966	1.18934	1.14451
353		H	-6.03392	-0.546244	-1.41756
354
355	Closed-ring isomer of I1
356		C	1.01617	-0.930969	0.329958
357		C	2.03352	0.088278	0.290621
358		C	-0.280892	-0.6096	0.485095
359		C	1.63041	1.38452	0.100086
360		C	-2.72979	-0.131073	0.219977
361		C	1.10715	3.76209	-0.486033
362		N	0.304809	1.72225	0.215716
363		C	-0.628622	0.808897	0.921222
364		C	-0.442637	0.984192	2.43866
365		H	-0.710723	2.00081	2.744
366		H	-1.08544	0.276328	2.96756
367		H	0.596161	0.791478	2.72001
368		C	0.035675	3.04097	-0.113217
369		S	2.5561	2.75957	-0.443828
370		C	1.17045	5.19182	-0.898371
371		H	1.83771	5.76887	-0.249491
372		H	1.53248	5.30117	-1.92599
373		H	0.175549	5.64015	-0.843164
374		C	-4.16476	-0.263447	-0.066731
375		C	-5.09206	0.577897	0.561887
376		C	-4.63199	-1.22171	-0.974681
377		C	-6.44695	0.476602	0.273901
378		H	-4.74697	1.29602	1.29852
379		C	-5.98879	-1.32315	-1.25839
380		H	-3.92514	-1.87626	-1.47487
381		C	-6.90011	-0.47361	-0.63803
382		H	-7.15287	1.1325	0.773092
383		H	-6.33363	-2.06733	-1.96875
384		H	-7.95953	-0.55626	-0.857657
385		C	3.37141	-0.509883	0.101701
386		C	1.65107	-2.26281	0.065984
387		C	3.0522	-1.90641	-0.492257
388		F	4.06534	-0.683439	1.26341
389		F	4.17795	0.203643	-0.724151
390		F	3.97551	-2.82946	-0.192521
391		F	2.96667	-1.79264	-1.8338
392		F	0.953692	-3.03302	-0.796979
393		F	1.80556	-2.97555	1.21047
394		C	-2.06645	0.99552	0.52744
395		S	-1.71161	-1.58416	0.199425
396		H	-2.56521	1.95483	0.603177
397		H	-0.980572	3.40094	-0.056762
398
399	Transition state of I1
400		C	1.05905	-0.918267	0.428437
401		C	2.0018	0.120926	0.385693
402		C	-0.283547	-0.698957	0.667556
403		C	1.56757	1.4583	0.254996
404		C	-2.72172	-0.256331	0.339408
405		C	0.954963	3.72405	-0.556314
406		N	0.353478	1.85259	0.642821
407		C	-0.722033	0.489507	1.37773
408		C	-0.237027	0.700351	2.79546
409		H	-0.459403	1.71483	3.13629
410		H	-0.75457	-0.009974	3.44842
411		H	0.836823	0.526765	2.88168
412		C	-0.008155	3.07772	0.145516
413		S	2.36773	2.70445	-0.673179
414		C	0.931031	5.10417	-1.12024
415		H	1.66637	5.7543	-0.635004
416		H	1.14593	5.10418	-2.1935
417		H	-0.057446	5.54631	-0.974928
418		C	-4.13474	-0.333987	-0.048751
419		C	-5.12562	0.225386	0.769851
420		C	-4.52369	-0.958552	-1.24114
421		C	-6.4628	0.173388	0.398743
422		H	-4.8455	0.678917	1.71469
423		C	-5.86264	-1.01242	-1.60806
424		H	-3.7689	-1.38585	-1.89387
425		C	-6.8369	-0.444828	-0.791843
426		H	-7.21697	0.606651	1.04779
427		H	-6.14429	-1.49601	-2.53769
428		H	-7.8825	-0.488802	-1.07852
429		C	3.35821	-0.407015	0.094094
430		C	1.70958	-2.21259	0.02964
431		C	3.08294	-1.79148	-0.542166
432		F	4.11977	-0.577552	1.21001
433		F	4.07784	0.378707	-0.747321
434		F	4.04564	-2.68769	-0.287551
435		F	2.97239	-1.63534	-1.87712
436		F	0.986966	-2.90629	-0.880379
437		F	1.89843	-3.02422	1.0978
438		C	-2.13546	0.698477	1.11123
439		S	-1.61124	-1.50933	-0.159194
440		H	-2.68557	1.52923	1.53815
441		H	-0.986355	3.47371	0.386703
442
443	Closed-ring isomer of I2
444		C	1.08367	-0.936804	0.330791
445		C	2.01584	0.157	0.259549
446		C	-0.227029	-0.717003	0.532488
447		C	1.50571	1.42296	0.11048
448		C	-2.63404	-0.270512	0.256425
449		C	0.774117	3.76912	-0.381706
450		N	0.167344	1.65734	0.279969
451		C	-0.694642	0.666887	0.955289
452		C	-0.608225	0.858294	2.4738
453		H	-0.98738	1.8454	2.75186
454		H	-1.20895	0.093552	2.97224
455		H	0.429498	0.760759	2.80293
456		C	-0.224524	2.95805	0.008316
457		S	2.29724	2.88002	-0.425806
458		C	0.714383	5.2102	-0.753237
459		H	1.35738	5.81966	-0.109578
460		H	1.03039	5.3751	-1.78859
461		H	-0.309719	5.57685	-0.651654
462		C	-4.05988	-0.386875	-0.080863
463		C	-4.90346	0.706906	0.150654
464		C	-4.59046	-1.55812	-0.630357
465		C	-6.25221	0.626771	-0.163822
466		H	-4.48162	1.60722	0.581912
467		C	-5.94268	-1.63498	-0.942078
468		H	-3.94519	-2.40743	-0.831951
469		C	-6.77542	-0.544349	-0.709737
470		H	-6.89998	1.47745	0.020855
471		H	-6.34436	-2.54685	-1.37089
472		H	-7.83125	-0.606195	-0.952717
473		C	3.38871	-0.332998	0.019697
474		C	1.8126	-2.21764	0.054572
475		C	3.16006	-1.75517	-0.555757
476		F	4.14126	-0.441602	1.15255
477		F	4.10154	0.437123	-0.840791
478		F	4.16337	-2.6002	-0.284487
479		F	3.01759	-1.65992	-1.8937
480		F	1.14695	-3.04679	-0.777407
481		F	2.06202	-2.9037	1.19786
482		S	-1.62194	-1.74791	0.31276
483		H	-1.26973	3.20605	0.118873
484		N	-2.06643	0.841241	0.530338
485
486	Transition state of I2
487		C	1.12343	-0.919946	0.411923
488		C	1.97333	0.191232	0.364217
489		C	-0.234094	-0.819269	0.661059
490		C	1.43339	1.49561	0.255814
491		C	-2.63299	-0.434031	0.351478
492		C	0.636352	3.71731	-0.508475
493		N	0.19995	1.78632	0.661954
494		C	-0.791091	0.316449	1.37133
495		C	-0.374537	0.567764	2.79749
496		H	-0.694502	1.56077	3.11795
497		H	-0.861739	-0.180164	3.43188
498		H	0.705759	0.47448	2.9164
499		C	-0.264545	2.98637	0.195848
500		S	2.12215	2.81344	-0.660248
501		C	0.496457	5.09927	-1.05074
502		H	1.18333	5.79877	-0.563239
503		H	0.697507	5.13232	-2.12616
504		H	-0.522282	5.45833	-0.887203
505		C	-4.04383	-0.470976	-0.044106
506		C	-4.90829	0.519626	0.441193
507		C	-4.55018	-1.46386	-0.891098
508		C	-6.24826	0.515654	0.081332
509		H	-4.50694	1.2787	1.1022
510		C	-5.89232	-1.4649	-1.24707
511		H	-3.89561	-2.23868	-1.27869
512		C	-6.74469	-0.475596	-0.763027
513		H	-6.90997	1.28631	0.463091
514		H	-6.27316	-2.23922	-1.90455
515		H	-7.79341	-0.478296	-1.04194
516		C	3.36877	-0.221846	0.066748
517		C	1.87638	-2.15877	0.017332
518		C	3.20841	-1.62821	-0.561246
519		F	4.14752	-0.319954	1.17864
520		F	4.01229	0.618193	-0.783118
521		F	4.24274	-2.4392	-0.303335
522		F	3.08192	-1.49026	-1.89654
523		F	1.20731	-2.91027	-0.887939
524		F	2.13276	-2.94915	1.08667
525		S	-1.51353	-1.67619	-0.177062
526		H	-1.26928	3.29087	0.45906
527		N	-2.14403	0.494273	1.11787
528
529	Closed-ring isomer of I3
530		C	0.866169	-0.899362	0.196708
531		C	1.37492	0.434435	0.390939
532		C	0.500758	1.47439	0.204756
533		C	-0.872145	3.45347	-0.466483
534		N	-0.852439	1.23537	0.146997
535		C	-1.59153	2.3375	-0.256923
536		S	0.836974	3.14337	-0.17625
537		C	-1.34916	4.79889	-0.892008
538		H	-1.09464	5.56766	-0.154685
539		H	-0.910315	5.10028	-1.8488
540		H	-2.43556	4.78961	-1.00816
541		C	2.85262	0.440526	0.357465
542		C	2.00882	-1.82106	-0.100482
543		C	3.19231	-0.867348	-0.404077
544		F	3.42916	0.382965	1.59211
545		F	3.38149	1.52331	-0.265458
546		F	4.37594	-1.38782	-0.054154
547		F	3.20497	-0.601241	-1.72641
548		F	1.77023	-2.66071	-1.13222
549		F	2.32702	-2.58445	0.975381
550		H	-2.65647	2.23573	-0.392515
551		C	-0.459171	-1.13534	0.188313
552		C	-1.37199	-0.034369	0.720699
553		C	-2.77261	-0.409112	0.282162
554		C	-2.86007	-1.67996	-0.299245
555		C	-3.94699	0.29322	0.54401
556		C	-4.08695	-2.21631	-0.681169
557		C	-5.17861	-0.229562	0.158093
558		H	-3.91246	1.24324	1.0689
559		C	-5.24301	-1.4757	-0.461431
560		H	-4.14005	-3.19913	-1.13693
561		H	-6.0871	0.329529	0.353683
562		H	-6.2029	-1.88387	-0.760366
563		S	-1.32152	-2.52577	-0.44589
564		C	-1.29638	0.045589	2.25408
565		H	-0.269424	0.22961	2.57781
566		H	-1.93708	0.850473	2.62734
567		H	-1.63515	-0.900271	2.68333
568
569	Transition state of I3
570		C	0.829301	-0.905359	0.264103
571		C	1.33806	0.388105	0.445162
572		C	-0.528262	-1.17707	0.262825
573		C	0.492053	1.51277	0.307133
574		C	-2.88259	-1.56406	-0.481125
575		C	-0.727778	3.50896	-0.520358
576		N	-0.826587	1.44541	0.499464
577		C	-1.43657	-0.30771	0.96705
578		C	-1.2342	-0.105522	2.45088
579		H	-1.79822	0.756523	2.8145
580		H	-1.58523	-1.00095	2.97409
581		H	-0.180218	0.042136	2.68985
582		C	-1.50592	2.51983	-0.014529
583		S	0.947792	3.033	-0.424614
584		C	-1.13885	4.84675	-1.0349
585		H	-0.75619	5.6585	-0.407671
586		H	-0.774694	5.01492	-2.05327
587		H	-2.2289	4.918	-1.05092
588		C	-4.11027	-1.93719	-1.02888
589		C	-5.25843	-1.28729	-0.598291
590		C	2.82303	0.382737	0.389627
591		C	1.94508	-1.85224	-0.07554
592		C	3.15712	-0.933266	-0.354267
593		F	3.40164	0.354098	1.62132
594		F	3.34691	1.45325	-0.259473
595		F	4.318	-1.47589	0.035833
596		F	3.21647	-0.674337	-1.67613
597		F	1.66344	-2.63455	-1.14298
598		F	2.23378	-2.67391	0.962153
599		C	-2.80422	-0.550369	0.490353
600		S	-1.33598	-2.27689	-0.866996
601		H	-2.58482	2.54497	0.067958
602		C	-3.97632	0.074379	0.928547
603		C	-5.19721	-0.286411	0.378226
604		H	-4.16671	-2.72175	-1.77569
605		H	-6.21779	-1.5674	-1.02119
606		H	-6.10746	0.200921	0.710454
607		H	-3.92901	0.838328	1.69879
608
609	Closed-ring isomer of I4
610		C	0.750779	-0.960588	0.222778
611		C	1.2794	0.380709	0.359218
612		C	0.422507	1.43072	0.175608
613		C	-0.940311	3.45672	-0.395092
614		N	-0.940913	1.21982	0.144742
615		C	-1.67327	2.3517	-0.179839
616		S	0.776088	3.10133	-0.194174
617		C	-1.40257	4.82272	-0.766845
618		H	-1.08864	5.56817	-0.0285
619		H	-1.00644	5.13375	-1.73916
620		H	-2.49344	4.84467	-0.825584
621		C	2.75578	0.356051	0.299426
622		C	1.86277	-1.9074	-0.106308
623		C	3.05599	-0.971731	-0.444184
624		F	3.35234	0.305616	1.52565
625		F	3.29499	1.41739	-0.349756
626		F	4.23714	-1.50669	-0.10759
627		F	3.04931	-0.726621	-1.7709
628		F	1.58949	-2.73801	-1.13274
629		F	2.19896	-2.67574	0.96061
630		H	-2.74708	2.2755	-0.25748
631		C	-0.573369	-1.13998	0.290949
632		C	-1.47788	-0.009803	0.757209
633		C	-2.80097	-0.518526	0.22851
634		C	-2.59747	-1.82819	-0.207112
635		C	-4.092	-0.007799	0.256769
636		C	-3.62208	-2.63693	-0.665855
637		C	-5.14305	-0.796436	-0.212368
638		H	-4.29637	0.983098	0.650437
639		C	-4.90489	-2.09239	-0.669778
640		H	-3.42368	-3.64721	-1.00289
641		H	-6.15339	-0.402678	-0.209232
642		H	-5.73316	-2.69507	-1.02735
643		C	-1.49235	0.141542	2.28605
644		H	-0.489727	0.376708	2.65212
645		H	-2.17651	0.942846	2.58201
646		H	-1.82582	-0.790534	2.74854
647		O	-1.29237	-2.23187	-0.118951
648
649	Transition state of I4
650		C	0.698248	-0.94318	0.154963
651		C	1.2483	0.334778	0.361035
652		C	-0.651748	-1.16262	0.272648
653		C	0.421344	1.47712	0.275639
654		C	-2.65246	-1.6817	-0.444633
655		C	-0.768179	3.53423	-0.447119
656		N	-0.890316	1.4483	0.524775
657		C	-1.53035	-0.28289	1.00107
658		C	-1.35064	-0.062737	2.48219
659		H	-1.93895	0.791161	2.82646
660		H	-1.6886	-0.957861	3.01435
661		H	-0.302729	0.113778	2.72961
662		C	-1.55555	2.55703	0.066894
663		S	0.893441	2.99763	-0.441599
664		C	-1.15468	4.89831	-0.908509
665		H	-0.716089	5.67959	-0.279244
666		H	-0.831236	5.08119	-1.93804
667		H	-2.24123	5.00676	-0.872676
668		C	-3.70044	-2.28695	-1.12358
669		C	-4.97917	-1.81245	-0.854594
670		C	2.72275	0.318699	0.179124
671		C	1.75275	-1.86401	-0.383629
672		C	3.07025	-1.18758	0.068709
673		F	3.41147	0.900056	1.19406
674		F	3.12258	0.959123	-0.958062
675		F	3.40382	-1.65793	1.28704
676		F	4.08226	-1.41644	-0.778556
677		F	1.72999	-1.92224	-1.73836
678		F	1.66203	-3.12545	0.081277
679		C	-2.84844	-0.63821	0.469576
680		H	-2.62794	2.61762	0.200968
681		C	-4.14264	-0.192471	0.742955
682		C	-5.20411	-0.780227	0.067651
683		H	-3.52016	-3.09183	-1.82604
684		H	-5.8247	-2.25846	-1.36807
685		H	-6.21792	-0.445185	0.25766
686		H	-4.31704	0.596898	1.46773
687		O	-1.34963	-2.02734	-0.561191

## Sheet: ωB97X-D
1	Table of Contents
2	Structure				Row
3	Closed-ring isomer of N1				21
4	Transition state of N1				65
5	Closed-ring isomer of N2				109
6	Transition state of N2				152
7	Closed-ring isomer of N3				195
8	Transition state of N3				235
9	Closed-ring isomer of N4				275
10	Transition state of N4				315
11	Closed-ring isomer of I1				355
12	Transition state of I1				399
13	Closed-ring isomer of I2				443
14	Transition state of I2				486
15	Closed-ring isomer of I3				529
16	Transition state of I3				569
17	Closed-ring isomer of I4				609
18	Transition state of I4				649
19
20	Structure	Atom	x	y	z
21	Closed-ring isomer of N1
22		C	0.797136	-0.95071	0.353717
23		C	2.0052	-0.179109	0.243665
24		C	-0.41093	-0.366139	0.487525
25		C	1.89106	1.16482	0.017052
26		C	-2.697	0.046249	0.166487
27		C	1.91967	3.61136	-0.522032
28		N	0.669603	1.78765	0.119751
29		C	-0.426627	1.11839	0.831795
30		C	-0.284673	1.33717	2.34237
31		H	-0.333649	2.40256	2.5887
32		H	-1.09003	0.814091	2.86436
33		H	0.675755	0.933166	2.68027
34		C	0.713719	3.15089	-0.162728
35		S	3.10511	2.30224	-0.511276
36		C	2.30673	5.0003	-0.911911
37		H	3.08922	5.39627	-0.255579
38		H	2.68041	5.03837	-1.94081
39		H	1.43815	5.66081	-0.842641
40		C	-4.12361	-0.176891	-0.106464
41		C	-5.09693	0.734238	0.32144
42		C	-4.53385	-1.32246	-0.802382
43		C	-6.44438	0.499362	0.071604
44		H	-4.79887	1.62247	0.871186
45		C	-5.88079	-1.55759	-1.04442
46		H	-3.78868	-2.01913	-1.17406
47		C	-6.84153	-0.647674	-0.608565
48		H	-7.18608	1.21411	0.415022
49		H	-6.18072	-2.449	-1.58693
50		H	-7.89385	-0.829998	-0.803852
51		C	3.18717	-1.05903	0.088709
52		C	1.12854	-2.40598	0.189387
53		C	2.56605	-2.39749	-0.401632
54		F	3.84751	-1.29026	1.25855
55		F	4.10932	-0.592797	-0.78986
56		F	3.27924	-3.47223	-0.041175
57		F	2.47783	-2.36151	-1.74756
58		F	0.269601	-3.07658	-0.611368
59		F	1.14916	-3.04753	1.38531
60		H	-0.197165	3.73005	-0.092158
61		S	-2.07841	1.7134	0.250125
62		C	-1.73888	-0.892053	0.322546
63		H	-1.93943	-1.95537	0.274573
64
65	Transition state of N1
66		C	0.950967	-0.930322	0.468626
67		C	1.98669	-0.019476	0.284116
68		C	-0.352401	-0.556742	0.811691
69		C	1.70194	1.36627	0.147696
70		C	-2.65166	-0.258365	0.432157
71		C	1.2605	3.66003	-0.67661
72		N	0.613273	1.91392	0.674563
73		C	-0.538356	0.665931	1.55871
74		C	0.10831	0.855805	2.91305
75		H	0.031201	1.89432	3.24605
76		H	-0.395448	0.210987	3.63953
77		H	1.16399	0.57742	2.8721
78		C	0.335346	3.16577	0.178858
79		S	2.50825	2.46702	-0.938766
80		C	1.31733	5.01563	-1.30572
81		H	2.18798	5.58342	-0.960871
82		H	1.3707	4.94791	-2.39723
83		H	0.418507	5.5806	-1.04454
84		C	-4.00133	-0.405033	-0.12376
85		C	-4.498	-1.68086	-0.425943
86		C	-4.81887	0.704796	-0.371476
87		C	-5.76254	-1.83715	-0.97834
88		H	-3.89191	-2.55523	-0.208087
89		C	-6.08826	0.544633	-0.915265
90		H	-4.45229	1.70413	-0.152555
91		C	-6.56493	-0.725552	-1.225
92		H	-6.12815	-2.83417	-1.20552
93		H	-6.70492	1.41873	-1.10251
94		H	-7.5563	-0.849752	-1.6498
95		C	3.25145	-0.702205	-0.103106
96		C	1.42165	-2.31699	0.109569
97		C	2.77817	-2.09081	-0.60592
98		F	4.10107	-0.87167	0.945188
99		F	3.94921	-0.047987	-1.06645
100		F	3.66159	-3.06736	-0.362025
101		F	2.56329	-2.0157	-1.93515
102		F	0.560124	-2.9899	-0.688272
103		F	1.61545	-3.06871	1.21938
104		H	-0.548934	3.68255	0.53167
105		S	-2.24783	1.11257	1.48246
106		H	-1.59319	-1.91431	-0.421266
107		C	-1.57224	-1.04963	0.229678
108
109	Closed-ring isomer of N2
110		C	0.679409	-0.938841	0.342147
111		C	1.94233	-0.260219	0.240499
112		C	-0.468914	-0.253324	0.500491
113		C	1.93772	1.09024	0.027009
114		C	-2.60938	0.208373	0.176294
115		C	2.16552	3.53077	-0.495318
116		N	0.77067	1.81065	0.134199
117		C	-0.371418	1.23411	0.849252
118		C	-0.220916	1.45356	2.35822
119		H	-0.209162	2.52103	2.60012
120		H	-1.05291	0.979007	2.88489
121		H	0.715515	0.998058	2.69768
122		C	0.925594	3.16837	-0.139766
123		S	3.24097	2.12996	-0.490624
124		C	2.66564	4.88564	-0.876373
125		H	3.47972	5.20992	-0.219219
126		H	3.03925	4.89961	-1.90586
127		H	1.85537	5.61578	-0.800084
128		C	-4.03158	-0.037594	-0.09179
129		C	-4.97419	0.994871	-0.087122
130		C	-4.44675	-1.34824	-0.363354
131		C	-6.31131	0.72314	-0.354055
132		H	-4.67098	2.01356	0.138501
133		C	-5.78269	-1.61426	-0.625352
134		H	-3.70561	-2.14023	-0.367954
135		C	-6.71804	-0.580177	-0.623004
136		H	-7.03631	1.53103	-0.346851
137		H	-6.09666	-2.63179	-0.836433
138		H	-7.76276	-0.79127	-0.830384
139		C	3.0545	-1.22836	0.089943
140		C	0.890858	-2.41578	0.147191
141		C	2.33734	-2.50822	-0.421899
142		F	3.67874	-1.51846	1.26589
143		F	4.02064	-0.823542	-0.771784
144		F	2.96086	-3.63785	-0.063188
145		F	2.27462	-2.4508	-1.76849
146		F	0.007424	-2.99876	-0.683093
147		F	0.84618	-3.07518	1.33157
148		H	0.063989	3.81816	-0.064208
149		N	-1.74979	-0.730613	0.334931
150		S	-1.98123	1.8909	0.243731
151
152	Transition state of N2
153		C	0.827433	-0.899311	0.507453
154		C	1.93373	-0.083855	0.303187
155		C	-0.433902	-0.395665	0.839327
156		C	1.77033	1.31529	0.104477
157		C	-2.58834	-0.065569	0.426803
158		C	1.54071	3.59521	-0.835863
159		N	0.730066	1.98205	0.590805
160		C	-0.525503	0.871724	1.52668
161		C	0.124265	1.08624	2.87503
162		H	0.142111	2.14514	3.14487
163		H	-0.44192	0.534304	3.63156
164		H	1.14966	0.709227	2.86264
165		C	0.567735	3.22744	0.030524
166		S	2.68078	2.28686	-1.02141
167		C	1.72238	4.90778	-1.52933
168		H	2.636	5.41379	-1.19998
169		H	1.78055	4.78113	-2.61527
170		H	0.873979	5.56116	-1.30904
171		C	-3.92618	-0.284356	-0.135956
172		C	-4.16005	-1.44549	-0.88465
173		C	-4.96916	0.626943	0.053083
174		C	-5.41395	-1.68414	-1.42859
175		H	-3.34468	-2.14636	-1.02858
176		C	-6.22298	0.38497	-0.497342
177		H	-4.8104	1.53223	0.63358
178		C	-6.4497	-0.770477	-1.23854
179		H	-5.58453	-2.58744	-2.00644
180		H	-7.0244	1.10107	-0.343353
181		H	-7.42946	-0.959583	-1.66658
182		C	3.14382	-0.88552	-0.032276
183		C	1.17523	-2.336	0.198543
184		C	2.56432	-2.24913	-0.489769
185		F	3.95642	-1.07862	1.04036
186		F	3.90954	-0.329102	-1.00534
187		F	3.35887	-3.28313	-0.18399
188		F	2.38854	-2.21094	-1.82597
189		F	0.284744	-2.9583	-0.592708
190		F	1.28773	-3.05489	1.34282
191		H	-0.268465	3.83866	0.347508
192		S	-2.20121	1.40523	1.37564
193		N	-1.60225	-0.876116	0.287502
194
195	Closed-ring isomer of N3
196		C	-0.127229	-0.839229	0.190649
197		C	1.27389	-0.510274	0.251991
198		C	-1.08759	0.104049	0.260005
199		C	1.64062	0.794279	0.080831
200		C	-3.08357	1.30531	-0.219854
201		C	2.54119	3.09328	-0.334086
202		N	0.689122	1.78195	0.054853
203		C	-0.645948	1.52407	0.607989
204		C	-0.635545	1.74223	2.12553
205		H	-0.358952	2.77217	2.37134
206		H	-1.62756	1.53469	2.53498
207		H	0.08554	1.05654	2.58404
208		C	1.21348	3.05534	-0.156546
209		S	-1.9034	2.62543	-0.196338
210		S	3.22076	1.4667	-0.226432
211		C	-2.53044	0.043519	0.05413
212		C	3.4105	4.27696	-0.606292
213		H	4.18227	4.39089	0.162557
214		H	3.91237	4.19116	-1.57602
215		H	2.80482	5.18714	-0.617829
216		C	2.12005	-1.72263	0.260881
217		C	-0.256566	-2.3237	-0.040425
218		C	1.19249	-2.80165	-0.356772
219		F	2.47594	-2.12173	1.51596
220		F	3.2721	-1.59724	-0.444042
221		F	1.43244	-4.034	0.109979
222		F	1.36446	-2.79876	-1.69382
223		F	-1.08388	-2.64748	-1.05739
224		F	-0.70888	-2.96545	1.06783
225		H	0.54236	3.9036	-0.173338
226		C	-4.43715	1.46585	-0.483197
227		C	-3.37553	-1.06747	0.1006
228		H	-2.97947	-2.04417	0.348758
229		H	-4.84825	2.44783	-0.694907
230		C	-4.73247	-0.912704	-0.157712
231		C	-5.25974	0.342768	-0.456463
232		H	-5.38568	-1.77847	-0.118027
233		H	-6.32128	0.452742	-0.655335
234
235	Transition state of N3
236		C	0.204266	-0.858982	0.311391
237		C	1.3255	-0.035138	0.266827
238		C	-1.08903	-0.382485	0.551269
239		C	1.1752	1.37193	0.114331
240		C	-3.34905	0.194938	0.093435
241		C	1.04871	3.6995	-0.712879
242		N	0.096416	2.015	0.533038
243		C	-1.20554	0.822667	1.32978
244		C	-0.604968	0.926642	2.71426
245		H	-0.602637	1.9613	3.06676
246		H	-1.20612	0.319675	3.39832
247		H	0.419696	0.549709	2.72194
248		C	-0.005325	3.29157	0.034371
249		S	-2.84796	1.47556	1.20058
250		S	2.19321	2.38964	-0.864057
251		C	-2.33276	-0.753306	-0.115764
252		C	1.30099	5.04646	-1.3117
253		H	2.18388	5.52323	-0.873065
254		H	1.45605	4.98084	-2.39354
255		H	0.439933	5.69557	-1.13145
256		C	2.57552	-0.795553	0.001878
257		C	0.62255	-2.25297	-0.085424
258		C	2.14514	-2.27019	0.198878
259		F	3.59873	-0.467693	0.829322
260		F	3.0455	-0.622693	-1.26745
261		F	2.34599	-2.6277	1.48317
262		F	2.80947	-3.11691	-0.597754
263		F	0.43513	-2.47834	-1.41458
264		F	-0.02249	-3.22738	0.584839
265		H	-0.866111	3.89161	0.303068
266		C	-2.6148	-1.84578	-0.94422
267		C	-4.59897	0.094114	-0.502728
268		H	-1.86133	-2.59741	-1.1401
269		H	-5.35906	0.850042	-0.330593
270		C	-3.87114	-1.96789	-1.52383
271		C	-4.85953	-1.00547	-1.31298
272		H	-4.08072	-2.82442	-2.15713
273		H	-5.83389	-1.11239	-1.77908
274
275	Closed-ring isomer of N4
276		C	-0.049562	-0.88268	0.295058
277		C	1.25336	-0.263937	0.314543
278		C	-1.16896	-0.141061	0.381024
279		C	1.32441	1.08773	0.102984
280		C	-3.08629	1.00856	-0.051951
281		C	1.66379	3.51714	-0.424021
282		N	0.187981	1.85458	0.142052
283		C	-1.01598	1.31941	0.772776
284		C	-0.978962	1.5392	2.28265
285		H	-0.931637	2.60893	2.50847
286		H	-1.88117	1.11578	2.73236
287		H	-0.103677	1.03932	2.70766
288		C	0.39244	3.20184	-0.137888
289		S	2.69003	2.07976	-0.341532
290		C	-2.57358	-0.291866	0.048649
291		C	2.32682	-1.27939	0.222123
292		C	0.114983	-2.35707	0.058012
293		C	1.5972	-2.50847	-0.388618
294		F	2.83945	-1.63805	1.43342
295		F	3.37849	-0.899081	-0.545615
296		F	2.12939	-3.67851	-0.012115
297		F	1.65291	-2.41434	-1.73318
298		F	-0.72393	-2.85894	-0.876425
299		F	-0.080664	-3.06571	1.1977
300		C	-4.39251	1.27132	-0.417919
301		C	-3.40072	-1.37672	-0.228047
302		H	-3.01821	-2.38869	-0.167181
303		H	-4.75736	2.28978	-0.489475
304		C	-4.72473	-1.13292	-0.586486
305		C	-5.21082	0.171866	-0.682682
306		H	-5.38428	-1.96853	-0.796863
307		H	-0.460811	3.8652	-0.120637
308		C	2.23375	4.84914	-0.787813
309		H	3.01596	5.15477	-0.08455
310		H	2.67078	4.83812	-1.79209
311		H	1.44539	5.60649	-0.769602
312		H	-6.24554	0.339261	-0.965545
313		O	-2.16182	1.98011	0.237394
314
315	Transition state of N4
316		C	0.169224	-0.868993	0.36657
317		C	1.2382	0.023111	0.329283
318		C	-1.13954	-0.490312	0.631752
319		C	0.986154	1.419	0.199164
320		C	-3.27026	0.207099	0.288347
321		C	0.715726	3.75584	-0.574811
322		N	-0.144968	1.97667	0.606664
323		C	-1.4019	0.712092	1.37605
324		C	-0.945867	0.938713	2.78709
325		H	-1.0762	1.98459	3.07324
326		H	-1.55121	0.307294	3.44605
327		H	0.103697	0.660239	2.89543
328		C	-0.321695	3.25707	0.139095
329		S	1.9511	2.53118	-0.731095
330		C	-2.38828	-0.828845	-0.028199
331		C	2.51464	-0.657655	-0.016918
332		C	0.630765	-2.21591	-0.119553
333		C	2.16634	-2.16727	0.081789
334		F	3.5466	-0.341186	0.804757
335		F	2.94122	-0.374625	-1.28225
336		F	2.45775	-2.61463	1.31954
337		F	2.82854	-2.90811	-0.816263
338		F	0.36273	-2.38201	-1.44271
339		F	0.069004	-3.25081	0.535883
340		C	-2.81893	-1.83448	-0.891872
341		C	-4.55436	0.306573	-0.203465
342		H	-2.15738	-2.64575	-1.17275
343		H	-5.19984	1.13437	0.068336
344		C	-4.11932	-1.76978	-1.38771
345		C	-4.97559	-0.717737	-1.05317
346		H	-4.47201	-2.55187	-2.05285
347		H	-1.22585	3.79008	0.405698
348		C	0.886002	5.13037	-1.13885
349		H	1.06172	5.10149	-2.21918
350		H	-0.019377	5.71617	-0.958428
351		H	1.72795	5.65489	-0.674779
352		O	-2.68651	1.10695	1.16483
353		H	-5.98275	-0.693691	-1.45678
354
355	Closed-ring isomer of I1
356		C	1.01328	-0.932879	0.334355
357		C	2.03455	0.089555	0.289731
358		C	-0.278305	-0.612184	0.490654
359		C	1.63128	1.37944	0.085654
360		C	-2.72767	-0.136936	0.217143
361		C	1.11499	3.76525	-0.477609
362		N	0.303318	1.71593	0.188809
363		C	-0.628557	0.814457	0.904725
364		C	-0.451487	1.01336	2.42249
365		H	-0.724189	2.03579	2.70656
366		H	-1.09574	0.312062	2.96024
367		H	0.587766	0.828927	2.71126
368		C	0.040949	3.04655	-0.121221
369		S	2.56558	2.75932	-0.439146
370		C	1.18199	5.20272	-0.878189
371		H	1.84788	5.77072	-0.219362
372		H	1.54811	5.31741	-1.90418
373		H	0.186067	5.65095	-0.822403
374		C	-4.16797	-0.266696	-0.071792
375		C	-5.09292	0.542362	0.597841
376		C	-4.63157	-1.1846	-1.02045
377		C	-6.44942	0.449002	0.310858
378		H	-4.7451	1.23052	1.36269
379		C	-5.98947	-1.27815	-1.30354
380		H	-3.92382	-1.81526	-1.55095
381		C	-6.90133	-0.461001	-0.641341
382		H	-7.15643	1.07997	0.840896
383		H	-6.33504	-1.99083	-2.04598
384		H	-7.96176	-0.537737	-0.861374
385		C	3.37352	-0.513171	0.100054
386		C	1.64865	-2.26851	0.072343
387		C	3.049	-1.91126	-0.497586
388		F	4.06199	-0.690418	1.26373
389		F	4.18446	0.197224	-0.723682
390		F	3.97418	-2.83623	-0.21056
391		F	2.9506	-1.79159	-1.83814
392		F	0.947817	-3.04491	-0.781448
393		F	1.81018	-2.97065	1.22201
394		C	-2.06829	0.992971	0.501949
395		S	-1.71425	-1.59754	0.234813
396		H	-2.56778	1.95447	0.553352
397		H	-0.974847	3.41052	-0.066668
398
399	Transition state of I1
400		C	1.07918	-0.918462	0.430945
401		C	2.00105	0.134216	0.401815
402		C	-0.267546	-0.730688	0.681102
403		C	1.53922	1.46862	0.278286
404		C	-2.70632	-0.29959	0.347568
405		C	0.86974	3.71712	-0.528524
406		N	0.32961	1.83818	0.688605
407		C	-0.722135	0.426861	1.41756
408		C	-0.229441	0.636928	2.83464
409		H	-0.461856	1.64865	3.17906
410		H	-0.736757	-0.083335	3.48573
411		H	0.847659	0.474635	2.91364
412		C	-0.065931	3.0593	0.193398
413		S	2.30045	2.72386	-0.669222
414		C	0.804215	5.09529	-1.10537
415		H	1.53808	5.76217	-0.64027
416		H	0.993854	5.08736	-2.18379
417		H	-0.190699	5.51748	-0.939539
418		C	-4.12289	-0.368222	-0.053242
419		C	-5.12271	0.060288	0.827873
420		C	-4.49331	-0.848155	-1.31462
421		C	-6.45953	0.022237	0.450608
422		H	-4.84949	0.401853	1.82177
423		C	-5.83161	-0.888465	-1.6882
424		H	-3.72774	-1.17422	-2.01297
425		C	-6.81819	-0.451597	-0.808707
426		H	-7.22421	0.353391	1.14671
427		H	-6.10311	-1.2591	-2.67185
428		H	-7.86322	-0.485071	-1.10127
429		C	3.36807	-0.364686	0.093136
430		C	1.74994	-2.19953	0.008885
431		C	3.11302	-1.74439	-0.569665
432		F	4.1343	-0.541787	1.20407
433		F	4.07126	0.448183	-0.736269
434		F	4.09399	-2.62819	-0.344076
435		F	2.98476	-1.56277	-1.90019
436		F	1.03195	-2.89455	-0.903003
437		F	1.96024	-3.01629	1.06838
438		C	-2.13947	0.631255	1.15465
439		S	-1.58444	-1.52782	-0.186
440		H	-2.69807	1.44698	1.60127
441		H	-1.0488	3.43409	0.451775
442
443	Closed-ring isomer of I2
444		C	1.08143	-0.937937	0.33423
445		C	2.01687	0.159543	0.263536
446		C	-0.224523	-0.718518	0.533322
447		C	1.50634	1.41959	0.098147
448		C	-2.63357	-0.274387	0.254955
449		C	0.777078	3.76951	-0.386389
450		N	0.165152	1.65147	0.252956
451		C	-0.692071	0.671167	0.942349
452		C	-0.601649	0.880936	2.46017
453		H	-0.97612	1.87461	2.72384
454		H	-1.20348	0.124506	2.97182
455		H	0.438491	0.784762	2.7853
456		C	-0.224035	2.96085	-0.010632
457		S	2.30473	2.88083	-0.424876
458		C	0.718237	5.21608	-0.754278
459		H	1.35907	5.82125	-0.103768
460		H	1.03853	5.38147	-1.78866
461		H	-0.30772	5.58094	-0.655103
462		C	-4.06535	-0.388902	-0.081935
463		C	-4.91261	0.689849	0.195003
464		C	-4.58885	-1.54157	-0.673231
465		C	-6.26297	0.613359	-0.116152
466		H	-4.49529	1.57751	0.657864
467		C	-5.94245	-1.61461	-0.98272
468		H	-3.93999	-2.37988	-0.910222
469		C	-6.7807	-0.539221	-0.704622
470		H	-6.91544	1.45256	0.104145
471		H	-6.34056	-2.51216	-1.4452
472		H	-7.83779	-0.598533	-0.94549
473		C	3.39193	-0.334394	0.026593
474		C	1.81139	-2.22179	0.058142
475		C	3.16067	-1.7575	-0.556522
476		F	4.13518	-0.449989	1.16421
477		F	4.11268	0.435004	-0.827411
478		F	4.16428	-2.60492	-0.295204
479		F	3.01106	-1.65463	-1.89355
480		F	1.14525	-3.05336	-0.770407
481		F	2.06124	-2.90142	1.20486
482		S	-1.62407	-1.75557	0.329919
483		H	-1.27039	3.20993	0.093738
484		N	-2.06774	0.83856	0.516877
485
486	Transition state of I2
487		C	1.14321	-0.913783	0.418689
488		C	1.97244	0.207555	0.378717
489		C	-0.215967	-0.841703	0.677091
490		C	1.40585	1.50641	0.26767
491		C	-2.61597	-0.469665	0.361164
492		C	0.55276	3.70022	-0.508798
493		N	0.177697	1.77447	0.691051
494		C	-0.783172	0.268625	1.40431
495		C	-0.35874	0.525374	2.82921
496		H	-0.684084	1.51757	3.14902
497		H	-0.836491	-0.22736	3.46596
498		H	0.724224	0.44021	2.93976
499		C	-0.320612	2.96414	0.217947
500		S	2.0554	2.82442	-0.674866
501		C	0.371401	5.07311	-1.07347
502		H	1.05398	5.79322	-0.609751
503		H	0.549454	5.08889	-2.15377
504		H	-0.652429	5.41197	-0.893579
505		C	-4.03204	-0.502055	-0.043591
506		C	-4.91346	0.43124	0.514461
507		C	-4.51449	-1.43271	-0.969045
508		C	-6.25285	0.431618	0.149717
509		H	-4.52897	1.14476	1.2349
510		C	-5.85614	-1.43005	-1.33039
511		H	-3.84419	-2.16087	-1.41756
512		C	-6.72771	-0.498507	-0.772648
513		H	-6.93013	1.15779	0.588596
514		H	-6.2205	-2.15604	-2.05033
515		H	-7.77594	-0.498113	-1.05583
516		C	3.37632	-0.178743	0.070127
517		C	1.91427	-2.14149	0.010427
518		C	3.23641	-1.58397	-0.573908
519		F	4.15777	-0.27474	1.17951
520		F	4.00325	0.680209	-0.773151
521		F	4.28577	-2.38062	-0.333466
522		F	3.09659	-1.4332	-1.90681
523		F	1.25111	-2.89772	-0.894697
524		F	2.18736	-2.93007	1.07613
525		S	-1.48655	-1.68876	-0.194334
526		H	-1.32897	3.24724	0.493209
527		N	-2.14243	0.44006	1.15507
528
529	Closed-ring isomer of I3
530		C	0.864335	-0.902593	0.202228
531		C	1.3738	0.436526	0.39662
532		C	0.501784	1.47088	0.197163
533		C	-0.872631	3.45411	-0.461633
534		N	-0.851158	1.22914	0.130533
535		C	-1.59184	2.34001	-0.265709
536		S	0.839351	3.14585	-0.167417
537		C	-1.35223	4.80364	-0.886538
538		H	-1.10265	5.56862	-0.14306
539		H	-0.907847	5.10638	-1.84076
540		H	-2.43892	4.79038	-1.00798
541		C	2.85425	0.441935	0.358432
542		C	2.01024	-1.82413	-0.099613
543		C	3.19101	-0.864646	-0.414272
544		F	3.4299	0.373615	1.59235
545		F	3.38447	1.52754	-0.257677
546		F	4.38066	-1.38286	-0.082619
547		F	3.18491	-0.593024	-1.73609
548		F	1.76977	-2.66972	-1.12517
549		F	2.33434	-2.57816	0.980855
550		H	-2.65586	2.23979	-0.413575
551		C	-0.455761	-1.13878	0.195148
552		C	-1.37141	-0.031774	0.716515
553		C	-2.77205	-0.411132	0.276263
554		C	-2.85983	-1.684	-0.29518
555		C	-3.9439	0.296663	0.532557
556		C	-4.086	-2.21904	-0.678653
557		C	-5.17519	-0.224402	0.145366
558		H	-3.90629	1.24895	1.0545
559		C	-5.24107	-1.47347	-0.468169
560		H	-4.14072	-3.20545	-1.12811
561		H	-6.08342	0.338085	0.33557
562		H	-6.20168	-1.8804	-0.76832
563		S	-1.32004	-2.54241	-0.422678
564		C	-1.30541	0.062513	2.25204
565		H	-0.280073	0.248922	2.58223
566		H	-1.94809	0.874255	2.60907
567		H	-1.65044	-0.878975	2.68805
568
569	Transition state of I3
570		C	0.845432	-0.899879	0.267332
571		C	1.33227	0.395991	0.456889
572		C	-0.508415	-1.19791	0.271249
573		C	0.465289	1.5118	0.317967
574		C	-2.86131	-1.57924	-0.490262
575		C	-0.793678	3.47763	-0.516318
576		N	-0.844559	1.42543	0.529159
577		C	-1.42109	-0.359393	0.991644
578		C	-1.21882	-0.155437	2.47729
579		H	-1.78511	0.707044	2.83838
580		H	-1.5698	-1.05269	2.99849
581		H	-0.164355	-0.005531	2.717
582		C	-1.54993	2.48738	0.011554
583		S	0.891373	3.02802	-0.4378
584		C	-1.23535	4.80256	-1.05107
585		H	-0.855097	5.62984	-0.442362
586		H	-0.889108	4.9547	-2.07863
587		H	-2.32749	4.85446	-1.05021
588		C	-4.08766	-1.93464	-1.05414
589		C	-5.23589	-1.29364	-0.611381
590		C	2.82	0.417776	0.395385
591		C	1.97659	-1.83086	-0.082312
592		C	3.17519	-0.889319	-0.3616
593		F	3.39931	0.389998	1.62609
594		F	3.32429	1.50165	-0.247014
595		F	4.3474	-1.41478	0.017477
596		F	3.22189	-0.619509	-1.68203
597		F	1.70286	-2.61226	-1.15164
598		F	2.27745	-2.64956	0.953493
599		C	-2.78933	-0.596936	0.508535
600		S	-1.30734	-2.27601	-0.894504
601		H	-2.62893	2.49227	0.106359
602		C	-3.95874	0.023847	0.957077
603		C	-5.17739	-0.317947	0.391068
604		H	-4.14245	-2.69702	-1.82467
605		H	-6.19448	-1.559	-1.04689
606		H	-6.08849	0.164795	0.729544
607		H	-3.90902	0.770626	1.74504
608
609	Closed-ring isomer of I4
610		C	0.749322	-0.963437	0.229476
611		C	1.27805	0.384289	0.359614
612		C	0.42391	1.42822	0.161279
613		C	-0.942227	3.4596	-0.388141
614		N	-0.940259	1.21339	0.1178
615		C	-1.67457	2.35558	-0.1892
616		S	0.778481	3.10581	-0.189789
617		C	-1.4083	4.83158	-0.750672
618		H	-1.09494	5.56982	-0.004326
619		H	-1.01113	5.14774	-1.72133
620		H	-2.50015	4.85034	-0.809262
621		C	2.75758	0.35721	0.299146
622		C	1.86304	-1.91172	-0.100367
623		C	3.05491	-0.972154	-0.450785
624		F	3.34907	0.299411	1.52653
625		F	3.30091	1.4188	-0.345487
626		F	4.24095	-1.5048	-0.128458
627		F	3.03232	-0.725535	-1.77745
628		F	1.58663	-2.7493	-1.11996
629		F	2.20464	-2.67051	0.971326
630		H	-2.74876	2.28066	-0.273216
631		C	-0.570631	-1.14249	0.29702
632		C	-1.47747	-0.004326	0.746792
633		C	-2.79889	-0.52129	0.219798
634		C	-2.59493	-1.83539	-0.196748
635		C	-4.08783	-0.00738	0.239268
636		C	-3.61832	-2.64835	-0.648982
637		C	-5.13869	-0.799889	-0.223525
638		H	-4.28932	0.988793	0.622898
639		C	-4.90063	-2.10157	-0.664594
640		H	-3.42019	-3.66394	-0.9717
641		H	-6.14913	-0.404853	-0.228212
642		H	-5.72912	-2.70771	-1.01747
643		C	-1.50092	0.166133	2.27528
644		H	-0.500243	0.408521	2.64466
645		H	-2.18911	0.972112	2.55196
646		H	-1.83748	-0.760803	2.74774
647		O	-1.28943	-2.24094	-0.094518
648
649	Transition state of I4
650		C	0.714294	-0.936863	0.164469
651		C	1.24481	0.343753	0.376261
652		C	-0.632228	-1.1833	0.28762
653		C	0.398385	1.47839	0.289843
654		C	-2.62532	-1.6985	-0.454331
655		C	-0.829378	3.50739	-0.439818
656		N	-0.903827	1.43247	0.560069
657		C	-1.51731	-0.332985	1.02874
658		C	-1.34213	-0.109301	2.51122
659		H	-1.94016	0.741124	2.84964
660		H	-1.67496	-1.00804	3.04165
661		H	-0.295406	0.077056	2.76074
662		C	-1.59449	2.52966	0.097991
663		S	0.841239	2.99461	-0.453961
664		C	-1.24641	4.85996	-0.922163
665		H	-0.807545	5.65779	-0.313605
666		H	-0.943833	5.02494	-1.96148
667		H	-2.33467	4.95096	-0.867559
668		C	-3.66973	-2.28614	-1.15684
669		C	-4.94956	-1.81949	-0.882749
670		C	2.72041	0.353318	0.178207
671		C	1.77894	-1.84266	-0.388786
672		C	3.09246	-1.15019	0.062358
673		F	3.40795	0.946735	1.18596
674		F	3.09627	0.999048	-0.96424
675		F	3.43531	-1.61914	1.27903
676		F	4.10566	-1.36265	-0.787535
677		F	1.74501	-1.8869	-1.74343
678		F	1.70478	-3.10817	0.066317
679		C	-2.83211	-0.684189	0.485955
680		H	-2.66682	2.5711	0.245541
681		C	-4.12589	-0.241936	0.762638
682		C	-5.18245	-0.811089	0.065104
683		H	-3.48443	-3.07013	-1.8821
684		H	-5.7921	-2.25161	-1.41409
685		H	-6.19837	-0.4808	0.255456
686		H	-4.30025	0.530483	1.50668
687		O	-1.32038	-2.03238	-0.57464
